1  
2  
3  
4  
5  
6  
7  
8  
9  
10  
11  
12  
13  
14  
15  
16  
17  
18  
19  
20  
21  
22  
23  
24  
25  
26  
27  
28  
29  
30

## **SARS-CoV-2 Exploits Sexually Dimorphic and Adaptive IFN and TNF $\alpha$ Signaling to Gain Entry into Alveolar Epithelium**

**Authors:** Yan Wang<sup>1</sup>†, Sreeharsha Gurrupu<sup>1</sup>†, Hong Chen<sup>1</sup>†, Sara Laudato<sup>1</sup>†, Emily Caggiano<sup>1,2</sup>, Yan Jiang<sup>1</sup>, Hsiang-Hsi Ling<sup>1,2</sup>, and Filippo G. Giancotti<sup>1,3\*</sup>

**Affiliations:**

<sup>1</sup> Department of Cancer Biology, The University of Texas MD Anderson Cancer Center, Unit 1906, PO Box 301429, Houston, TX 77054/77030-1429, USA.

<sup>2</sup> The University of Texas MD Anderson Cancer Center UTHealth Graduate School of Biomedical Sciences, Houston, TX 77030, USA.

<sup>3</sup> Department of Genitourinary Oncology, The University of Texas MD Anderson Cancer Center, Houston, TX 77054, USA.

† These authors contributed equally to this work.

\* Corresponding author. Email: [FGGiancotti@MDAnderson.org](mailto:FGGiancotti@MDAnderson.org)

31 **Abstract**

32 Infection of the alveolar epithelium constitutes a bottleneck in the progression of COVID-19 to  
33 SARS presumably due to the paucity of viral entry receptors in alveolar epithelial type 1 and 2  
34 cells. We have found that the male alveolar epithelial cells express twice as many ACE2 and  
35 TMPRSS2 entry receptors as the female ones. Intriguingly, IFN and TNF- $\alpha$  signaling are  
36 preferentially active in male alveolar cells and induce binding of the cognate transcription factors  
37 to the promoters and lung-active enhancers of *ACE2* and *TMPRSS2*. Cotreatment with IFN-I  
38 and III dramatically increases expression of the receptors and viral entry in alveolar epithelial  
39 cells. TNF $\alpha$  and IFN-II, typically overproduced during the cytokine storm, similarly collaborate to  
40 induce these events. Whereas JAK inhibitors suppress viral entry induced by IFN-I/III,  
41 simultaneous inhibition of IKK/NF- $\kappa$ B is necessary to block viral entry induced by TNF $\alpha$  and IFN-  
42 II. In addition to explaining the increased incidence of SARS in males, these findings indicate  
43 that SARS-Cov-2 hijacks epithelial immune signaling to promote infection of the alveolar  
44 epithelium and suggest that JAK inhibitors, singly and in combination with NF-KB inhibitors, may  
45 exhibit efficacy in preventing or treating COVID-19 SARS.

46

## 47 **Introduction**

48 The Coronavirus Disease-19 (COVID-19) pandemic has illustrated the power of novel airborne  
49 viruses to spread rapidly amongst immunologically naïve human populations and cause severe  
50 lung disease and death in individuals with predisposing conditions (1). Although public health  
51 measures, such as lockdowns, have been effective, they have imposed a heavy economic and  
52 social price, which has limited their full implementation (2). Extraordinary efforts have led to the  
53 recent development of safe and effective vaccines, and large-scale vaccination efforts are  
54 underway in several major countries (3). However, it remains uncertain whether these efforts will  
55 be so successful to eradicate the disease (4, 5). In order to develop better therapeutics for  
56 COVID-19 and novel coronaviruses that may emerge in the future, it is important to understand  
57 the biology of viral infection, viral pathogenicity, and immune response to the disease.

58 The etiological agent of COVID-19, Severe Acute Respiratory Syndrome Coronavirus-2  
59 (SARS-CoV-2), is an enveloped RNA virus decorated by spike (S) protein trimers, which mediate  
60 entry into host cells (6). Although SARS-Cov-2 usually produces only a mild upper respiratory  
61 tract infection, it spreads to the distal lung in a minor but significant fraction of individuals, causing  
62 bilateral pneumonia characterized by severe hypoxia (7). Simultaneous or consequent systemic  
63 dissemination underlies extrapulmonary manifestations of the disease, including multiorgan  
64 injury, endothelial cell damage and ensuing micro thromboembolism, and severe dysregulation  
65 of immune responses (8). These observations suggest that viral entry into and damage to the  
66 alveolar epithelium occurs infrequently but is a major determinant of progression to severe  
67 disease.

68 The entry of SARS-Cov-2 into target cells requires proteolytic activation of the S protein  
69 mediated by the cell surface serine protease TMPRSS2 and subsequent binding of cleaved,  
70 fusogenic S to the entry receptor Angiotensin-Converting Enzyme 2 (ACE2) (9). In contrast to  
71 what previously assumed, viral exit is not mediated by the secretory pathway, but by lysosomal  
72 trafficking (10). This non-lytic release mechanism is associated with lysosome deacidification  
73 and inactivation of lysosomal enzymes, making it unlikely to generate a virus with activated S  
74 protein. These considerations suggest that SARS-Cov-2 entry into cells is critically dependent  
75 on the co-expression of ACE2 and TMPRSS2 in target cells.

76 Reverse genetics experiments have revealed a proximal to distal gradient in sensitivity to  
77 infection of the airway epithelium, which correlates with decreasing levels of expression of ACE2,

78 but not TMPRSS2 (11). Single-cell RNA sequencing (scRNA-seq) analysis has indicated that  
79 goblet and ciliated cells from the nasal epithelium express elevated levels of ACE2 and  
80 TMPRSS2, suggesting that they constitute the initial entry points for infection (12). Although  
81 ACE2 and TMPRSS2 are expressed in bronchial secretory cells, where ACE2 is upregulated by  
82 smoking via inflammatory signaling (13, 14), ACE2 and TMPRSS2 are co-expressed only in a  
83 small subset of alveolar epithelial type II cells, suggesting that viral entry may require  
84 upregulation of ACE2 or both ACE2 and TMPRSS2 (11, 15).

85 The mechanisms that regulate the expression of ACE2 and TMPRSS2 in lung alveolar  
86 epithelium are incompletely understood. Expression of ACE2 correlates with elevated interferon  
87 (IFN) signaling in a subset of type II alveolar epithelial cells (15). In addition, it has been reported  
88 that treatment with IFN $\alpha$  induces upregulation of ACE2 in stem cell-derived alveolo-spheres  
89 consisting of type II cells (16). However, recent findings have indicated that IFN signaling only  
90 induces expression of a truncated form of ACE2, which lacks the N-terminal S protein-binding  
91 site and is generated through cooption of an IFN-responsive endogenous retroelement (17, 18).  
92 In parallel, association studies have lent support to the notion that TMPRSS2 is upregulated by  
93 androgen receptor (AR) signaling in lung epithelium as it is in the normal prostate and androgen-  
94 dependent prostate cancer (19). In fact, prostate tumorigenesis is often initiated by oncogenic  
95 fusions bringing an oncogenic ETS factor, such as ERG or ETV1, under the control of the AR-  
96 regulated promoter of *TMPRSS2* (20). Consistently, a recent study has shown that dutasteride,  
97 an androgen biosynthesis inhibitor, inhibits the expression of *TMPRSS2* in alveolar epithelial  
98 cells (21). In addition, preliminary evidence suggests that the incidence of severe COVID-19  
99 disease is reduced in prostate cancer patients treated with second-generation AR inhibitors,  
100 such as enzalutamide and abiraterone (22). However, it has not been yet shown if blockade of  
101 the AR with enzalutamide or other direct inhibitors reduces TMPRSS2 expression in alveolar  
102 epithelial cells.

103 Early studies have indicated that the age-adjusted incidence and mortality of COVID-19  
104 are strikingly higher in males as compared to females (23, 24). Patients progressing to severe  
105 disease exhibit defective B and T cell responses (25, 26) and a delayed but exaggerated  
106 activation of innate immune system, culminating in overproduction of multiple cytokines and  
107 systemic toxicity (27-29). Intriguingly, higher plasma levels of innate immune cytokines and non-  
108 classical monocytes, but poorer T cell responses, are observed in men as compared to women

109 during moderate disease, suggesting that sex differences in immune responses may contribute  
110 to the higher incidence of severe disease and death in men (30). Although it is known that women  
111 mount stronger immune responses against viruses and vaccines and exhibit superior immune-  
112 mediated tissue repair (31, 32), the molecular and cellular mechanisms underlying sex-  
113 differences in immunity and their relationship to SARS-CoV-2 pathogenesis are not well  
114 understood (33).

115 In this study, we have examined the role of innate and adaptive IFN and NF- $\kappa$ B signaling  
116 in regulating the expression of viral entry receptors and infection of alveolar epithelium in COVID-  
117 19. Our findings indicate that sexually dimorphic IFN signaling upregulates the expression of  
118 *ACE2* and *TMPRSS2* in the alveolar epithelium of males, potentially explaining the higher  
119 incidence of SARS in this gender. In addition, we provide evidence that SARS-Cov-2 hijacks the  
120 innate IFN-I and III response and the adaptive IFN-II and NF- $\kappa$ B response to promote its entry  
121 into target cells. We propose that rational combinations of a JAK inhibitor and antivirals may  
122 prevent progression to SARS, whereas combinations of a JAK inhibitor and a NF- $\kappa$ B inhibitor  
123 may exhibit therapeutic efficacy in advanced stage SARS.

124

## 125 **Results**

### 126 ***ACE2* and *TMPRSS2* are Co-Expressed in a Subset of Type I and II Alveolar Epithelial** 127 **Cells in Normal Individuals**

128 To examine if the expression of the canonical SARS-CoV-2 entry factors *ACE2* and *TMPRSS2*  
129 is sexually dimorphic in normal adult lung, we merged three single-cell RNA-Seq datasets for  
130 which gender information was available (14, 34, 35) (Fig. 1A). In total, we analyzed 93,770  
131 single-cell transcriptomes from 9 males and 15 females. Data were integrated by using  
132 Harmony, an algorithm that projects cells into a shared embedding in which cells are grouped  
133 by cell type rather than dataset-specific conditions (36). Samples were finally subjected to  
134 unsupervised graph-based clustering (Fig. 1A).

135 Uniform Manifold Approximation and Projection for Dimension Reduction (UMAP)  
136 revealed that the lung transcriptomes from 24 individuals aggregate in 14 clusters (0-13) (fig.  
137 S1A). Attesting to successful batch correction, there was limited variability in the cluster  
138 distribution of single-cell transcriptomes from the 24 individuals (Fig. 1B). Moreover, the entropy  
139 of mixing the sample batches approximated that of negative controls (fig. S1B). UMAP  
140 visualization and phylogenetic analysis of identity classes using BuildClusterTree indicated that  
141 clusters 0 and 3 and clusters 1 and 7 are closely related (fig. S1C and S1D). Analysis of the  
142 expression of canonical markers of each cell type in the normal lung confirmed this observation  
143 (fig. S1E). Merging the data in these 2 pairs of clusters led to the definition of 12 clusters. Based  
144 on the expression of marker genes, these clusters were annotated as Alveolar Type I (AT1) and  
145 II (AT2) cells, ciliated cells, fibroblasts, endothelial cells from blood vessels or lymphatic vessels,  
146 macrophages, neutrophils, mast cells, plasma cells, and proliferating cells (Fig. 1C and 1D).

147 *TMPRSS2*-mediated cleavage is required for priming the spike S protein of SARS-Cov-2  
148 so that it can bind to *ACE2* and mediate membrane fusion (9). Analysis of the scRNA-Seq  
149 dataset indicated that *ACE2* is expressed only on a small proportion of AT1 and AT2 cells in the  
150 normal lung (~0.5% and ~0.9%, respectively) (Fig. 1E), as anticipated from reverse genetics  
151 studies (11). In contrast, *TMPRSS2* is expressed in a similarly sizeable fraction of AT1 and AT2  
152 cells (~36% and ~37%, respectively) (Fig. 1F). Intriguingly, cells co-expressing *ACE2* and  
153 *TMPRSS2* constituted only a minority of the AT1, AT2, ciliated, and endothelial subsets (Fig.  
154 1G). In fact, only 0.22% of AT1 and 0.44% of AT2 cells co-expressed the SARS-CoV-2 viral  
155 entry receptors. These results suggest that progression to SARS is constrained by the limiting

156 number of alveolar epithelial cells co-expressing viral entry receptors and point to the existence  
157 of signaling mechanisms that elevate their expression.

158

### 159 **The Expression of *ACE2* and *TMPRSS2* is Significantly Higher in Male AT1 and AT2 Cells** 160 **as Compared to their Female Counterparts**

161 Considering the larger incidence of SARS in men as compared to women, we examined the  
162 distribution and level of expression of *ACE2* and *TMPRSS2* in the epithelial and non-epithelial  
163 compartments of the lung in the two genders. A preliminary analysis indicated that the normal  
164 male and female lungs contain similarly sized subpopulations of epithelial and non-epithelial  
165 subsets of cells (fig. S2A). Direct comparison of transcriptional data revealed that the percentage  
166 and level of expression of *ACE2* in AT2 and AT1 cells and *TMPRSS2* in AT1 cells are larger in  
167 males as compared to females (Fig. 2A and 2B). In contrast, male ciliated bronchial cells  
168 expressed lower levels of both *ACE2* and *TMPRSS2* as compared to their female counterpart,  
169 suggesting that the enrichment of viral entry receptors in the lung epithelium of males is specific  
170 to the alveolar epithelial cells (Fig. 2A and 2B). In consonance with this observation, further  
171 analysis indicated that the average level of expression of *ACE2* in individual AT1 and AT2 cells  
172 and *TMPRSS2* in AT1 cells is significantly higher in males as compared to females (Fig. 2C and  
173 2D). Although we observed a trend towards elevated expression of *TMPRSS2* also in male AT2  
174 cells, the difference was not statistically significant (Fig. 2D). Finally, drawing from these  
175 differences in the percentage and level of expression of *ACE2* and *TMPRSS2*, we found that the  
176 alveolar epithelium of males contains approximately twice as many *ACE2*<sup>+</sup> *TMPRSS2*<sup>+</sup> double-  
177 positive AT1 and AT2 cells as compared to its female counterpart (Fig. 2E). In agreement with  
178 prior observations, smokers possessed a larger number of *ACE2*<sup>+</sup> *TMPRSS2*<sup>+</sup> double-positive  
179 AT2 cells as compared to non-smokers (fig. S2B) (37). In addition, individuals aged 65 or more  
180 also exhibited more double-positive AT1 and AT2 cells, but the results did not reach statistical  
181 significance. These observations suggest that the alveolar epithelium of normal adult males  
182 contains a significantly larger number of cells potentially sensitive to SARS-Cov-2 infection as  
183 compared to its female counterpart.

184 To examine the cell-type specificity of the sexually dimorphic expression of viral entry  
185 receptors, we analyzed available single-cell datasets from organs that can be infected by SARS-  
186 CoV2 (27, 38-41). The results indicated that the expression of *ACE2* and *TMPRSS2* in epithelial



187 and non-epithelial subsets of the colon, esophagus, and stomach does not vary to a significant  
188 degree between sexes (data not shown). We also did not detect gender-based differences in the  
189 expression of *ACE2* and *TMPRSS2* in circulating leukocyte subsets (data not shown) (42).  
190 Finally, analysis of a single cell dataset from the lungs of patients with COVID-19 (27) indicated  
191 that the expression of viral entry receptors is restricted to epithelial cells, macrophages, and T  
192 cells (fig. S2C). As previously reported (29, 43), the epithelial compartment of the lungs from  
193 COVID-19 patients exhibited elevated expression of *ACE2* but not *TMPRSS2* as compared to  
194 its normal counterpart (fig. S2D and S2E). These observations indicate that the male-  
195 predominant expression of *ACE2* and *TMPRSS2* is restricted to the alveolar epithelium.

196 Recently, it has been proposed that SARS-CoV-2 can enter into certain cell types by  
197 combining with a soluble form of *ACE2* (sACE2) in the extracellular space. The virus-sACE2  
198 complex would then undergo receptor-mediated endocytosis by binding to vasopressin and  
199 thereby to its receptor AVPR1B or by binding directly to the angiotensin II receptor type 1 (AT1,  
200 *AGTR1*) (44). Interestingly, scRNA-seq indicated that neither AT1 nor AT2 cells express  
201 detectable levels of *AVPRB1* or *AGTR1* (fig. S2F and S2G). Consistently, an analysis of datasets  
202 from multiple organs confirmed that these receptors are expressed in the kidney and heart, but  
203 not in the lung (NCBI). Finally, qPCR analysis showed that primary human lung alveolar epithelial  
204 cells (AEpiC) express low levels of *AVPRB1* or *AGTR1*, in fact, several-fold lower as compared  
205 to those of *TMPRSS2* (fig. S2H). These results confirm that the major viral entry receptors on  
206 alveolar epithelial cells are *ACE2* and *TMPRSS2* and indicate that their elevated expression in  
207 males could engender a higher sensitivity to SARS-CoV2 infection.

208

## 209 **Sexually Dimorphic Interferon Signaling Potentially Controls the Expression of *TMPRSS2*** 210 **and *ACE2* in Alveolar Epithelial Type I and II Cells**

211 It has been proposed that the AR promotes the expression of *TMPRSS2* in the male lung  
212 epithelium, whereas the ER attenuates the expression of *ACE2* in its female counterpart (19, 45,  
213 46). To examine the regulatory regions governing the expression of *TMPRSS2* and *ACE2* in  
214 tissues that may be infected by SARS-Cov-2, we examined the Encyclopedia of DNA Elements  
215 (ENCODE) compendium. Analysis of the binding profiles for H3K27ac and H3K4me3 identified  
216 one upstream enhancer (1) and two distal enhancers (2 and 3) associated with *TMPRSS2* (fig.  
217 S3A). Intriguingly, we found that enhancer 1, which corresponds to the classical AR-regulated



218 enhancer active in the prostate gland, is also active in the transverse colon but not in the lung.  
219 In contrast, the newly identified enhancers 2 and 3 are active in the lung and, individually, in the  
220 thoracic aorta and coronary artery or the liver, respectively (fig. S3A). A similar analysis of *ACE2*  
221 revealed a single intronic enhancer active in the lung and transverse colon (fig. S3B). Analysis  
222 of the promoter and enhancers of *TMPRSS2* and *ACE2* identified consensus sequences for  
223 binding to several transcription factors (TFs), which were ranked based on the best fit for binding.  
224 This analysis revealed optimal consensus binding sites for STAT1 (GAS motifs), STAT1/2 (ISRE  
225 motifs), various Interferon Response Factors (IRFs), and NF- $\kappa$ B in the regulatory regions of both  
226 *TMPRSS2* and *ACE2* (Fig. 3A and 3B), suggesting that IFN and NF- $\kappa$ B signaling regulates the  
227 expression of viral entry receptors.

228 To functionalize this information, we conducted Gene Set Enrichment Analysis (GSEA)  
229 of the TF signatures enriched in male as compared to female AT1 and AT2 cells and identified  
230 several sexually dimorphic signatures expressed in AT1 and AT2 cells (Fig. 3C and 3D).  
231 Remarkably, STAT1, STAT1/2, various Interferon Response Factors (IRFs), and NF- $\kappa$ B were  
232 the only TFs that coordinated a gene expression program enriched in male alveolar epithelium  
233 and had binding sites in the promoter and enhancers of *TMPRSS2* and *ACE2* (Fig. 3E-G). In  
234 contrast, although we did not identify statistically significant differences in the expression of  
235 hormone receptors (*AR*, *ESR1*, *ESR2*) between male and female AT1 and AT2 cells, we noted  
236 a trend toward gender divergent expression (fig. S3C and S3D). In addition, although canonical  
237 AR signatures were enriched in male AT1 and AT2 cells, the results did not reach statistical  
238 significance (fig. S3E). Finally, the ER\_nongenomic\_pathway signature was the only ER-related  
239 signature enriched in female AT1 or AT2 cells (fig. S3F). These results suggest that IFN and  
240 NF- $\kappa$ B signaling are preferentially activated in normal male AT1 and AT2 cells *in vivo* as  
241 compared to their female counterpart; in contrast, AR signaling is inactive or weakly activated in  
242 these cells.

243 To corroborate these findings, we examined the enrichment of signatures from the  
244 Hallmark\_gene\_set, the Canonical\_pathway\_gene\_set, and the GO\_BP\_gene\_set in male  
245 versus female AT1 and AT2 cells. We found that several immune and inflammatory signatures  
246 are selectively enriched in male AT1 and AT2 cells. Importantly, signatures reflective of  
247 heightened IFN signaling featured amongst the top upregulated in male AT1 and AT2 cells as  
248 compared to their female counterparts (fig. S4A-F). Direct analysis of several signatures

249 reflective of IFN signaling, including the HALLMARK\_INTERFERON\_ALPHA\_RESPONSE  
250 signature, indicated that they are enriched in male AT1 and AT2 cells as compared to their  
251 female counterparts (Fig. 4A-D). Examination of the expression of several IFN signaling target  
252 genes confirmed their differential expression in the distal lung epithelium in the two genders (Fig.  
253 4E, 4F, S4G, and S4H). Taken together, these findings suggest that sexually dimorphic IFN  
254 signaling controls the expression of SARS-CoV-2 entry receptors in the alveolar epithelium.

255

## 256 **Type I Interferon Signaling Upregulates the Expression of *ACE2* and *TMPRSS2* in** 257 **Pulmonary Alveolar Epithelial Cells**

258 To directly test the hypothesis that *ACE2* and *TMPRSS2* are IFN target genes in lung epithelium,  
259 we initially surveyed the expression of IFN receptors and JAK family kinases in primary human  
260 lung alveolar epithelial cells (AEpiC). qPCR indicated that these cells express IFNAR1, IFNAR2,  
261 IL-10R $\beta$ , IFNGR1, IFNGR2, JAK1, TYK2, and lower levels of IFNLR1 and JAK2, suggesting that  
262 they can be stimulated by IFN-I ( $\alpha$ ,  $\beta$ ), II ( $\gamma$ ) and III ( $\lambda$ ) (fig. S5A, S5B and S5C). Immunoblotting  
263 indicated that 20 nM IFN $\alpha$  promotes phosphorylation and accumulation of STAT1 and 2 in AEpiC  
264 cells, consistent with the finding that STAT1 and 2 are IFN target genes (47, 48). Tofacitinib,  
265 which preferentially inactivates JAK1 as compared to JAK2 and 3 and inhibits TYK2 much less  
266 efficiently (49), reversed both the phosphorylation and the accumulation of STAT1 and 2 (Fig.  
267 5A). These results are consistent with the conclusion that IFN $\alpha$ -stimulated JAK-STAT signaling  
268 proceeds via the IFNAR1/2 heterodimer and associated JAK1/TYK2 kinases in AEpiC cells.

269 To examine the capacity of IFN and androgen to regulate *ACE2* and *TMPRSS2*  
270 expression, we performed qPCR assays with LNCaP prostate adenocarcinoma cells, Calu-3  
271 lung adenocarcinoma cells, and AEpiC cells, which were treated with IFN $\alpha$  (20 nM), androgen  
272 (10 nM DHT), or a combination of the two. Of note, the AEpiC cells consist of AT2 and, to a  
273 smaller extent, AT1 cells (50). The results indicated that DHT induces expression of *TMPRSS2*  
274 within 16 hours in LNCaP cells, as anticipated (Fig. 5B and 5C, left panel). However, DHT did  
275 not promote rapid expression of either *ACE2* or *TMPRSS2* in Calu-3 or AEpiC cells and  
276 treatment with the potent AR inhibitor enzalutamide (5  $\mu$ M) did not reduce their level of  
277 expression in unstimulated cells (Fig. 5B and 5C, middle and right panels, and S5D). Notably,  
278 treatment with DHT did not enhance, but instead suppressed IFN $\alpha$ 's induction of *TMPRSS2* in

279 Calu-3 and AEpiC. In contrast, IFN $\alpha$  induced expression of both *ACE2* and *TMPRSS2* in these  
280 two cell lines (Fig. 5B and 5C, middle and right panels). These results provide direct evidence  
281 that IFN signaling elevates the expression of SARS-CoV-2 entry receptors in lung alveolar  
282 epithelium. In addition, the lack of response to enzalutamide in AEpiC cells indicates that  
283 *TMPRSS2* is not an AR target gene in alveolar epithelial cells.

284 To examine the mechanism through which IFN signaling induces expression of  
285 *TMPRSS2*, we performed chromatin immunoprecipitation (ChIP)-qPCR assays using AEpiC  
286 cells treated with either IFN- $\alpha$ , DHT, or the combination. The results revealed that activated  
287 STAT1 (P-STAT1) binds to the promoter and enhancer 2 of *TMPRSS2* in IFN $\alpha$ - but not DHT-  
288 stimulated cells (Fig. 5D). This event was accompanied by a decrease of the suppressive mark  
289 H3K27me3, an increase of the activation mark H3K4me3, and a selective enrichment of  
290 activated Pol II (S2P-Pol II) at the promoter of *TMPRSS2* (Fig. 5E). Notably, treatment with DHT  
291 decreased the binding of P-STAT1 to the promoter and enhancer 2 of *TMPRSS2* and  
292 transcriptional activation of the gene in response to IFN (Fig. 5D,5E and S5E) and ChIP-qPCR  
293 assays indicated that this suppression did not involve direct binding of the AR to the lung-active  
294 enhancers or the promoter of *TMPRSS2* (fig. S5F). Therefore, IFN stimulation induces binding  
295 of activated STAT1 to the enhancer 2 and promoter of *TMPRSS2* and transcriptional activation  
296 of the gene. In contrast, DHT stimulation interferes with the IFN-stimulated expression of  
297 *TMPRSS2*.

298 By performing similar ChIP-qPCR assays, we found that P-STAT1 binds also to the  
299 promoter and intronic enhancer *ACE2* in IFN $\alpha$ -stimulated AEpiC cells and induces de-repression  
300 and transcriptional activation of the promoter (Fig. 5F and 5G). Interestingly, treatment with DHT  
301 decreased the binding of P-STAT1 to the promoter and enhancer of *ACE2* and transcriptional  
302 activation of the gene in response to IFN (Fig. 5F and G) as we had observed for *TMPRSS2*.  
303 However, ChIP-qPCR assays indicated that this suppression involved direct binding of the AR  
304 to the lung-active intronic enhancer and the promoter of *ACE2* (fig. S5G). These findings indicate  
305 that IFN signaling promotes the binding of P-STAT1 to the promoter and lung-specific enhancers  
306 of both *TMPRSS2* and *ACE2*, corroborating the hypothesis that sexually dimorphic IFN signaling  
307 leads to elevated levels of SARS-Cov-2 entry receptors in the male alveolar epithelium. In  
308 contrast, androgen does not exert these effects in lung epithelium.

309

## 310 **IFN-I and III Conspire to Upregulate the Expression of *ACE2* and *TMPRSS2* and Induce** 311 **Robust Viral Entry**

312 To identify the types of interferon that upregulates *ACE2* and *TMPRSS2* expression, we  
313 examined the effects of IFN-I (IFN $\alpha$  and IFN $\beta$ ), IFN-II (IFN $\gamma$ ) and IFN-III (IFN $\lambda$ ) on the expression  
314 of *ACE2* and *TMPRSS2* in AEpiC cells. qPCR indicated that IFN $\beta$  and  $\gamma$  induce higher expression  
315 of *ACE2* as compared to IFN $\alpha$  and  $\lambda$  (Fig. 6A). In contrast, IFN $\lambda$  induced higher expression of  
316 *TMPRSS2* as compared to IFN $\beta$ , and IFN $\alpha$  and  $\gamma$  proved ineffective (Fig. 6B).  
317 Immunofluorescent staining of non-permeabilized Calu-3 cells and qPCR analysis corroborated  
318 the preferential upregulation of *ACE2* by IFN $\alpha$  and *TMPRSS2* by IFN $\lambda$  (Fig. 6C, S6A, and S6B).  
319 Immunoblotting analysis revealed that IFN $\alpha$  and IFN $\lambda$  induce activation of JAK1 and TYK2 and,  
320 downstream, phosphorylation of STAT1 and 2 and formation of the ISGF3 complex (fig. S6C).  
321 As anticipated by JAK2's exclusion from type I and type III IFN-Rs (51), IFN $\alpha$  and IFN $\lambda$  did not  
322 induce its activation (fig. S6C, right). Consistent with their ability to engage molecularly distinct  
323 receptors, IFN $\alpha$  and IFN $\lambda$  induced JAK-STAT signaling with divergent kinetics: rapid for IFN $\alpha$   
324 and delayed for IFN $\lambda$  (fig. S6C). Nevertheless, the two cytokines induced the accumulation of  
325 the proteins encoded by their target genes *STAT1* and *STAT2* with a similar kinetics (fig. S6C  
326 and S6D). Consistent with the low constitutive level of expression and the kinetics of  
327 accumulation of the *ACE2* mRNA in response to IFN $\alpha$  or  $\lambda$  (Fig. 6A), the canonical 75 kD  
328 membrane-anchored form of *ACE2* was not detectable in untreated cells but was robustly  
329 induced at 12 hours and reached plateau expression at 24 hours. In contrast, *TMPRSS2* was  
330 expressed under basal conditions but increased and reached plateau expression following the  
331 same kinetics as *ACE2* (fig. S6C). Combinations of IFN $\alpha$  and IFN $\beta$  and triple combinations  
332 including IFN $\lambda$  or  $\gamma$  did not stimulate expression of *ACE2* more than either IFN $\alpha$  or IFN $\beta$  alone  
333 (about 25-fold over control for both IFN $\alpha$  or IFN $\beta$ ). Conversely, combinations of IFN $\lambda$  with IFN $\alpha$   
334 or IFN $\beta$  and triple combinations including IFN $\gamma$  did not induce higher expression of *TMPRSS2*  
335 as compared to IFN $\lambda$  alone (about 4-fold over control for IFN $\lambda$ ) (fig. S6E). In addition, treatment  
336 with JAK inhibitors such as fedratinib, ruxolitinib and tofacitinib, but not prednisone  
337 (corticosteroid), camostat or nafamostat (protease inhibitors) inhibited the IFN $\alpha$  dependent  
338 induction of *ACE2* and *TMPRSS2* (Fig. 6D). Together with the results of ChIP studies, these  
339 results provide strong evidence that *ACE2* and *TMPRSS2* are IFN target genes and that *ACE2*  
340 is predominantly controlled by IFN-I and *TMPRSS2* by IFN-III.

341 IFN-I and III cooperate to restrict viral infection of epithelial cells, including those lining  
342 the airways of the lung. Newly infected cells produce IFNs in response to activation of pattern  
343 recognition receptors, including cGAS-STING (51, 52). To examine if activation of such  
344 pathways and, hence endogenous production of IFNs, can upregulate expression of *ACE2* and  
345 *TMPRSS2* in alveolar epithelial cells, we initially transduced dsDNA or LPS into AEpiC cells.  
346 qPCR revealed that dsDNA induces expression of both entry receptors, but LPS only  
347 upregulates *TMPRSS2* (Fig. 6E). Since LPS is recognized by the Toll-like Receptor 4 (TLR4),  
348 which predominantly impinges on NF- $\kappa$ B signaling, the latter observation implies that *TMPRSS2*  
349 may be induced also by NF- $\kappa$ B (53). To better model the effect of the viral RNA of SARS-CoV-  
350 2, we used Poly IC. As shown in Figure 6F, poly IC rapidly induced expression of *ACE2* and  
351 *TMPRSS2*, suggesting that initial viral entry stimulates expression of viral entry receptors,  
352 potentially facilitating the entry of additional viruses. The expression of *ACE2* and *TMPRSS2*  
353 induced by Poly IC was suppressed by treatment of the cells with an inhibitor of TBK kinase  
354 (GSK8612), which controls expression of IFNs via NF- $\kappa$ B (54), the JAK1/2 and TYK2 inhibitor  
355 ruxolitinib (49) and the NF- $\kappa$ B inhibitor BAY-11-70-82 (55)(Fig. 6G). This pattern of inhibition is  
356 consistent with the signaling mechanisms that enable cGAS-STING to induce the expression of  
357 IFNs. Together, these observations suggest that SARS-CoV2 exploits the ability of its RNA to  
358 induce the production of IFN to radically increase the expression of its entry receptors on alveolar  
359 epithelial cells.

360 To determine if IFN can enhance the entry of SARS-CoV2 into alveolar epithelium, we  
361 used replication-defective lentiviral particles bearing coronavirus S proteins. Pseudotyped viral  
362 particles have been shown to enter into cells by binding to *ACE2* and *TMPRSS2* (9). Firstly, we  
363 tested if knocking down *ACE2* and *TMPRSS2* could hinder the entry of SARS-2S pseudotyped  
364 lentivirus in CALU3 cells. As show in Figure S6F and S6G, reduced expression of either one of  
365 the receptors significantly reduced the viral entry. We then stimulated AEpiC cells with IFN $\alpha$  for  
366 16 hours and infected them with LVM-SARS-CoV-2\_S, a SARS-2S pseudotyped lentivirus  
367 encoding luciferase. Stimulation with IFN $\alpha$  increased viral entry by 3-fold, and pre-treatment with  
368 the *TMPRSS2* protease inhibitors camostat and nafamostat inhibited it, confirming the  
369 dependency of this process on S protein binding and activation by *TMPRSS2* (Fig. 6H). Pre-  
370 treatment with the JAK inhibitors tofacitinib and ruxolitinib also suppressed the entry of the virus  
371 induced by IFN (Fig. 6H). To model the microenvironment of the early infection of alveolar



372 epithelium, we repeated the experiment by exposing the AEpiC cells to a mixture of IFN $\alpha$  and  
373 IFN $\lambda$ . In agreement with its capacity to induce maximal expression of both ACE2 and TMPRSS2,  
374 the combination promoted a 5-fold increase in viral entry, which was largely reversed by  
375 ruxolitinib (Fig. 6I). These findings suggest that IFN-I and IFN-III can substantially upregulate the  
376 expression of viral entry receptors during the early phase of infection of the alveolar epithelium  
377 and that JAK inhibitors can interfere with this process.

378

### 379 **TNF $\alpha$ Models Severe SARS-COV2 Disease and Cytokine Storm in Pulmonary Alveolar** 380 **Epithelial Cells**

381 To model the effect of cytokines present in the lung of COVID-19 patients affected by advanced  
382 lung disease, we tested IFN $\gamma$ , TNF $\alpha$ , and additional cytokines, which have been found to  
383 correlate with or participate in disease progression (56-59). Notably, TNF $\alpha$  induced expression  
384 of *TMPRSS2* but not *ACE2*, whereas IFN $\gamma$  induced expression of *ACE2* but not *TMPRSS2*. The  
385 two cytokines in combination did not exert a higher effect as compared to either one singly (Fig.  
386 7A and S7A). None of the 14 additional cytokines tested induced a significant increase in the  
387 expression of *ACE2* or *TMPRSS2* (fig. S7B). Whereas the IFN $\gamma$  receptor signals via JAK1/2 and  
388 STAT3, the TNF $\alpha$  receptor signals predominantly through activation of NF- $\kappa$ B (51, 60).  
389 Accordingly, ChIP experiments revealed that IFN $\gamma$  promotes the binding of p-STAT3 to the  
390 enhancer and promoter of *ACE2* but not of *TMPRSS2* (Fig. 7B and S7C). In contrast, TNF $\alpha$ -  
391 promotes binding of the NF- $\kappa$ B-p65 complex to the enhancer and promoter of *TMPRSS2* but not  
392 of *ACE2* (Fig. 7C and S7C). These findings indicate that at concentrations inferior to those  
393 inducing inflammatory cell death (56), TNF $\alpha$  and IFN $\gamma$  induce a robust upregulation of SARS-  
394 CoV-2 entry receptors in the alveolar epithelium.

395 We next asked if inhibition of JAK-STAT and NF- $\kappa$ B signaling would suppress the  
396 expression of *ACE2* and *TMPRSS2* induced by a combination of IFN $\gamma$  and TNF $\alpha$ . Notably, BAY-  
397 11-7082 suppressed the expression of *ACE2* induced by IFN $\gamma$  or IFN $\gamma$  and TNF $\alpha$ , but the JAK1  
398 inhibitor tofacitinib did not (Fig. 7D). While the inhibition of the effect of IFN $\gamma$  by BAY-11-7082  
399 may arise from the crosstalk between IRF, NF- $\kappa$ B, and JAK-STAT pathways (61), the inability of  
400 tofacitinib to block the effect of IFN $\gamma$  was unexpected. We therefore tested optimal concentrations  
401 of tofacitinib (JAK1i), fedratinib (JAK2i), and ruxolitinib (JAK1/2i) and found that only the latter

402 two compounds suppress the upregulation of ACE2 induced by IFN $\gamma$  (Fig. 7E). These results  
403 suggest that the upregulation of ACE2 induced by IFN $\gamma$  depends more on JAK2 than JAK1 under  
404 our experimental conditions. As anticipated, BAY-11-7082 suppressed the expression of  
405 *TMPRSS2* induced by TNF $\alpha$  and tofacitinib inhibited that induced by IFN $\gamma$  (Fig. 7D). These  
406 results suggest that combined inhibition of JAK-STAT and NF- $\kappa$ B signaling may inhibit the  
407 expression of SARS-CoV-2 entry receptors induced by TNF $\alpha$  and IFN $\gamma$  during the cytokine storm  
408 that typifies advanced disease.

409 We finally reasoned that IFN $\alpha$  and  $\lambda$  would continue to be produced during advanced  
410 disease as long as new alveolar epithelial cells are infected. We therefore asked if a combination  
411 of IFN $\alpha$  and  $\lambda$  and TNF $\alpha$  could promote a simultaneous and substantial upregulation of both  
412 ACE2 and *TMPRSS2*. Notably, we found that the triple combination induces higher expression  
413 of both *TMPRSS2* and ACE2 as compared to all double combinations or each cytokine alone  
414 (Fig. 7F). Moreover, the triple combination was superior to the combination of IFN $\gamma$  and TNF $\alpha$   
415 (Fig. 7A and 7F). Intriguingly, the NF- $\kappa$ B inhibitor BAY-11-7082 or the JAK inhibitor ruxolitinib  
416 substantially inhibited the entry of SARS-2S pseudotyped lentivirus into AEpiC cells stimulated  
417 with IFN $\alpha$  and  $\lambda$  and TNF $\alpha$ . When used in combination, the two inhibitors completely suppressed  
418 viral entry (Fig. 7G). These results demonstrate that IFNs and TNF $\alpha$  substantially upregulate  
419 ACE2 and *TMPRSS2* during severe disease and the combined inhibition of their signaling  
420 pathways may ameliorate disease progression.

421



## 422 Discussion

423  
424 In this study, we provide evidence that sexually dimorphic IFN and, possibly, NF- $\kappa$ B signaling  
425 upregulates expression of the viral entry receptors ACE2 and TMPRSS2 in male alveolar type I  
426 and II cells, potentially explaining why progression to SARS occurs much more frequently in this  
427 gender. Examination of primary alveolar epithelial cells indicates that IFN-I and III, which are  
428 involved in the protective immunity of epithelial surfaces (62, 63), dramatically upregulate the  
429 expression of *ACE2* and *TMPRSS2* and facilitate viral entry of an S protein-pseudotyped virus.  
430 TNF- $\alpha$  and IFN $\gamma$ , which are produced during the cytokine storm associated with the lethal phase  
431 of the disease (64), upregulate the entry receptors by a similar amplitude. Finally,  
432 pharmacological inhibition of JAK1/2 or both JAK1/2 and NF- $\kappa$ B suppressed viral entry of the  
433 pseudotyped virus in cells stimulated with optimal combinations of IFNs or with TNF $\alpha$  and IFN $\gamma$ ,  
434 respectively. In addition to providing a potential explanation for the predominance of severe  
435 disease in men, these results indicate that SARS-Cov-2 hijacks viral immunity mechanisms to  
436 facilitate viral spreading and suggests novel and distinct therapeutic strategies for the prevention  
437 and treatment of SARS.

438         Recent studies using long-term human distal lung organoids have consolidated the view  
439 that SARS-CoV-2 can productively infect AT2 cells, resulting in an innate immune response, cell  
440 death and downregulation of surfactant expression (16, 65, 66). Upon examining a combined  
441 single-cell RNA-seq dataset consisting of 93,770 transcriptomes from 24 normal individuals, we  
442 found that *ACE2* is expressed in only a very small proportion of AT1 and, as previously reported  
443 (11, 15), AT2 cells (<1%). In contrast, *TMPRSS2* is expressed in a large fraction of both cell  
444 types (ca. 36%). Since approximately 50% of *ACE2*<sup>+</sup> cells also express *TMPRSS2*, double-  
445 positive AT1 and AT2 cells are extremely rare in the normal lung (0.22% and 0.44%,  
446 respectively). We thus posited that additional signaling mechanisms upregulate the expression  
447 of *ACE2* and *TMPRSS2* in these cells and thereby facilitate initial viral entry as well as the  
448 progression of the infection, especially in the face of protective innate immunity mechanisms.

449         The mechanisms underlying the male prevalence of SARS are poorly understood.  
450 Intriguingly, we found that the expression of *ACE2* and *TMPRSS2* is significantly higher in  
451 normal alveolar epithelial cells from males as compared to females. Previous studies have  
452 shown that women mount more robust immune responses against viruses and vaccines and  
453 exhibit superior immune-mediated tissue repair as compared to males (33). In addition, clinical

454 studies have shown that male patients with moderate COVID-19 have defective T cell responses  
455 that correlate with disease severity (30). While it is likely that differences in immune responses  
456 between the genders contribute to the higher disease severity in males, our finding that males  
457 possess about twice as many ACE2+ and TMPRSS2+ AT1 and AT2 cells as compared to  
458 females suggests that the male alveolar epithelium is more prone to SARS-CoV-2 infection  
459 because it contains a larger number of cells co-expressing the viral entry receptor and co-  
460 receptor.

461 Analysis of the ENCODE database identified distal enhancers of *ACE2* and *TMPRSS2*  
462 active in lung tissue. In contrast, the canonical AR-regulated enhancer of *TMPRSS2*, which is  
463 active in prostate epithelial cells, is located proximally and was not active in the lung.  
464 Transcription factor binding motif and GSEA suggested that several JAK-activated transcription  
465 factors, including STAT1 and 2, and IFN-induced transcription factors, including IRF1, are  
466 induced and bind to these novel enhancers and the promoter of *TMPRSS2* and *ACE2* to a larger  
467 extent in male AT1 and AT2 cells as compared to their female counterparts. In contrast, we did  
468 not detect a statistically significant difference in the level of expression or activity of AR between  
469 male and female AT1 and AT2 cells. Provocatively, GSEA revealed that several IFN-regulated  
470 signatures are amongst the top upregulated in male AT1 and AT2 cells as compared to their  
471 female counterparts. Consistently, several canonical IFN target genes were expressed at higher  
472 levels in male AT1 and AT2 cells as compared to their female counterpart. These results suggest  
473 that both *ACE2* and *TMPRSS2* are IFN target genes in alveolar epithelial cells and that sexually  
474 dimorphic IFN signaling leads to higher levels of expression of both viral entry receptors in males,  
475 potentially explaining the increased susceptibility of males to SARS.

476 To directly confirm these findings, we examined the effect of IFN signaling on the  
477 expression of *ACE2* and *TMPRSS2* in primary human lung alveolar epithelial cells. We found  
478 that these cells respond to stimulation with IFN $\alpha$  by activating STAT1 and STAT2 in a JAK-  
479 dependent manner. Consistent with the notion that STAT1 and 2 are not only transcriptional  
480 activators but also target genes in the IFN signaling pathway (47, 48), IFN $\alpha$  robustly activated  
481 their expression, providing a feed-forward mechanism for amplification of signaling in the  
482 alveolar epithelium. Notably, treatment of human lung alveolar epithelial cells with IFN $\alpha$   
483 promoted binding of p-STAT1 to the promoter and the enhancer of *ACE2*, transcriptional  
484 activation of the gene, and expression of *ACE2*. Similarly, IFN $\alpha$  induced binding of p-STAT1 to

485 the promoter and the lung-active distal enhancer of *TMPRSS2*, transcriptional activation of the  
486 gene, and expression of *TMPRSS2*. In contrast, treatment with androgen did not stimulate  
487 expression of the two entry receptors; in fact, it interfered with IFN-induced p-STAT1 binding to  
488 the regulatory elements of *ACE2* and *TMPRSS2* and therefore reduced their expression.  
489 Moreover, we found that the second-generation AR inhibitor enzalutamide does not reduce the  
490 expression of *ACE2* and *TMPRSS2* in primary alveolar epithelial cells. In fact, enzalutamide  
491 increased the expression of *TMPRSS2* in these cells, presumably by interfering with the ability  
492 of autocrine IFN signaling to induce STAT1/2 binding to the promoter and distal enhancer of  
493 *TMPRSS2*. Together, our results demonstrate that IFN signaling upregulates the expression of  
494 viral entry receptors in primary alveolar epithelial cells. Notably, these conclusions are not  
495 consistent with the previously held view that androgen contributes to the regulation of *TMPRSS2*  
496 in the distal lung, which was based on indirect evidence (21), retrospective clinical associations  
497 (22), or mechanistic studies in prostate cancer LNCaP cells (67).

498 Although alveolar epithelial cells express type I, II, and III IFN-Rs, IFN $\alpha$  and  $\beta$  induce  
499 expression of *ACE2* to a much larger extent (>20 fold over control) as compared to other IFNs.  
500 In contrast, IFN $\lambda$  is the most potent inducer of *TMPRSS2* (>7 fold over control). Since the basal  
501 expression of *ACE2* is much lower than that of *TMPRSS2*, co-stimulation with type I and II IFN  
502 induces a relative overexpression of *TMPRSS2* as compared to *ACE2*, suggesting that multiple  
503 *TMPRSS2* co-receptors may assist a single *ACE2* receptor in mediating viral entry in alveolar  
504 epithelial cells. It is hypothesized that initial viral entry into naïve epithelial cells induces  
505 expression of both type I and III IFNs through pattern recognition receptors (62, 63). Intriguingly,  
506 we found that transduction of Poly IC, mimicking viral RNA, robustly upregulates the expression  
507 of *ACE2* and *TMPRSS2* in alveolar epithelial cells, suggesting that viral entry and the ensuing  
508 liberation of viral RNA into the cytoplasm can induce production of IFNs and upregulation of viral  
509 entry receptors in a feed-forward mechanism. Importantly, our results also suggest that secreted  
510 type I and III IFN will upregulate the expression of viral entry receptors in adjacent epithelial  
511 cells, facilitating their infection. Consistent with the role of JAK-STAT signaling in this process,  
512 type I and III IFN stimulated entry of an S protein-pseudotyped virus in alveolar epithelial cells  
513 and JAK inhibitors reversed this process. These results suggest that JAK inhibitors may be  
514 effective in preventing the transition of COVID-19 disease to SARS in addition to ameliorating  
515 disease progression in SARS patients, as suggested by recent clinical trials (68, 69).

516 The cytokine shock syndrome often underlies the progression of SARS-CoV-2 to the  
517 lethal stage (64). We found that TNF $\alpha$  upregulates the expression of TMPRSS2, whereas INF $\gamma$   
518 controls the expression of ACE2. In contrast, 14 other cytokines potentially involved in the  
519 cytokine storm do not affect the expression of either one of the two viral entry receptors.  
520 Consistent with the prominent role of NF- $\kappa$ B in TNF $\alpha$  receptor signaling and JAK-STAT3 in INF $\gamma$   
521 signaling (70, 71), a combination of the IKK/NF- $\kappa$ B inhibitor BAY-11-7082 and the JAK inhibitor  
522 ruxolitinib completely suppressed viral entry induced by the combination of TNF $\alpha$  and INF $\gamma$  in  
523 alveolar epithelial cells. Intriguingly, prior studies have indicated that the combination of TNF $\alpha$   
524 and INF $\gamma$  can induce PANoptosis (inflammatory cell death) of epithelial cells and promotes death  
525 in mice infected with SARS-CoV2 (56). Our results suggest that the ability of TNF $\alpha$  and INF $\gamma$  to  
526 upregulate entry receptors and promote further spreading of the virus in infected cells may  
527 potentiate the toxic effect of the cytokine storm on lung epithelial cells. Irrespective of the relative  
528 contribution of viral spreading and cytokine toxicity to disease progression, our results suggest  
529 that combinations of JAK inhibitors and clinically approved NF- $\kappa$ B inhibitors, such as salicylates  
530 (72), should be tested in the advanced stage of COVID-19.

531 Recent studies have shown that even single virions can productively infect AT2 cells in  
532 alveolar organoids. Notably, whereas high levels of IFN limit further infection, resulting in modest  
533 viral burden, low levels of IFN exerts the opposite effect, suggesting that IFN signaling can exert  
534 a bimodal effect depending on its dose (16, 66). We propose that viral mechanisms enable newly  
535 infected cells to titrate the production of type I and III IFNs to a level that is insufficient to mediate  
536 viral restriction but is sufficient to upregulate viral entry receptors. Consistently, it has been  
537 observed that SARS-CoV-2 infection drives lower antiviral transcription marked by low IFN-I and  
538 IFN-III levels as compared to common respiratory viruses (73). By necessity, most of the studies  
539 on viral proteins suppressing IFN signaling have been conducted by using overexpression of  
540 individual viral genes and, thus, cannot provide definitive information on the level of IFN signaling  
541 induced in naturally infected cells (74-78). Future studies using a recently developed *trans*-  
542 complementation system will contribute to a better understanding of how SARS-CoV-2 fine-  
543 tunes IFN signaling to facilitate its spreading in the host (79). We further propose that type I IFN  
544 immunity plays a similar bimodal role also in late-stage disease. In fact, it has been reported that  
545 inborn errors of IFN-I immunity or autoantibodies to IFN-I are present, at a low rate, in patients  
546 with a life-threatening disease, but they are completely absent in those with mild disease (80,

547 81). In contrast, immunophenotyping of patients suggest that that the IFN-I response exacerbate  
548 inflammation in severe COVID-19 (28) and IFN-I and III disrupt lung epithelial repair during  
549 recovery from viral infection (82).

550 In conclusion, our study indicates that sexually dimorphic IFN-I and III signaling  
551 upregulates the expression of the SARS-CoV-2 entry receptors *ACE2* and *TMPRSS2* in lung  
552 alveolar epithelium, providing a potential mechanism for the male-biased incidence of SARS in  
553 COVID-19 patients. We also demonstrate that SARS-CoV-2 hijacks IFN-I and III signaling to  
554 upregulate the viral entry receptors and hence facilitate viral spreading during initial infection of  
555 the alveolar epithelium. Furthermore, induced as components of the cytokine storm, TNF- $\alpha$  and  
556 IFN-II produce a similar upregulation of viral entry receptors and a direct cytopathic effect during  
557 the late phase of the disease. Based on these results, we suggest that JAK1/TYK2 inhibitors,  
558 such as ruxolitinib, may be used in conjunction with antivirals to halt viral spread from the upper  
559 respiratory tract to the distal lung, reducing the incidence of SARS. Furthermore, combinations  
560 of JAK1/2, such as baricitinib, and NF- $\kappa$ B inhibitors, such as salicylate, may be more efficacious  
561 as compared to current treatments during advanced SARS in COVID-19. In addition to informing  
562 our ongoing understanding of COVID-19 pathophysiology, these findings suggest novel  
563 therapeutic strategies and regimens for the prevention and treatment of COVID-19 SARS.

564 We were unable to include several scRNAseq datasets in this study due to unavailability  
565 of sex information. Our results on sexually dimorphic IFN signaling and expression of *ACE2* and  
566 *TMPRSS2* in alveolar epithelial cells are therefore based on a comparison of a relatively small  
567 number of individual samples. In addition, we did not validate these results by using an  
568 independent approach. Finally, although our results suggest that SARS-Cov-2 does not  
569 suppress IFN signaling in infected cells as profoundly as other viruses, this model will need to  
570 be validated by using the wild-type virus or a trans-complementation system.

571

572

573

574

575

576



## 577 **Methods**

### 578 **Study Design**

579 We have used public scRNAseq datasets to compare the level of expression of SARS-CoV-2  
580 entry receptors in male and female lung alveolar epithelial cells. By using transcription factor  
581 binding motif analysis and gene set enrichment analysis, we have then identified the signaling  
582 pathways potentially able to regulate the expression of TMPRSS2 and ACE2 in alveolar type I  
583 and II cells. To confirm these observations, we have examined the ability of IFN and NF $\kappa$ B  
584 signaling to elevate the expression of both entry receptors in primary alveolar epithelial cells by  
585 using ChIP-Q-PCR, Q-PCR, and immunoblotting with antibodies to activated JAK and STAT  
586 isoforms. Finally, we have used a pseudo-typed lentiviral reporter vector to study the effect of  
587 IFN and NF $\kappa$ B signaling and specific inhibitors on viral entry in primary alveolar epithelial cells.

### 588 **Reagents**

589 A list of reagents, including antibodies, probes, cell lines, chemical reagents and software, can  
590 be found in the Resources table (Supplementary Table 1).

### 591 **Single cell RNA sequencing datasets**

592  
593 Three publicly available scRNA-seq datasets were obtained as follows: 1) processed data  
594 including count and metadata tables of healthy lung tissue was downloaded from Figshare  
595 (<https://doi.org/10.6084/m9.figshare.11981034.v1>); 2) h5 files of normal lungs were extracted  
596 from the Gene Expression Omnibus (GEO) database (<https://www.ncbi.nlm.nih.gov/geo/>) under  
597 accession number GSE122960; and 3) processed data including count and metadata tables of  
598 human lung tissue was acquired from GSE130148. All three datasets were generated on  
599 Illumina HiSeq 4000. Characteristics of all the samples containing sample name, sex, age and  
600 smoking status are provided in Supplementary Table 2.

### 601 **Single cell RNA sequencing data analysis**

602  
603 Count matrix was used to create a Seurat object for each dataset, and the three Seurat objects  
604 were further merged into a new Seurat object with the resulting combined count matrix. The  
605 merged matrix was first normalized using a global-scaling normalization method “LogNormalize”  
606 in Seurat v.3.2.0 with default parameters. To detect the most variable genes used for principal  
607 component analysis (PCA), variable gene selection was performed and the top 2,000 variable  
608 genes were then selected using the ‘vst’ selection method in Seurat FindVariableFeatures  
609 function. All genes were scaled in the scaling step and PCA was performed using the selected  
610 top 2,000 informative genes. To do batch effect correction, Harmony algorithm was run on the  
611 top 50 PCA embeddings using RunHarmony function. Then UMAP calculation was performed  
612 on the top 30 Harmony embeddings for visualizing the cells. Meanwhile, graph-based clustering  
613 was done on the harmony-reduced data. The final resolution was set to 0.2 to obtain a better  
614 clustering result.

### 615 **Generation of histone modification enrichment profiles and transcription factor binding motif analysis**

616  
617 H3K27ac and H3K4me3 binding profiles were constructed using publicly available ENCODE  
618 datasets. Accession numbers for all ENCODE datasets used can be found in Encode Data Sets  
619 Table (Supplementary Table 3). The data were visualized with UCSC genome browser (83, 84).  
620 Predicted enhancer regions of TMPRSS2 were identified using the GeneHancer tool within  
621  
622

623 Track Data Hubs of UCSC genome browser (85, 86). Promoter and enhancer associated  
624 transcription factors were predicted by JASPAR (87).

625

### 626 **Gene set enrichment analysis**

627 Gene set enrichment analyses (GSEA) were performed according to the instructions. Gene sets  
628 of Hallmark Collection, Canonical Pathway (including KEGG Pathway, Biocarta Pathway,  
629 Reactome Pathway and PID Pathway), and GO Biological Process were used. All transcription  
630 factor targets are from the Molecular Signatures Database (MSigDB) version 7.1. The interferon  
631 signatures were searched from MSigDB with the Keyword: interferon and the Search Filters: "H:  
632 hallmark gene sets; --CP: canonical pathways; --GO: Gene Ontology".

633

### 634 **Cell lines and cell culture**

635 All cells were incubated at 37°C and 5% CO<sub>2</sub>. AEpiC cells were obtained from Cell Biologics  
636 (#H-6053), and Calu-3 cells were obtained from ATCC (#). AEpiC cells were incubated with  
637 Alveolar Epithelial Cell Medium (ScienCell, #3201) supplemented with 2% fetal bovine serum,  
638 penicillin, streptomycin, and epithelial growth supplement. Calu-3 cells were incubated with  
639 Dulbecco's Modified Eagle Medium supplemented with 10% fetal bovine serum, penicillin, and  
640 streptomycin.

641

### 642 **Western blotting**

643 For immunoblotting, cells were washed once with PBS and lysed in either RIPA buffer with  
644 protease inhibitor or Laemmli sample buffer with BME. Samples were quantified with Pierce BCA  
645 Protein Assay Kit (Thermo Scientific, #23225) where applicable, and boiled for 5 minutes before  
646 gel loading. Lysates were run on 4-15% precast electrophoresis gels, and transferred to PVDF  
647 membranes. Membranes were blocked for 1 hour with 5% BSA, and incubated overnight with  
648 primary antibodies (5% BSA) in 4 degrees, with Rho-GDI as the endogenous control.  
649 Membranes were washed 3Xs with TBST, incubated for 2 hours at room temperature with the  
650 appropriate secondary antibody (5% BSA or milk), and visualized using ECL.

651

### 652 **Quantitative PCR (qPCR)**

653 For qPCR analysis, cells were harvested and RNA was extracted using the Maxwell RSC  
654 simplyRNA Cells kit (Promega #AS1390). cDNA synthesis was conducted with the qScript cDNA  
655 SuperMix (Quantabio #95048). qPCR was achieved using TaqMan probes to the appropriate  
656 protein of interest, with 18S as the endogenous control.

657

### 658 **Chromatin Immunoprecipitation (ChIP)**

659 1x10<sup>6</sup> cells were crosslinked with 2mM DSG for 45 minutes, then with 1% formaldehyde for 25  
660 minutes, both performed at room temperature (RT). To stop the crosslinking, glycine was added  
661 to a final concentration of 0.125M, then incubated at RT for 5 min. Cells were collected by  
662 scraping from the dishes, then washed with PBS three times. Pellets were resuspended in 0.5ml  
663 of SDS lysis buffer (1% SDS, 10mM EDTA, 50mM Tris-HCl, pH8.0)/PIC/PMSF/Sodium butyrate  
664 mix, then incubated on ice for 10 minutes. The crosslinked cellular lysates were then sonicated  
665 with a Diagnode sonicator. After sonication, samples were aliquoted into a 1.7ml tube. Tubes  
666 were centrifuged at max speed for 10 minutes at 4°C. Supernatant was then transferred to a  
667 new 1.7ml tube. To prepare chromatin immunoprecipitation sample, per 0.1ml of sonicated  
668 sample, 0.9ml of dilution buffer (50mM Tris-HCl, pH8.0, 0.167M NaCl, 1.1% Triton X-100, 0.11%  
669 sodium deoxycholate)/PIC/PMSF/Sodium butyrate mix was added, followed by antibody bound  
670 Dynabeads. The tubes were gently mixed and placed on a rocker at 4°C. The tubes were then



671 placed in magnetic stand, inverted several times, and beads were allowed to clump. The  
672 supernatant was then discarded. Beads were flicked to resuspend and were then washed with  
673 1X RIPA-150, 1X RIPA-500, 1X RIPA-LiCl, and 2X TE buffer (pH 8.0), for 5 minutes each on a  
674 rocker at 4°C. After each wash, the tubes were again placed on a magnetic stand and  
675 supernatant was discarded after the beads clumped. Beads were then resuspended in 200µl of  
676 Direct Elution Buffer (10mM Tris-HCl pH8.0, 0.3M NaCl, 5mM EDTA, 0.5% SDS). 1µl of RNaseA  
677 was added and incubated at 65°C to reverse crosslink. The tubes were quickly centrifuged, place  
678 on a magnetic stand, and supernatant was transferred to a new low-bind tube after beads  
679 clumped. 3µl of Proteinase K was added and incubated for 2hrs at 55°C. The sample was  
680 purified using phase lock tubes and ethanol precipitation. Samples were resuspended in 25µl of  
681 Qiagen elution buffer. DNA was amplified by real-time PCR (ABI Power SYBR Green PCR mix).

682

### 683 **Co-immunoprecipitation (co-IP)**

684 Calu3 cells were incubated with either IFN-α and IFN-β, or IFN-λ for 3 hours. After IFN  
685 stimulation, cells were lysed in 1 ml of ice-cold non-denaturing lysis buffer (20 mM, Tris-HCl pH8,  
686 137 mM NaCl, 10% glycerol, 1% Nonidet P-40, and 2 mM EDTA) supplemented with a protease  
687 inhibitor cocktail (Thermo Scientific, 78429). Whole cell extracts were incubated with either  
688 STAT1, STAT2, or control rabbit IgG antibody and protein G beads (Invitrogen, 10003D)  
689 overnight at 4 °C while rotating. Beads were washed 3 times with ice cold nondenaturing lysis  
690 buffer and boiled in 4x Laemmli Sample Buffer (Bio-Rad, #1610747) for 10 mins. For  
691 immunoblotting, samples were separated by SDS-PAGE and then transferred to PVDF  
692 membranes. Afterward, membranes were probed with antibodies against STAT1, STAT2, IRF9,  
693 and rabbit IgG.

694

### 695 **Immunofluorescence**

696 Cells were plated onto round coverslips. Cells were then fixed in 4% paraformaldehyde for  
697 15 minutes and blocked by 5% BSA for 1 hour. The cells were then incubated with primary  
698 antibodies overnight, followed by incubation with the fluorochrome-conjugated secondary anti-  
699 mouse or anti-rabbit IgG (H+L) for 1 hour at 37 °C. After staining, the slides were counterstained  
700 with DAPI (Sigma Aldrich, cat# D9542, 5 µg/ml) for 10 minutes and cover slipped with Mowiol.

701

### 702 **Pseudovirus SARS-Cov-2 infection**

703 Lentivirus pseudotyped with SARS-CoV-2 Spike Protein was supplied by VectorBuilder (Catalog  
704 #: LVM-SARS-CoV-2\_S(VB160426-1050cgb)-C) with Luciferase as a reporter. Following pre-  
705 exposures without and with either drugs or cytokines, AEpC and Calu-3 cells were infected  
706 with psuedotyped SARS-CoV-2 at a multiplicity of infection of 0.1 in triplicate. Transduction  
707 efficiency of the virus was quantified 48 hours post transduction by measuring the activity of  
708 firefly luciferase in cell lysates. Luciferase signal was measured according to Dual-Glo®  
709 Luciferase Assay System - Promega Corporation.

710

### 711 **Gene transfer and RNA interference**

712 shRNA expression in mammalian cells was achieved by means of lentiviral vectors.  
713 Lipofectamine 3000 was used to co-transfect transfer plasmids and packaging vectors in 293T  
714 cells. Calu-3 cells were transduced by incubation with lentiviral vector suspensions, in the  
715 presence of 8 µg/ml polybrene, for 8–12 hours. In other experiments, cDNA and small interfering  
716 RNA-expressing constructs were transiently transfected with Lipofectamine 2000 (Life  
717 Technologies) according to manufacturer's instructions.

718

719 **Statistics**

720 Statistical analysis used R and GraphPad Prism 8 software. At least three biologically  
721 independent samples were used to determine significance. Results are reported as mean  $\pm$  SD.  
722 Non-parametric two-sided Wilcoxon rank sum tests were used to identify differentially expressed  
723 genes in all the comparisons discussed in scRNA-seq analysis. Comparisons between two  
724 groups were performed using an unpaired two-sided Student's t test ( $p < 0.05$  was considered  
725 significant). Comparison of multiple conditions was done with One-way or two-way ANOVA test.  
726 The Fisher's exact test was used to compare the ratio of double positive cells between groups.  
727 Only p values of 0.05 or lower were considered statistically significant ( $p > 0.05$  [ns, not  
728 significant],  $p \leq 0.05$  [\*],  $p \leq 0.01$  [\*\*],  $p \leq 0.001$  [\*\*\*],  $p \leq 0.0001$  [\*\*\*\*]).

729

730

731

732

733

734

735

736

737

738

739

740

741

742

743

744

745

746

747

748

749

750

751

752

753

754

755 **Author Contributions:** F.G.G. conceived and led the study. F.G.G., Y.W. conceived the  
756 hypotheses and designed and analyzed the experiments. Y.W., S.G., H.C., S.L., E.C., Y.J.,  
757 H.H.L., and F.G.G. wrote the manuscript. Y.W., S.G., H.C., S.L., E.C., Y.J., H.H.L. performed  
758 and analyzed experiments.

759 **Acknowledgements:** This work was supported by NIH grants R35 CA197566 (Outstanding  
760 Investigator Award to F.G.G.), and by CPRIT Recruitment of Established Investigators Award  
761 RR160031 (to F.G.G.). We thank members of the Giancotti laboratory for discussions.

762 **Competing interests:** The authors have declared that no conflict of interest exists.

763 **Data and materials availability:** All data needed to evaluate the conclusions in the paper are  
764 present in the paper or the Supplementary Materials.

765

766

767

768

769

770

771

772

773

774

775

776

777

778

779

780

781

782

783

784

785

786

787

## 788 References

- 789 1. Wu JT, Leung K, Bushman M, Kishore N, Niehus R, de Salazar PM, et al. Estimating clinical  
790 severity of COVID-19 from the transmission dynamics in Wuhan, China. *Nat Med*.  
791 2020;26(4):506-10.
- 792 2. Nicola M, Alsaifi Z, Sohrabi C, Kerwan A, Al-Jabir A, Iosifidis C, et al. The socio-economic  
793 implications of the coronavirus pandemic (COVID-19): A review. *Int J Surg*. 2020;78:185-93.
- 794 3. Le TT, Cramer JP, Chen R, and Mayhew S. Evolution of the COVID-19 vaccine development  
795 landscape. *Nat Rev Drug Discov*. 2020;19(10):667-8.
- 796 4. Khamsi R. If a coronavirus vaccine arrives, can the world make enough? . *Nature*.  
797 2020;580(7805):578-80.
- 798 5. Haynes BF, Corey L, Fernandes P, Gilbert PB, Hotez PJ, Rao S, et al. Prospects for a safe COVID-  
799 19 vaccine. *Sci Transl Med*. 2020;12(568).
- 800 6. Lan J, Ge J, Yu J, Shan S, Zhou H, Fan S, et al. Structure of the SARS-CoV-2 spike receptor-binding  
801 domain bound to the ACE2 receptor. *Nature*. 2020;581(7807):215-20.
- 802 7. Guan WJ, Ni ZY, Hu Y, Liang WH, Ou CQ, He JX, et al. Clinical Characteristics of Coronavirus  
803 Disease 2019 in China. *N Engl J Med*. 2020;382(18):1708-20.
- 804 8. Gupta A, Madhavan MV, Sehgal K, Nair N, Mahajan S, Sehrawat TS, et al. Extrapulmonary  
805 manifestations of COVID-19. *Nat Med*. 2020;26(7):1017-32.
- 806 9. Hoffmann M, Kleine-Weber H, Schroeder S, Kruger N, Herrler T, Erichsen S, et al. SARS-CoV-2  
807 Cell Entry Depends on ACE2 and TMPRSS2 and Is Blocked by a Clinically Proven Protease  
808 Inhibitor. *Cell*. 2020;181(2):271-80 e8.
- 809 10. Ghosh S, Dellibovi-Ragheb TA, Kerviel A, Pak, E., Qiu, Q., and Fisher M, Takvorian, P. M., Bleck,  
810 C., Hsu, V. W., Fehr, A. R., Perlman, S., Achar, S. R., Straus, M. R., Whittaker, G. R., de Haan, C.,  
811 Kehrl, J., Altan-Bonnet, G., & Altan-Bonnet, N.  $\beta$ -Coronaviruses Use Lysosomes for Egress  
812 Instead of the Biosynthetic Secretory Pathway. *Cell*. 2020;183(6):1520-35.
- 813 11. Hou YJ, Okuda K, Edwards CE, Martinez DR, Asakura T, Dinnon KH, 3rd, et al. SARS-CoV-2  
814 Reverse Genetics Reveals a Variable Infection Gradient in the Respiratory Tract. *Cell*.  
815 2020;182(2):429-46 e14.
- 816 12. Sungnak W, Huang N, Becavin C, Berg M, Queen R, Litvinukova M, et al. SARS-CoV-2 entry  
817 factors are highly expressed in nasal epithelial cells together with innate immune genes. *Nat*  
818 *Med*. 2020;26(5):681-7.
- 819 13. Smith JC, Sausville EL, Girish V, Yuan ML, Vasudevan A, John KM, et al. Cigarette Smoke  
820 Exposure and Inflammatory Signaling Increase the Expression of the SARS-CoV-2 Receptor ACE2  
821 in the Respiratory Tract. *Dev Cell*. 2020;53(5):514-29 e3.
- 822 14. Lukassen S, Chua RL, Trefzer T, Kahn NC, Schneider MA, Muley T, et al. SARS-CoV-2 receptor  
823 ACE2 and TMPRSS2 are primarily expressed in bronchial transient secretory cells. *EMBO J*.  
824 2020;39(10):e105114.
- 825 15. Ziegler CGK, Allon SJ, Nyquist SK, Mbanjo IM, Miao VN, Tzouanas CN, et al. SARS-CoV-2 Receptor  
826 ACE2 Is an Interferon-Stimulated Gene in Human Airway Epithelial Cells and Is Detected in  
827 Specific Cell Subsets across Tissues. *Cell*. 2020;181(5):1016-35 e19.
- 828 16. Katsura H, Sontake V, Tata A, Kobayashi Y, Edwards CE, Heaton BE, et al. Human Lung Stem Cell-  
829 Based Alveolospheres Provide Insights into SARS-CoV-2-Mediated Interferon Responses and  
830 Pneumocyte Dysfunction. *Cell Stem Cell*. 2020;27(6):890-904 e8.

- 831 17. Ng KW, Attig J, Bolland W, Young GR, Major J, Wrobel AG, et al. Tissue-specific and interferon-  
832 inducible expression of nonfunctional ACE2 through endogenous retroelement co-option. *Nat*  
833 *Genet.* 2020;52(12):1294-302.
- 834 18. Onabajo OO, Banday AR, Stanifer ML, Yan W, Obajemu A, Santer DM, et al. Interferons and  
835 viruses induce a novel truncated ACE2 isoform and not the full-length SARS-CoV-2 receptor. *Nat*  
836 *Genet.* 2020;52(12):1283-93.
- 837 19. Stopsack KH, Mucci LA, Antonarakis ES, Nelson PS, and Kantoff PW. TMPRSS2 and COVID-19:  
838 Serendipity or Opportunity for Intervention? *Cancer Discov.* 2020;10(6):779-82.
- 839 20. Tomlins SA, Rhodes DR, Perner S, Dhanasekaran SM, Mehra R, Sun XW, et al. Recurrent fusion  
840 of TMPRSS2 and ETS transcription factor genes in prostate cancer. *Science.*  
841 2005;310(5748):644-8.
- 842 21. Samuel RM, Majd H, Richter MN, Ghazizadeh Z, Zekavat SM, Navickas A, et al. Androgen  
843 Signaling Regulates SARS-CoV-2 Receptor Levels and Is Associated with Severe COVID-19  
844 Symptoms in Men. *Cell Stem Cell.* 2020;27(6):876-89 e12.
- 845 22. Montopoli M, Zumerle S, Vettor R, Rugge M, Zorzi M, Catapano CV, et al. Androgen-deprivation  
846 therapies for prostate cancer and risk of infection by SARS-CoV-2: a population-based study (N  
847 = 4532). *Ann Oncol.* 2020;31(8):1040-5.
- 848 23. Gebhard C, Regitz-Zagrosek V, Neuhauser HK, Morgan R, and Klein SL. Impact of sex and gender  
849 on COVID-19 outcomes in Europe. *Biol Sex Differ.* 2020;11(1):29.
- 850 24. Williamson EJ, Walker AJ, Bhaskaran K, Bacon S, Bates C, Morton CE, et al. Factors associated  
851 with COVID-19-related death using OpenSAFELY. *Nature.* 2020;584(7821):430-6.
- 852 25. Zhou R, To KK, Wong YC, Liu L, Zhou B, Li X, et al. Acute SARS-CoV-2 Infection Impairs Dendritic  
853 Cell and T Cell Responses. *Immunity.* 2020;53(4):864-77 e5.
- 854 26. Kaneko N, Kuo HH, Boucau J, Farmer JR, Allard-Chamard H, Mahajan VS, et al. Loss of Bcl-6-  
855 Expressing T Follicular Helper Cells and Germinal Centers in COVID-19. *Cell.* 2020;183(1):143-57  
856 e13.
- 857 27. Liao M, Liu Y, Yuan J, Wen Y, Xu G, Zhao J, et al. Single-cell landscape of bronchoalveolar  
858 immune cells in patients with COVID-19. *Nat Med.* 2020;26(6):842-4.
- 859 28. Lee JS, Park S, Jeong HW, Ahn JY, Choi SJ, Lee H, et al. Immunophenotyping of COVID-19 and  
860 influenza highlights the role of type I interferons in development of severe COVID-19. *Sci*  
861 *Immunol.* 2020;5(49).
- 862 29. Chua RL, Lukassen S, Trump S, Hennig BP, Wendisch D, Pott F, et al. COVID-19 severity  
863 correlates with airway epithelium-immune cell interactions identified by single-cell analysis. *Nat*  
864 *Biotechnol.* 2020;38(8):970-9.
- 865 30. Takahashi T, Ellingson MK, Wong P, Israelow B, Lucas C, Klein J, et al. Sex differences in immune  
866 responses that underlie COVID-19 disease outcomes. *Nature.* 2020;588(7837):315-20.
- 867 31. Flanagan KL, Fink AL, Plebanski M, and Klein SL. Sex and Gender Differences in the Outcomes of  
868 Vaccination over the Life Course. *Annu Rev Cell Dev Biol.* 2017;33:577-99.
- 869 32. Klein SL, and Flanagan KL. Sex differences in immune responses. *Nat Rev Immunol.*  
870 2016;16(10):626-38.
- 871 33. Bunders MJ, and Altfeld M. Implications of Sex Differences in Immunity for SARS-CoV-2  
872 Pathogenesis and Design of Therapeutic Interventions. *Immunity.* 2020;53(3):487-95.
- 873 34. Vieira Braga FA, Kar G, Berg M, Carpaij OA, Polanski K, Simon LM, et al. A cellular census of  
874 human lungs identifies novel cell states in health and in asthma. *Nat Med.* 2019;25(7):1153-63.

- 875 35. Reyfman PA, Walter JM, Joshi N, Anekalla KR, McQuattie-Pimentel AC, Chiu S, et al. Single-Cell  
876 Transcriptomic Analysis of Human Lung Provides Insights into the Pathobiology of Pulmonary  
877 Fibrosis. *Am J Respir Crit Care Med*. 2019;199(12):1517-36.
- 878 36. Korsunsky I, Millard N, Fan J, Slowikowski K, Zhang F, Wei K, et al. Fast, sensitive and accurate  
879 integration of single-cell data with Harmony. *Nat Methods*. 2019;16(12):1289-96.
- 880 37. Muus C, Luecken MD, Eraslan G, Sikkema L, Waghay A, Heimberg G, et al. Single-cell meta-  
881 analysis of SARS-CoV-2 entry genes across tissues and demographics. *Nat Med*. 2021;27(3):546-  
882 59.
- 883 38. Smillie CS, Biton M, Ordovas-Montanes J, Sullivan KM, Burgin G, Graham DB, et al. Intra- and  
884 Inter-cellular Rewiring of the Human Colon during Ulcerative Colitis. *Cell*. 2019;178(3):714-30  
885 e22.
- 886 39. Muus C, Luecken MD, Eraslan G, Waghay A, Heimberg G, Sikkema L, et al. Integrated analyses  
887 of single-cell atlases reveal age, gender, and smoking status associations with cell type-specific  
888 expression of mediators of SARS-CoV-2 viral entry and highlights inflammatory programs in  
889 putative target cells. *bioRxiv*. 2020:2020.04.19.049254.
- 890 40. Madisson E, Wilbrey-Clark A, Miragaia RJ, Saeb-Parsy K, Mahbubani KT, Georgakopoulos N, et  
891 al. scRNA-seq assessment of the human lung, spleen, and esophagus tissue stability after cold  
892 preservation. *Genome Biol*. 2019;21(1):1.
- 893 41. Zhang P, Yang M, Zhang Y, Xiao S, Lai X, Tan A, et al. Dissecting the Single-Cell Transcriptome  
894 Network Underlying Gastric Premalignant Lesions and Early Gastric Cancer. *Cell Rep*.  
895 2019;27(6):1934-47 e5.
- 896 42. Ren X, Wen W, Fan X, Hou W, Su B, Cai P, et al. COVID-19 immune features revealed by a large-  
897 scale single-cell transcriptome atlas. *Cell*. 2021;184(7):1895-913 e19.
- 898 43. Ravindra NG, Alfajaro MM, Gasque V, Wei J, Filler RB, Huston NC, et al. Single-cell longitudinal  
899 analysis of SARS-CoV-2 infection in human bronchial epithelial cells. *bioRxiv*. 2020.
- 900 44. Yeung ML, Teng JLL, Jia L, Zhang C, Huang C, Cai JP, et al. Soluble ACE2-mediated cell entry of  
901 SARS-CoV-2 via interaction with proteins related to the renin-angiotensin system. *Cell*.  
902 2021;184(8):2212-28 e12.
- 903 45. Liu J, Ji H, Zheng W, Wu X, Zhu JJ, Arnold AP, et al. Sex differences in renal angiotensin  
904 converting enzyme 2 (ACE2) activity are 17beta-oestradiol-dependent and sex chromosome-  
905 independent. *Biol Sex Differ*. 2010;1(1):6.
- 906 46. Tukiainen T, Villani AC, Yen A, Rivas MA, Marshall JL, Satija R, et al. Landscape of X chromosome  
907 inactivation across human tissues. *Nature*. 2017;550(7675):244-8.
- 908 47. Darnell JE, Jr., Kerr IM, and Stark GR. Jak-STAT pathways and transcriptional activation in  
909 response to IFNs and other extracellular signaling proteins. *Science*. 1994;264(5164):1415-21.
- 910 48. Au-Yeung N, Mandhana R, and Horvath CM. Transcriptional regulation by STAT1 and STAT2 in  
911 the interferon JAK-STAT pathway. *JAKSTAT*. 2013;2(3):e23931.
- 912 49. Clark JD, Flanagan ME, and Telliez JB. Discovery and development of Janus kinase (JAK)  
913 inhibitors for inflammatory diseases. *J Med Chem*. 2014;57(12):5023-38.
- 914 50. Crapo JD, Young SL, Fram EK, Pinkerton KE, Barry BE, and Crapo RO. Morphometric  
915 characteristics of cells in the alveolar region of mammalian lungs. *Am Rev Respir Dis*.  
916 1983;128(2 Pt 2):S42-6.
- 917 51. Mesev EV, LeDesma RA, and Ploss A. Decoding type I and III interferon signalling during viral  
918 infection. *Nat Microbiol*. 2019;4(6):914-24.



- 919 52. Goubau D, Deddouche S, and Reis e Sousa C. Cytosolic sensing of viruses. *Immunity*.  
920 2013;38(5):855-69.
- 921 53. Uematsu S, and Akira S. Toll-like receptors and Type I interferons. *J Biol Chem*.  
922 2007;282(21):15319-23.
- 923 54. Motwani M, Pesiridis S, and Fitzgerald KA. DNA sensing by the cGAS-STING pathway in health  
924 and disease. *Nat Rev Genet*. 2019;20(11):657-74.
- 925 55. Pierce JW, Schoenleber R, Jesmok G, Best J, Moore SA, Collins T, et al. Novel inhibitors of  
926 cytokine-induced I $\kappa$ B phosphorylation and endothelial cell adhesion molecule  
927 expression show anti-inflammatory effects in vivo. *J Biol Chem*. 1997;272(34):21096-103.
- 928 56. Karki R, Sharma BR, Tuladhar S, Williams EP, Zalduondo L, Samir P, et al. Synergism of TNF-alpha  
929 and IFN-gamma Triggers Inflammatory Cell Death, Tissue Damage, and Mortality in SARS-CoV-2  
930 Infection and Cytokine Shock Syndromes. *Cell*. 2021;184(1):149-68 e17.
- 931 57. Su Y, Chen D, Yuan D, Lausted C, Choi J, Dai CL, et al. Multi-Omics Resolves a Sharp Disease-  
932 State Shift between Mild and Moderate COVID-19. *Cell*. 2020;183(6):1479-95 e20.
- 933 58. Szabo PA, Dogra P, Gray JI, Wells SB, Connors TJ, Weisberg SP, et al. Analysis of respiratory and  
934 systemic immune responses in COVID-19 reveals mechanisms of disease pathogenesis.  
935 *medRxiv*. 2020.
- 936 59. Liu J, Li S, Liu J, Liang B, Wang X, Wang H, et al. Longitudinal characteristics of lymphocyte  
937 responses and cytokine profiles in the peripheral blood of SARS-CoV-2 infected patients.  
938 *EBioMedicine*. 2020;55:102763.
- 939 60. Chen G, and Goeddel DV. TNF-R1 signaling: a beautiful pathway. *Science*. 2002;296(5573):1634-  
940 5.
- 941 61. Czerkies M, Korwek Z, Prus W, Kochanczyk M, Jaruszewicz-Blonska J, Tudelska K, et al. Cell fate  
942 in antiviral response arises in the crosstalk of IRF, NF-kappaB and JAK/STAT pathways. *Nat*  
943 *Commun*. 2018;9(1):493.
- 944 62. Hammad H, and Lambrecht BN. Barrier Epithelial Cells and the Control of Type 2 Immunity.  
945 *Immunity*. 2015;43(1):29-40.
- 946 63. Stetson DB, and Medzhitov R. Type I interferons in host defense. *Immunity*. 2006;25(3):373-81.
- 947 64. Mangalmurti N, and Hunter CA. Cytokine Storms: Understanding COVID-19. *Immunity*.  
948 2020;53(1):19-25.
- 949 65. Salahudeen AA, Choi SS, Rustagi A, Zhu J, van Unen V, de la OS, et al. Progenitor identification  
950 and SARS-CoV-2 infection in human distal lung organoids. *Nature*. 2020;588(7839):670-5.
- 951 66. Youk J, Kim T, Evans KV, Jeong YI, Hur Y, Hong SP, et al. Three-Dimensional Human Alveolar  
952 Stem Cell Culture Models Reveal Infection Response to SARS-CoV-2. *Cell Stem Cell*.  
953 2020;27(6):905-19 e10.
- 954 67. Qiao Y, Wang XM, Mannan R, Pitchiaya S, Zhang Y, Wotring JW, et al. Targeting transcriptional  
955 regulation of SARS-CoV-2 entry factors ACE2 and TMPRSS2. *Proc Natl Acad Sci U S A*. 2020.
- 956 68. Kalil AC, Patterson TF, Mehta AK, Tomashek KM, Wolfe CR, Ghazaryan V, et al. Baricitinib plus  
957 Remdesivir for Hospitalized Adults with Covid-19. *N Engl J Med*. 2021;384(9):795-807.
- 958 69. Stebbing J, Sanchez Nieves G, Falcone M, Youhanna S, Richardson P, Ottaviani S, et al. JAK  
959 inhibition reduces SARS-CoV-2 liver infectivity and modulates inflammatory responses to  
960 reduce morbidity and mortality. *Sci Adv*. 2021;7(1).
- 961 70. Brenner D, Blaser H, and Mak TW. Regulation of tumour necrosis factor signalling: live or let die.  
962 *Nat Rev Immunol*. 2015;15(6):362-74.



- 963 71. Villarino AV, Kanno Y, and O'Shea JJ. Mechanisms and consequences of Jak-STAT signaling in the  
964 immune system. *Nat Immunol.* 2017;18(4):374-84.
- 965 72. Kopp E, and Ghosh S. Inhibition of NF-kappa B by sodium salicylate and aspirin. *Science.*  
966 1994;265(5174):956-9.
- 967 73. Blanco-Melo D, Nilsson-Payant BE, Liu WC, Uhl S, Hoagland D, Moller R, et al. Imbalanced Host  
968 Response to SARS-CoV-2 Drives Development of COVID-19. *Cell.* 2020;181(5):1036-45 e9.
- 969 74. Lokugamage KG, Hage A, de Vries M, Valero-Jimenez AM, Schindewolf C, Dittmann M, et al.  
970 Type I Interferon Susceptibility Distinguishes SARS-CoV-2 from SARS-CoV. *J Virol.* 2020;94(23).
- 971 75. Miorin L, Kehrer T, Sanchez-Aparicio MT, Zhang K, Cohen P, Patel RS, et al. SARS-CoV-2 Orf6  
972 hijacks Nup98 to block STAT nuclear import and antagonize interferon signaling. *Proc Natl Acad  
973 Sci U S A.* 2020;117(45):28344-54.
- 974 76. Ou X, Liu Y, Lei X, Li P, Mi D, Ren L, et al. Characterization of spike glycoprotein of SARS-CoV-2  
975 on virus entry and its immune cross-reactivity with SARS-CoV. *Nat Commun.* 2020;11(1):1620.
- 976 77. Shin D, Mukherjee R, Grewe D, Bojkova D, Baek K, Bhattacharya A, et al. Papain-like protease  
977 regulates SARS-CoV-2 viral spread and innate immunity. *Nature.* 2020;587(7835):657-62.
- 978 78. Xia H, Cao Z, Xie X, Zhang X, Chen JY, Wang H, et al. Evasion of Type I Interferon by SARS-CoV-2.  
979 *Cell Rep.* 2020;33(1):108234.
- 980 79. Zhang X, Liu Y, Liu J, Bailey AL, Plante KS, Plante JA, et al. A trans-complementation system for  
981 SARS-CoV-2 recapitulates authentic viral replication without virulence. *Cell.* 2021;184(8):2229-  
982 38 e13.
- 983 80. Bastard P, Rosen LB, Zhang Q, Michailidis E, Hoffmann HH, Zhang Y, et al. Autoantibodies  
984 against type I IFNs in patients with life-threatening COVID-19. *Science.* 2020;370(6515).
- 985 81. Zhang Q, Bastard P, Liu Z, Le Pen J, Moncada-Velez M, Chen J, et al. Inborn errors of type I IFN  
986 immunity in patients with life-threatening COVID-19. *Science.* 2020;370(6515).
- 987 82. Major J, Crotta S, Llorian M, McCabe TM, Gad HH, Priestnall SL, et al. Type I and III interferons  
988 disrupt lung epithelial repair during recovery from viral infection. *Science.* 2020;369(6504):712-  
989 7.
- 990 83. Davis CA, Hitz BC, Sloan CA, Chan ET, Davidson JM, Gabdank I, et al. The Encyclopedia of DNA  
991 elements (ENCODE): data portal update. *Nucleic Acids Res.* 2018;46(D1):D794-D801.
- 992 84. Kent WJ, Sugnet CW, Furey TS, Roskin KM, Pringle TH, Zahler AM, et al. The human genome  
993 browser at UCSC. *Genome Res.* 2002;12(6):996-1006.
- 994 85. Fishilevich S, Nudel R, Rappaport N, Hadar R, Plaschkes I, Iny Stein T, et al. GeneHancer:  
995 genome-wide integration of enhancers and target genes in GeneCards. *Database (Oxford).*  
996 2017;2017.
- 997 86. Raney BJ, Dreszer TR, Barber GP, Clawson H, Fujita PA, Wang T, et al. Track data hubs enable  
998 visualization of user-defined genome-wide annotations on the UCSC Genome Browser.  
999 *Bioinformatics.* 2014;30(7):1003-5.
- .000 87. Fornes O, Castro-Mondragon JA, Khan A, van der Lee R, Zhang X, Richmond PA, et al. JASPAR  
.001 2020: update of the open-access database of transcription factor binding profiles. *Nucleic Acids  
.002 Res.* 2020;48(D1):D87-D92.
- .003  
.004  
.005  
.006

.007 **Figure legends**

.008 **Figure 1. Gene expression of ACE2 and TMPRSS2 occurs largely in AT1 and AT2 epithelial**  
.009 **cells.**

.010 (A) Schematic demonstrating the integration of multiple single cell RNA sequencing datasets  
.011 from healthy human lung samples (n = 24).

.012 (B) Stacked bar plot showing the fraction of each sample represented in each cluster. X-axis is  
.013 the cluster (#0-13), and y-axis is the fraction of each sample that makes up each cluster.

.014 (C) UMAP visualization of 93,770 human lung cells colored by cell type and annotated on the  
.015 basis of marker genes.

.016 (D) Expression of selected canonical cell markers by cell type. The size of the dot correlates to  
.017 the percentage of cells within a cell type in which that marker was detected. The color shows the  
.018 average expression level. AT1 = alveolar type I; AT2 = alveolar type II.

.019 (E-G) UMAP projection with cells colored by detection of *ACE2* (E), *TMPRSS2* (F) or  
.020 *ACE2+TMPRSS2+* (G). The percentages of AT1 and of AT2 cells expressing *ACE2*, *TMPRSS2*  
.021 or *ACE2/TMPRSS2*, respectively, are also given.

.022

.023 **Figure 2. The expression level of ACE2 and TMPRSS2 is sex-related.**

.024 (A and B) Expression of *ACE2* (A) and *TMPRSS2* (B) in males and females, respectively, by cell  
.025 type. The size of the dot correlates to the percentage of cells within a cell type in which  
.026 *ACE2/TMPRSS2* was detected. The color encodes the average expression level.

.027 (C and D) Normalized expression of *ACE2* (C) and *TMPRSS2* (D) in males (red) and females  
.028 (blue) in AT1 and AT2 cells. Asterisks indicate significant adjusted p-value of comparison  
.029 between males and females. \*\*\* p.adj < 0.001.

.030 (E) The ratio of *ACE2+TMPRSS2+* double positive cells in AT1 (left) and AT2 (right) cells in  
.031 males (red) and females (blue). \* p < 0.05; \*\*\* p < 0.001.

.032

.033 **Figure 3. Lung-specific enhancers of TMPRSS2 are enriched in binding sites targeted by**  
.034 **interferon transcription factors.**

.035

.036 (A) UCSC genome browser (<http://genome.ucsc.edu>) view of the *TMPRSS2* gene, with aligned  
.037 transcription factors according to the binding motif from JASPAR (<http://jaspar.genereg.net>), and  
.038 the regulatory elements and gene interactions from GeneHancer ([https://genome.ucsc.edu/cgi-  
.039 bin/hgTrackUi?db=hg19&g=geneHancer](https://genome.ucsc.edu/cgi-bin/hgTrackUi?db=hg19&g=geneHancer)).

.040 (B) UCSC genome browser (<http://genome.ucsc.edu>) view of the *ACE2* gene, with aligned  
.041 transcription factors according to the binding motif from JASPAR, and the regulatory elements  
.042 and gene interactions from GeneHancer.

.043 (C) Male-specific enriched gene sets in “all transcription factor targets” from MSigDB database  
.044 (<http://www.gsea-msigdb.org/gsea/msigdb/index.jsp>) for AT1 cells. The y-axis represents the  
.045 value of log<sub>10</sub>-converted adjusted p-value. The x-axis displays the transcription factors  
.046 corresponding to the gene sets.

.047 (D) Male-specific enriched gene sets in “all transcription factor targets” from MSigDB database  
.048 for AT2 cells. The y-axis represents the value of log<sub>10</sub>-converted adjusted p-value. The x-axis  
.049 displays the transcription factors corresponding to the gene sets.

.050 (E) Motifs of transcription factors involved in interferon signaling enriched in male AT1/AT2 cells.  
.051 The motif logos are downloaded from JASPAR 2020 website.

.052 (F) Genomic location and sequence of the representative transcription factor binding sites in the  
.053 promoter and enhancer regions of *ACE2*.

.054  
.055 (G) Genomic location and sequence of the representative transcription factor binding sites in the  
.056 promoter and enhancer regions of *TMPRSS2*.

.057

.058

.059 **Figure 4. The activity of interferon signaling pathways is higher in male lung AT1 and AT2**  
.060 **cells than in female lung AT1 and AT2 cells.**

.061

.062 (A) Interferon-relevant signatures enriched for genes differentially expressed in AT1 female  
.063 group versus AT1 male group using gene set enrichment analysis (GSEA). X-axis title “ES”  
.064 represents the GSEA enrichment score. Y-axis represents the name of the signatures. Dot size  
.065 represents the  $-\log_{10}(\text{FDR}_q\text{-value} + 0.001)$ . Dot color represents the significance (left); For  
.066 each significant signature, the top differentially expressed genes, both up- and downregulated,  
.067 are listed (right).

.068 (B) GSEA enrichment plot (score curves) of the top enriched gene set from Figure 2A. The y-  
.069 axis represents enrichment score (ES) and the x-axis are genes (vertical black lines)  
.070 represented in the gene set. The green line connects points of ES and genes. ES is the  
.071 maximum deviation from zero as calculated for each gene going down the ranked gene list. The  
.072 colored band at the bottom represents the degree of correlation of genes with the AT1 male  
.073 group (red for positive and blue for negative correlation). Significance threshold set at  $\text{FDR} <$   
.074  $0.05$ .

.075 (C) Interferon-relevant signatures enriched for genes differentially expressed in AT2 female  
.076 group versus AT2 male group using GSEA. X-axis title “ES” represents the GSEA enrichment  
.077 score. Y-axis represents the name of the signatures. Dot size represents the  $-\log_{10}$   
.078  $(\text{FDR}_q\text{-value} + 0.001)$ . Dot color represents the significance (left); For each significant  
.079 signature, the top differentially expressed genes, both up- and downregulated, are listed (right).

.080 (D) GSEA enrichment plot (score curves) of the top enriched gene set from Figure 2C. The y-  
.081 axis represents enrichment score (ES) and the x-axis are genes (vertical black lines)  
.082 represented in the gene set. The green line connects points of ES and genes. ES is the  
.083 maximum deviation from zero as calculated for each gene going down the ranked gene list. The  
.084 colored band at the bottom represents the degree of correlation of genes with the AT2 male

.085 group (red for positive and blue for negative correlation). Significance threshold set at FDR <  
.086 0.05.

.087 (E) Expression of common interferon signaling genes in male and female AT1 cells. Genes  
.088 showing significant difference between male and female group are highlighted in red.

.089 (F) Expression of common interferon signaling genes in male and female AT2 cells. Genes  
.090 showing significant difference between male and female group are highlighted in red.

.091

.092 **Figure 5. Interferon-stimulated JAK/STAT signaling, instead of AR-dependent signaling,**  
.093 **transactivates the expression of SARS-CoV2 receptors, TMPRSS2 and ACE2, in human**  
.094 **pulmonary alveolar epithelium.**

.095

.096 (A) To verify the activation of the downstream effectors in response to INF stimulation, AEpiC  
.097 cells first pre-treated with JAK inhibitor, Tofacitinib, with indicated concentration for 1.5 hours,  
.098 then cells were stimulated with 20 nM IFN $\alpha$  for another 16 hours. Total lysates were lysed in ice-  
.099 cold RIPA buffer and subjected to western blot to analyze the activation of STAT1 and STAT2,  
.100 with GDI as an internal loading control.

.101

.102 (B and C) Analysis of IFN $\alpha$  and AR-dependent signaling in the expression of SARS-CoV-2  
.103 receptors in pulmonary alveolar epitheliums. LNCAP, Calu-3, and AEpiC cells were either  
.104 treated with DHT alone (10 nM, 24 hours), IFN $\alpha$  alone (20 nM, 16 hours), or in combination.  
.105 After treatment, quantitative reverse transcription PCR (RT-qPCR) analysis of *TMPRSS2* and  
.106 *ACE2* was performed to assess the expression of SARS-CoV-2 receptors, with *18S* ribosomal  
.107 RNA as an endogenous control.

.108

.109 (D and F) In order to directly examine whether p-STAT1 is capable of transactivates SARS-CoV-  
.110 2 receptors in response to interferon or AR-dependent stimulation,  $1 \times 10^6$  AEpiC cells were either  
.111 treated with DHT alone (10 nM, 24 hours), IFN $\alpha$  alone (20 nM, 16 hours), or in combination.  
.112 Cells were lysed in a non-denaturing lysis buffer and subjected to chromatin immunoprecipitation  
.113 (ChIP) of p-STAT1, so as to investigate the enrichment of p-STAT1 on the enhancer and the  
.114 promoter region of both *TMPRSS2(Top)* and *ACE2(Bottom)*.

.115

.116 (E and G) The occupancy of both active transcription markers (H3K4me3, Pol II, and Pol II S2p)  
.117 and a suppressive transcription marker (H3K27me3) on the regulatory region of SARS-CoV-2  
.118 receptors was also applied to investigate the transcriptional alteration of *TMPRSS2(Top)* and  
.119 *ACE2(Bottom)* in copying with interferon response and AR-dependent signaling in AEpiC cells.  
.120 Results are reported as mean  $\pm$  SD. Comparisons between two groups were performed using  
.121 an unpaired two-sided Student's t test ( $p < 0.05$  was considered significant). Comparison of  
.122 multiple conditions was done with One-way or two-way ANOVA test. All experiments were  
.123 reproduced at least three times, unless otherwise indicated.

.124

.125

.126 **Figure 6. Interferons  $\alpha/\beta$  and  $\lambda$  conspire to upregulate the expression of ACE2 and**  
.127 **TMPRSS2 and induce robust viral entry.**

.128 (A) *ACE2* mRNA expression level in response to different types of interferon stimulation. AEpiC  
.129 cells treated with 10 nM IFN $\alpha$  (upper left), 10 nM IFN $\beta$  (upper right), 10 ng/ml IFN $\gamma$  (lower left)  
.130 or 1  $\mu$ g/ml IFN $\lambda$  (lower right) for the indicated times (6, 12, 24, 48 hours). Cells were subjected  
.131 to RT-qPCR analysis to quantify the *ACE2* mRNA change, with *18S* as an endogenous control.

.132 (B) *TMPRSS2* mRNA expression level in response to different types of interferon stimulation.  
.133 AEpiC cells treated with 10 nM IFN $\alpha$  (upper left), 10 nM IFN $\beta$  (upper right), 10 ng/ml IFN $\gamma$  (lower  
.134 left) or 1  $\mu$ g/ml IFN $\lambda$  (lower right) for the indicated times (6, 12, 24, 48 hours). Cells were  
.135 subjected to RT-qPCR analysis to quantify the *TMPRSS2* mRNA change, with *18S* as an  
.136 endogenous control.

.137  
.138 (C) Visualization of the alteration of SARS-CoV-2 receptors expression during type I and type III  
.139 interferon stimulation. Calu-3 cells were either treated with PBS, 10 nM IFN $\alpha$  (left) or 1  $\mu$ g/ml IFN $\lambda$   
.140 (right) for 16 hours. Then, cells were subjected to immunofluorescent stain to investigate the  
.141 abundance of *ACE2* and *TMPRSS2*. DAPI was used for nuclei staining (Scale bar = 100  $\mu$ m).  
.142

.143 (D) The Efficacy of different JAK and protease inhibitors in the blockade of SARS-CoV-2  
.144 pseudotype entry. AEpiC cells were incubated for 12 hours at different concentrations of  
.145 fedratinib, ruxolitinib, tofacitinib, camostat, and nafamostat, with PBS or 10 nM IFN $\alpha$  for 16 hours  
.146 before viral infection. The transduction efficiency of the virus was quantified 48 hours post-  
.147 transduction by measuring the activity of firefly luciferase in cell lysates.  
.148

.149 (E) AEpiC cells were transfected with 2  $\mu$ g/ml dsDNA or 100 ng/ml LPS for 12 hours. *ACE2* (left)  
.150 and *TMPRSS2* (right) mRNA expression measured with RT-qPCR, with *18S* as an endogenous  
.151 control.  
.152

.153 (F) AEpiC cells were transfected with 2  $\mu$ g/ml poly (I: C) for different time points as  
.154 indicated. *ACE2* (left) and *TMPRSS2* (right) mRNA expression measured with RT-qPCR,  
.155 with *18S* as an endogenous control.  
.156

.157 (G) AEpiC were transfected with 2  $\mu$ g/ml poly (I: C) without or with 5  $\mu$ M TBKi (GSK8612), 500  
.158 nM ruxolitinib, or 1  $\mu$ M BAY-11-7082. RT-qPCR was performed for *ACE2* (top) and *TMPRSS2*  
.159 (bottom), with *18S* as an endogenous control.  
.160

.161  
.162 (H) JAK inhibitors block the Type I and Type III interferon-induced SARS-CoV-2 pseudotype  
.163 entry. AEpiC cells were incubated for 12 hours with different concentrations of camostat,  
.164 nafamostat (Left), fedratinib and ruxolitinib (Right) and were stimulated with either PBS or 10 nM  
.165 IFN $\alpha$  for 16 hours before viral infection. The transduction efficiency of the virus was quantified  
.166 48 hours post-transduction by measuring the activity of firefly luciferase in cell lysates.  
.167

.168 (I) AEpiC cells were incubated for 12 hours with different concentrations of ruxolitinib and were  
.169 stimulated with either PBS or 10 nM IFN $\alpha$  plus 1  $\mu$ g/ml IFN $\lambda$  for 16 hours before viral infection.  
.170 The transduction efficiency of the virus was quantified 48 hours post-transduction by measuring  
.171 the activity of firefly luciferase in cell lysates. Results are reported as mean  $\pm$  SD. Comparisons  
.172 between two groups were performed using an unpaired two-sided Student's t test ( $p < 0.05$  was



.173 considered significant). Comparison of multiple conditions was done with One-way or two-way  
.174 ANOVA test. All experiments were reproduced at least three times, unless otherwise indicated.

.175

.176 **Figure 7. TNF $\alpha$  models severe SARS-COV2 disease and cytokine storm in pulmonary**  
.177 **alveolar epithelial cells.**

.178

.179 (A) SARS-CoV-2 receptors mRNA expression level in response to TNF $\alpha$ , IFN $\gamma$ , cytokines  
.180 presented in the advanced lung disease of COVID-19 patients. AEpiC cells were treated with  
.181 PBS, 10 ng/ml TNF $\alpha$ , 10 ng/ml IFN $\gamma$ , or in combination for 24 hours. *ACE2* (left) and *TMPRSS2*  
.182 (right) mRNA expression measured with RT-qPCR, with *18S* as an endogenous control.

.183

.184 (B) Enrichment of p-STAT3 on the enhancer and the promoter of *ACE2* from ChIP-qPCR in  
.185 control and IFN $\gamma$  of AEpiC cells.

.186

.187 (C) Enrichment of NF-kB p65 on the enhancer and the promoter of *TMPRSS2* gene from ChIP-  
.188 qPCR in control and TNF $\alpha$  of AEpiC cells.

.189

.190 (D) The efficacy of NF-kB inhibitor and JAK1 inhibitor in the suppression of SARS-CoV-2  
.191 receptors expression. AEpiC cells were pre-treated with either 1  $\mu$ M BAY-11-7082, 500 nM  
.192 tofacitinib, or in combination for 12 hours and then stimulated with either 10 ng/ml TNF $\alpha$ , 10 nM  
.193 IFN $\alpha$ , 10 ng/ml IFN $\gamma$ , or in combination for another 24 hours. RT-qPCR analysis was performed  
.194 to assess the mRNA expression level of *ACE2* (top) and *TMPRSS2* (bottom), with *18S* as an  
.195 endogenous control.

.196

.197 (E) The dependency of different JAKs on the *ACE2* expression during IFN $\gamma$  stimulation. AEpiC  
.198 cells were pre-treated with either 500 nM tofacitinib, 500 nM fedratinib, or 500 nM ruxolitinib for  
.199 12 hours and then stimulated with 10 ng/ml IFN $\gamma$  for another 24 hours. RT-qPCR analysis was  
.200 performed to assess the mRNA expression level of *ACE2* (top) and *TMPRSS2* (bottom), with  
.201 *18S* as an endogenous control.

.202

.203 (F) AEpiC cells were treated with either PBS, 10 ng/ml TNF $\alpha$ , 10 nM IFN $\alpha$ , 10 ng/ml IFN $\lambda$ , or in  
.204 combinations for 24 hours. *TMPRSS2* mRNA expression measured by RT-qPCR, with *18S* as  
.205 an endogenous control.

.206

.207 (G) The efficacy of NF-kB inhibitor and JAK1/2 inhibitor in the blockade of SARS-CoV-2  
.208 pseudotype entry in the COVID-19 advanced lung disease model. AEpiC cells were incubated  
.209 for 12 hours with different concentrations of BAY-11-7082, ruxolitinib, or in combination, and  
.210 stimulated without or with 10 nM IFN $\alpha$ , 1  $\mu$ g/ml IFN $\lambda$ , and 10 ng/ml TNF $\alpha$  for 16 hours before  
.211 viral infection. The transduction efficiency of the virus was quantified 48 hours post-transduction  
.212 by measuring the activity of firefly luciferase in cell lysates. Results are reported as mean  $\pm$  SD.  
.213 Comparisons between two groups were performed using an unpaired two-sided Student's t test  
.214 ( $p < 0.05$  was considered significant). Comparison of multiple conditions was done with One-  
.215 way or two-way ANOVA test. All experiments were reproduced at least three times, unless  
.216 otherwise indicated.

.217

.218

.219

.220

.221  
.222  
.223  
.224  
.225  
.226  
.227  
.228  
.229  
.230  
.231  
.232  
.233  
.234  
.235  
.236  
.237  
.238  
.239  
.240  
.241  
.242  
.243  
.244  
.245  
.246  
.247  
.248  
.249  
.250  
.251  
.252  
.253  
.254  
.255  
.256  
.257  
.258  
.259  
.260  
.261  
.262  
.263  
.264  
.265  
.266  
.267  
.268

## Supplementary Figure Legends

### Fig. S1. Gene expression of ACE2 and TMPRSS2 occurs largely in AT1 and AT2 epithelial cells.

(A) UMAP visualization of 93,770 human lung cells colored according to sample.

(B) Entropy of batch mixing for sample batches (n = 24; right); positive controls, in which clusters were assigned as batches (center); and negative controls, in which cells were assigned random batch labels in accordance with batch size distribution (left). Bars show the 25th, 50th and 75<sup>th</sup> percentiles.

(C) UMAP visualization of 93,770 human lung cells colored by initial cluster identity.

(D) Cluster tree showing the relation between different clusters of cells. Clusters identified to be similar to each other are highlighted in green (clusters 1 and 7) or pink (clusters 0 and 3).

(E) Expression of selected marker genes by cluster. Clusters identified to be similar to each other by similar expression pattern of markers are highlighted in green (clusters 1 and 7) or pink (clusters 0 and 3).

### Fig. S2. The expression level of ACE2 and TMPRSS2 is sex-related.

(A) The percentages of cells of each cell type analyzed at individual sample level in males and females.

(B) The ratio of ACE2+/TMPRSS2+ double positive cells in smoking and non-smoking individual groups in AT1 and AT2 cells. \*\* p < 0.01.

(C) Normalized expression of ACE2 and TMPRSS2 in each cluster of lung cells from Liao et al. Nat Med. 2020, which includes a total of 66,452 cells from 9 patients and 4 controls.

(D and E) Normalized expression of ACE2 (D) and TMPRSS2 (E) in epithelial cells in patients with COVID-19 and healthy controls.

(F) Normalized expression of AGTR1 (AT1) and AVPR1B in each cluster of normal lung cells.

(G) Expression of AGTR1 (AT1) and AVPR1B across all identified cell types in normal lungs. The size of the dot correlates to the percentage of cells within a cell type in which AGTR1/AVPR1B was detected. The color encodes the average expression level.

(H) Analysis of the AVPR1B, AGTR1, ACE2 and TMPRSS2 in the AEpiC cells. 5x10<sup>5</sup> AEpiC cells were harvested and subjected to RT-qPCR analysis for the indicated genes, with 18S as an endogenous control. Results are reported as mean ± SD. Comparisons between two groups were performed using an unpaired two-sided Student's t test (p < 0.05 was considered significant). Comparison of multiple conditions was done with One-way or two-way ANOVA test. All experiments were reproduced at least three times, unless otherwise indicated.



.269  
.270  
.271  
.272  
.273  
.274  
.275  
.276  
.277  
.278  
.279  
.280  
.281  
.282  
.283  
.284  
.285  
.286  
.287  
.288  
.289  
.290  
.291  
.292  
.293  
.294  
.295  
.296  
.297  
.298  
.299  
.300  
.301  
.302  
.303  
.304  
.305  
.306  
.307  
.308  
.309  
.310  
.311  
.312  
.313  
.314  
.315  
.316

**Fig. S3. Lung-specific enhancers of TMPRSS2 are enriched in binding sites targeted by interferon transcription factors.**

(A) Genome browser tracks of H3K27ac and H3K4me3 ChIP-Seq data in different tissues of the expanded genomic region containing the TMPRSS2 gene. H3K27ac and H3K4me3 binding profiles are from publicly available ENCODE datasets.

(B) Genome browser tracks of H3K27ac and H3K4me3 ChIP-Seq data in different tissues of the expanded genomic region containing the ACE2 gene. H3K27ac and H3K4me3 binding profiles are from publicly available ENCODE datasets.

(C) Expression of AR, ESR1, and ESR2 in male and female AT1 cells.

(D) Expression of AR, ESR1, and ESR2 in male and female AT2 cells.

(E) GSEA gene sets involved in AR signaling enriched for genes differentially expressed in AT1 female group versus AT1 male group (left) or in AT2 female group versus AT2 male group (right). X-axis title “ES” represents the GSEA enrichment score. Y-axis represents the name of the signatures. Dot size represents the  $-\log_{10}(\text{nominal\_p\_value} + 0.001)$ . Dot color represents the significance.

(F) GSEA gene sets involved in ER signaling enriched for genes differentially expressed in AT1 female group versus AT1 male group (left) or the AT2 female group versus AT2 male group (right). X-axis title “ES” represents the GSEA enrichment score. Y-axis represents the name of the signatures. Dot size represents the  $-\log_{10}(\text{nominal\_p\_value} + 0.001)$ . Dot color represents the significance.

**Fig. S4. The activity of interferon signaling pathways is higher in male lung AT1 and AT2 cells than in female lung AT1 and AT2 cells.**

(A) GSEA signatures from hallmark gene sets enriched for genes differentially expressed in AT1 female group versus AT1 male group. X-axis title “ES” represents the GSEA enrichment score. Y-axis represents the name of the signatures. Dot size represents the  $-\log_{10}(\text{FDR\_q\_value} + 0.001)$ . Dot color represents the significance.

(B) GSEA signatures from canonical pathway gene sets enriched for genes differentially expressed in AT1 female group versus AT1 male group. X-axis title “ES” represents the GSEA enrichment score. Y-axis represents the name of the signatures. Dot size represents the  $-\log_{10}(\text{FDR\_q\_value} + 0.001)$ . Dot color represents the significance.

(C) GSEA signatures from GO biological process gene sets enriched for genes differentially expressed in AT1 female group versus AT1 male group. X-axis title “ES” represents the GSEA enrichment score. Y-axis represents the name of the signatures. Dot size represents the  $-\log_{10}(\text{FDR\_q\_value} + 0.001)$ . Dot color represents the significance.

(D) GSEA signatures from hallmark gene sets enriched for genes differentially expressed in AT2 female group versus AT2 male group. X-axis title “ES” represents the GSEA enrichment score.

.317 Y-axis represents the name of the signatures. Dot size represents the  $-\log_{10}$  (FDR<sub>q</sub>\_value +  
.318 0.001). Dot color represents the significance.

.319  
.320 (E) GSEA signatures from canonical pathway gene sets enriched for genes differentially  
.321 expressed in AT2 female group versus AT2 male group. X-axis title "ES" represents the GSEA  
.322 enrichment score. Y-axis represents the name of the signatures. Dot size represents the  $-\log_{10}$   
.323 (FDR<sub>q</sub>\_value + 0.001). Dot color represents the significance.

.324  
.325 (F) GSEA signatures from GO biological process gene sets enriched for genes differentially  
.326 expressed in AT2 female group versus AT2 male group. X-axis title "ES" represents the GSEA  
.327 enrichment score. Y-axis represents the name of the signatures. Dot size represents the  $-\log_{10}$   
.328 (FDR<sub>q</sub>\_value + 0.001). Dot color represents the significance.

.329  
.330 (G). Expression of interferon-stimulated genes in male (blue) and female (red) AT1 cells. Genes  
.331 showing significant difference between male and female group are highlighted in red.

.332  
.333 (H) Expression of interferon-stimulated genes in male (blue) and female (red) AT2 cells. Genes  
.334 showing significant difference between male and female group are highlighted in red.

.335  
.336 **Fig. S5. Interferon-stimulated JAK/STAT signaling, instead of AR-dependent signaling,**  
.337 **transactivates the expression of SARS-CoV2 receptors, TMPRSS2 and ACE2, in human**  
.338 **pulmonary alveolar epithelium.**

.339  
.340 (A, B, C) Analysis of the signaling components of the IFN-JAK-STAT pathway and COVID-19  
.341 advanced lung disease-related cytokines and its receptors in the AEpiC cells. 5x10<sup>5</sup> AEpiC cells  
.342 were harvested and subjected to RT-qPCR analysis for the indicated genes, with 18S as an  
.343 endogenous control.

.344  
.345 (D) The change of SARS-CoV-2 receptors mRNA expression level during Enzalutamide  
.346 treatment. Enzalutamide treatment (5  $\mu$ M) of AEpiC cells for the indicated times. RT-qPCR was  
.347 performed for ACE2 (left) and TMPRSS2 (right), with 18S as an endogenous control.

.348  
.349 (E) Enrichment of p-STAT1 on enhancer 1 and 3 of TMPRSS2 from ChIP-qPCR in control. 1x10<sup>6</sup>  
.350 AEpiC cells were either treated with DHT alone (10 nM, 24 hours), IFN $\alpha$  alone (20 nM, 16 hours),  
.351 or in combination. Cells were lysed in a non-denaturing lysis buffer and subjected to ChIP of p-  
.352 STAT1.

.353  
.354 (F and G) Enrichment of AR on the enhancer and the promoter regions of TMPRSS2 and ACE2  
.355 from ChIP-qPCR in control. 1x10<sup>6</sup> AEpiC cells were either treated with DHT alone (10 nM, 24  
.356 hours), IFN $\alpha$  alone (20 nM, 16 hours), or in combination. Cells were lysed in a non-denaturing  
.357 lysis buffer and subjected to ChIP of AR. Results are reported as mean  $\pm$  SD. Comparisons  
.358 between two groups were performed using an unpaired two-sided Student's t test ( $p < 0.05$  was  
.359 considered significant). Comparison of multiple conditions was done with One-way or two-way  
.360 ANOVA test. All experiments were reproduced at least three times, unless otherwise indicated.

.361  
.362 **Fig. S6. Interferons  $\alpha/\beta$  and I conspire to upregulate the expression of ACE2 and**  
.363 **TMPRSS2 and induce robust viral entry.**

.364

.365 (A) Calu-3 were treated with either PBS, 10 nM IFN $\alpha$ , 10 nM IFN $\beta$ , 10ng/ml IFN $\gamma$ , or 1  $\mu$ g/ml  
.366 IFN $\lambda$ . ACE2 mRNA expression measured with RT-qPCR, with 18S as an endogenous control.

.367

.368 (B) Calu-3 were treated with either PBS, 10 nM IFN $\alpha$ , 10 nM IFN $\beta$ , 10ng/ml IFN $\gamma$ , or 1  $\mu$ g/ml  
.369 IFN $\lambda$ . TMPRSS2 mRNA expression measured with RT-qPCR, with 18S as an endogenous  
.370 control.

.371

.372 (C) Activation of JAK-STAT signaling pathway and the expression of SARS-CoV-2 receptors in  
.373 pulmonary alveolar epitheliums during Type I and Type III interferon stimulation. AEpiC cells  
.374 were treated with 20 nM IFN $\alpha$  (left) or 1  $\mu$ g/ml IFN $\lambda$  (right) for the indicated times. Total lysates  
.375 were subjected to western blot with the indicated antibodies, with GDI as an internal loading  
.376 control. Source data-Supplementary Figure 6C-1. Source data-Supplementary Figure 6C-2.

.377

.378 (D) Calu-3 control cells or cells treated with 10 nM IFN $\alpha$  and 10nM IFN $\beta$ , or 1  $\mu$ g/ml IFN $\lambda$  for 3  
.379 hours were subjected to Co-IP. Either input (left), IgG, STAT1, or STAT2 (right) was  
.380 immunoprecipitated, and total lysates were subjected to western blot with the indicated  
.381 antibodies. Source data-Supplementary Figure 6D.

.382

.383 (E) SARS-CoV-2 receptors mRNA expression level in response to different combinations of  
.384 interferon stimulation. AEpiC cells were treated with 10 nM IFN $\alpha$ , 10 nM IFN $\beta$ , 10 ng/ml IFN $\gamma$  or  
.385 1  $\mu$ g/ml IFN $\lambda$ , alone or in different combinations as indicated in the graph. RT-qPCR was  
.386 performed for ACE2 (Left) and TMPRSS2 (Right), with 18S as an endogenous control.

.387

.388 (F) Calu-3 cells subjected to shRNA of ACE2 (left) or TMPRSS2 (right). 5 shRNAs used per  
.389 gene. ACE2 and TMPRSS2 mRNA expression measured with RT-qPCR, with 18S as an  
.390 endogenous control.

.391

.392 (G) Calu-3 cells silenced for control, ACE2 or TMPRSS2, and treated either with PBS or 10 nM  
.393 IFN $\alpha$  for 16 hours before viral infections. The transduction efficiency of the virus was quantified  
.394 48 hours post-transduction by measuring the activity of firefly luciferase in cell lysates. Results  
.395 are reported as mean  $\pm$  SD. Comparisons between two groups were performed using an  
.396 unpaired two-sided Student's t test ( $p < 0.05$  was considered significant). Comparison of multiple  
.397 conditions was done with One-way or two-way ANOVA test. All experiments were reproduced  
.398 at least three times, unless otherwise indicated.

.399

.400 **Fig. S7. TNF $\alpha$  models severe SARS-COV2 disease and cytokine storm in pulmonary**  
.401 **alveolar epithelial cells.**

.402

.403 (A) AEpiC cells treated with PBS, 10 ng/ml TNF $\alpha$  plus 10 ng/ml IFN $\gamma$  for 24 hours. ACE2,  
.404 TMPRSS2, STAT1, and STAT2 mRNA expression measured with RT-qPCR, with 18S as an  
.405 endogenous control.

.406

.407 (B) AEpiC cells were treated with different cytokines (all 10 ng/ml except 5ng/ml for IL-6) for 24  
.408 hours. ACE2 and TMPRSS2 mRNA expression measured with RT-qPCR, with 18S as an  
.409 endogenous control.

.410

.411 (C) Enrichment of p-STAT3 on the enhancer and the promoter of ACE2 from ChIP-qPCR in  
.412 control and IFN $\gamma$  of AEpiC cells. Enrichment of NF-kB p65 on the enhancer and the promoter of

.413 TMPRSS2 gene from CHIP-qPCR in control and TNF $\alpha$  of AEpiC cells. Results are reported as  
 .414 mean  $\pm$  SD. Comparisons between two groups were performed using an unpaired two-sided  
 .415 Student's t test ( $p < 0.05$  was considered significant). Comparison of multiple conditions was  
 .416 done with One-way or two-way ANOVA test. All experiments were reproduced at least three  
 .417 times, unless otherwise indicated.

.418  
 .419

.420 **Supplemental material**

.421

.422 **Supplementary Table 1**

.423 Resources table

.424

.425

**Reagent/Resource                      Source                      Identifier**

| <b>Antibodies</b>                                      |                         |                      |
|--------------------------------------------------------|-------------------------|----------------------|
| ACE2                                                   | R&D Systems             | AF933                |
| TMPRSS2                                                | Abcam                   | ab92323              |
| Jak2                                                   | Cell Signaling          | 3230                 |
| p-Jak2                                                 | Cell Signaling          | 3776                 |
| STAT1                                                  | Cell Signaling          | 14994                |
| p-STAT1                                                | Cell Signaling          | 9167                 |
| STAT2                                                  | Cell Signaling          | 72604                |
| p-STAT2                                                | Cell Signaling          | 88410                |
| STAT3                                                  | Cell Signaling          | 9139                 |
| p-STAT3                                                | Cell Signaling          | 9145                 |
| Jak1                                                   | Cell Signaling          | 3332                 |
| p-Jak1                                                 | Cell Signaling          | 3331                 |
| TYK2                                                   | Cell Signaling          | 9312                 |
| p-TYK2                                                 | Cell Signaling          | 9321                 |
| IRF9                                                   | Santa Cruz              | Sc-514648            |
| Jak3                                                   | Cell Signaling          | 3775                 |
| p-Jak3                                                 | Cell Signaling          | 5031                 |
| Rho-GDI                                                | Santa Cruz              | Sc-373724            |
| Rabbit IgG                                             | Cell Signaling          | 3900 (IP), 7074 (WB) |
| <b>Chemicals, Cell Lines, and Recombinant Proteins</b> |                         |                      |
| DMEM                                                   | ThermoFisher Scientific | 11965-092            |

|                                 |                         |               |
|---------------------------------|-------------------------|---------------|
| Alveolar Epithelial Cell Medium | FisherScientific        | NC9028239     |
| Penicillin G-Streptomycin       | Corning                 | 30004CI       |
| Trypsin-EDTA (0.25%)            | ThermoFisher Scientific | 2530054       |
| FBS                             | ThermoFisher Scientific | A4766801      |
| Calu-3                          | ATCC                    | HTB-55        |
| LNCap                           | ATCC                    | CRL-1740      |
| AEpiC                           | FisherScientific        | 501049330     |
| rhIL-8                          | R&D Systems             | 208-IL        |
| rhIL-6                          | R&D Systems             | 206-IL        |
| rhCCL20/MIP-3a                  | R&D Systems             | 360-MP        |
| rhCXCL1/GROa                    | R&D Systems             | 275-GR        |
| rhCCL3/MIP-1a                   | R&D Systems             | 270-LD        |
| rhIL-1a                         | Fisher                  | 200LA         |
| rhIL-13                         | Fisher                  | 213ILB        |
| rhTNF-a                         | R&D Systems             | 210-TA        |
| rhIFN-lambda                    | R&D Systems             | 1598-IL       |
| rhIFN-alpha                     | Sigma-Aldrich           | IF007         |
| rhIFN-beta                      | Sigma-Aldrich           | IF014         |
| rhIFN-gamma                     | R&D Systems             | 285-IF        |
| <b>TaqMan Probes</b>            |                         |               |
| ACE2                            | Fisher                  | Hs01085333_m1 |
| TMPRSS2                         | Fisher                  | Hs01122322_m1 |
| STAT1                           | Fisher                  | Hs01013996_m1 |
| STAT2                           | Fisher                  | Hs01013115_g1 |
| 18S                             | Fisher                  | Hs99999901_s1 |
| <b>Reagents</b>                 |                         |               |
| dsDNA naked                     | Invitrogen              | tlrl-patn     |
| Poly(I:C) LMW                   | Invitrogen              | tlrl-picw     |
| LPS                             | Invitrogen              | tlrl-pb5lps   |

| <b>Software and Algorithms</b>                       |                               |                                                                                                                                                     |
|------------------------------------------------------|-------------------------------|-----------------------------------------------------------------------------------------------------------------------------------------------------|
| R                                                    | R Development Core Team, 2016 | <a href="https://www.r-project.org/">https://www.r-project.org/</a>                                                                                 |
| Seurat v3.2.0                                        | Stuart et al., 2019           | <a href="https://satijalab.org/seurat/">https://satijalab.org/seurat/</a>                                                                           |
| Harmony                                              | Korsunsky et al., 2019        | <a href="https://github.com/immunogenomics/harmony">https://github.com/immunogenomics/harmony</a>                                                   |
| ENCODE                                               | ENCODE Consortium             | <a href="https://www.encodeproject.org">https://www.encodeproject.org</a>                                                                           |
| UCSC Genome Browser                                  | Kent et al., 2002             | <a href="https://genome.ucsc.edu">https://genome.ucsc.edu</a>                                                                                       |
| GeneHancer Regulatory Elements and Gene Interactions | Fishilevich et al., 2017      | <a href="https://genome.ucsc.edu/cgi-bin/hgTrackUi?db=hg19&amp;q=geneHancer">https://genome.ucsc.edu/cgi-bin/hgTrackUi?db=hg19&amp;q=geneHancer</a> |
| GSEA 20.0.5                                          | Tamayo, et al., 2005          | <a href="https://www.gsea-msigdb.org/gsea/index.jsp">https://www.gsea-msigdb.org/gsea/index.jsp</a>                                                 |

.426  
.427  
.428  
.429  
.430

### Supplementary Table 3

The Encyclopedia of DNA Elements (ENCODE) data sets

| <b>Experiment</b> | <b>File download</b> | <b>Target</b> | <b>Tissue</b>                                 |
|-------------------|----------------------|---------------|-----------------------------------------------|
| ENCSR153NDQ       | ENCFF250INB          | H3K4me3       | prostate gland male adult (37 years)          |
| ENCSR841AJO       | ENCFF121EZK          | H3K27ac       | prostate gland male adult (37 years)          |
| ENCSR074WIB       | ENCFF602GRK          | H3K4me3       | upper lobe of left lung male adult (37 years) |
| ENCSR505YFA       | ENCFF027NNY          | H3K27ac       | upper lobe of left lung male adult (37 years) |
| ENCSR344TLI       | ENCFF249QWR          | H3K4me3       | right lobe of liver female adult (53 years)   |
| ENCSR981UJA       | ENCFF599LSB          | H3K27ac       | right lobe of liver female adult (53 years)   |
| ENCSR807XUB       | ENCFF898XDY          | H3K27ac       | sigmoid colon male adult (37 years)           |
| ENCSR960AAL       | ENCFF378PGI          | H3K4me3       | sigmoid colon male adult (37 years)           |
| ENCSR640XRV       | ENCFF284LUF          | H3K27ac       | transverse colon male adult (37 years)        |
| ENCSR813ZEY       | ENCFF604IEC          | H3K4me3       | transverse colon male adult (37 years)        |
| ENCSR343ZOV       | ENCFF297RMA          | H3K4me3       | coronary artery female adult (53 years)       |
| ENCSR443UYU       | ENCFF172MCO          | H3K27ac       | coronary artery female adult (53 years)       |
| ENCSR015GFK       | ENCFF772QFT          | H3K27ac       | thoracic aorta male adult (37 years)          |
| ENCSR930HLX       | ENCFF712GED          | H3K4me3       | thoracic aorta male adult (37 years)          |

.431  
.432  
.433



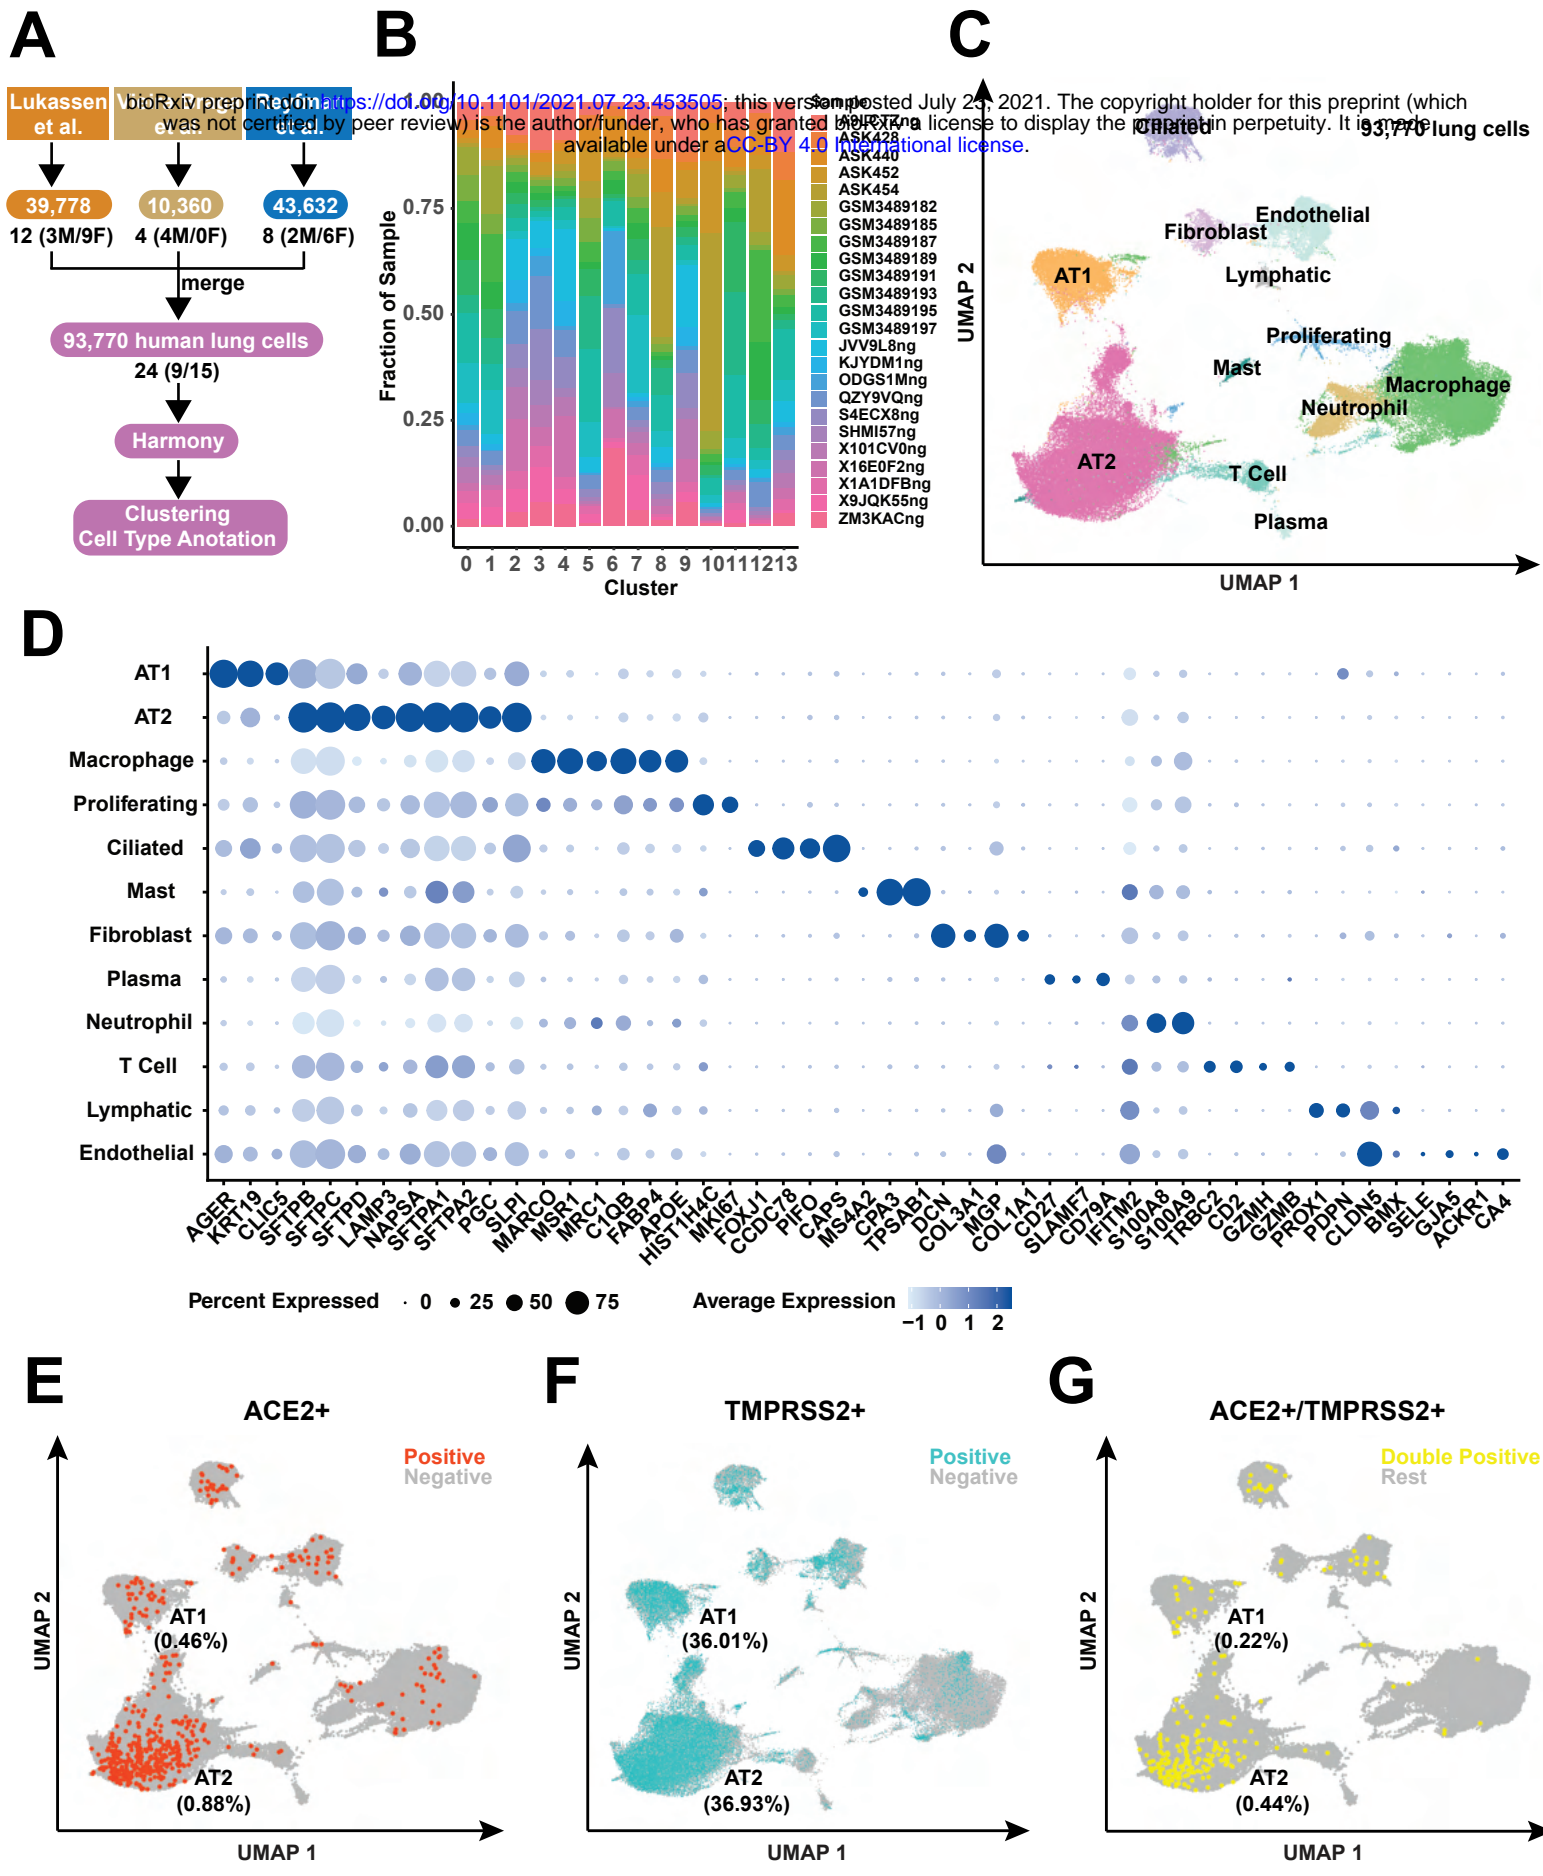

Figure 1

**A****ACE2**

bioRxiv preprint doi: <https://doi.org/10.1101/2021.07.23.453505>; this version posted July 23, 2021. The copyright holder for this preprint (which was not certified by peer review) is the author/funder, who has granted bioRxiv a license to display the preprint in perpetuity. It is made available under aCC-BY 4.0 International license.

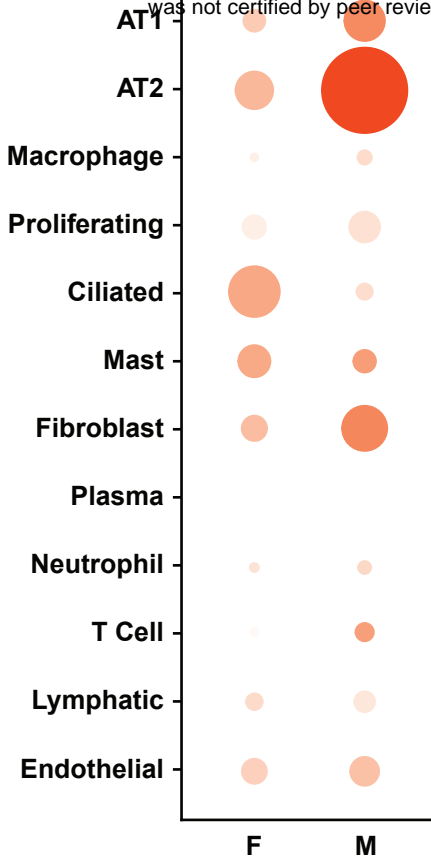**B****TMPRSS2**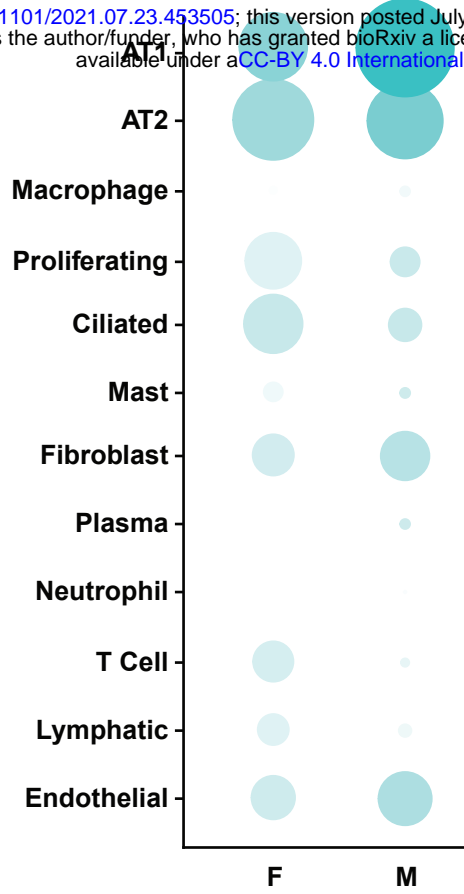**C****ACE2**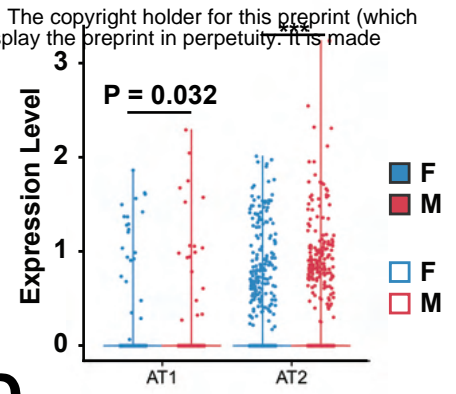**D****TMPRSS2**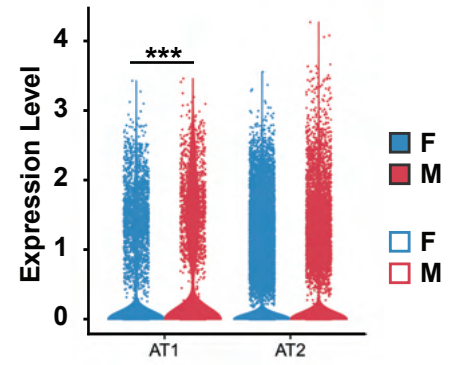**E****ACE2+/TMPRSS2+**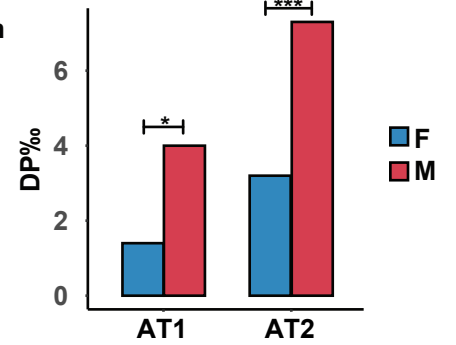

Percent Expressed Average Expression Percent Expressed Average Expression

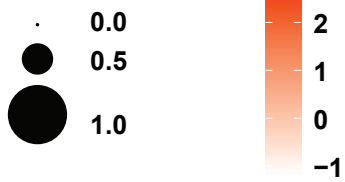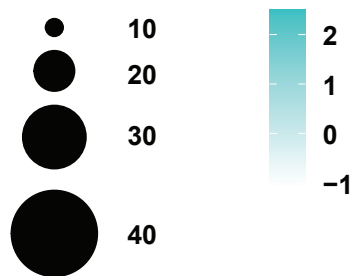**Figure 2**

**A**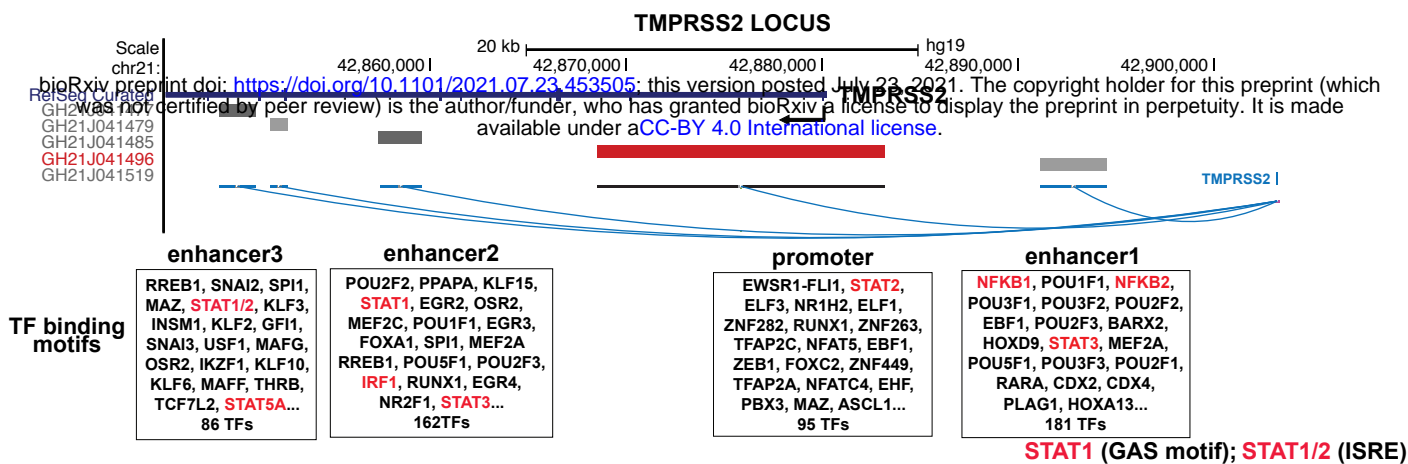**B**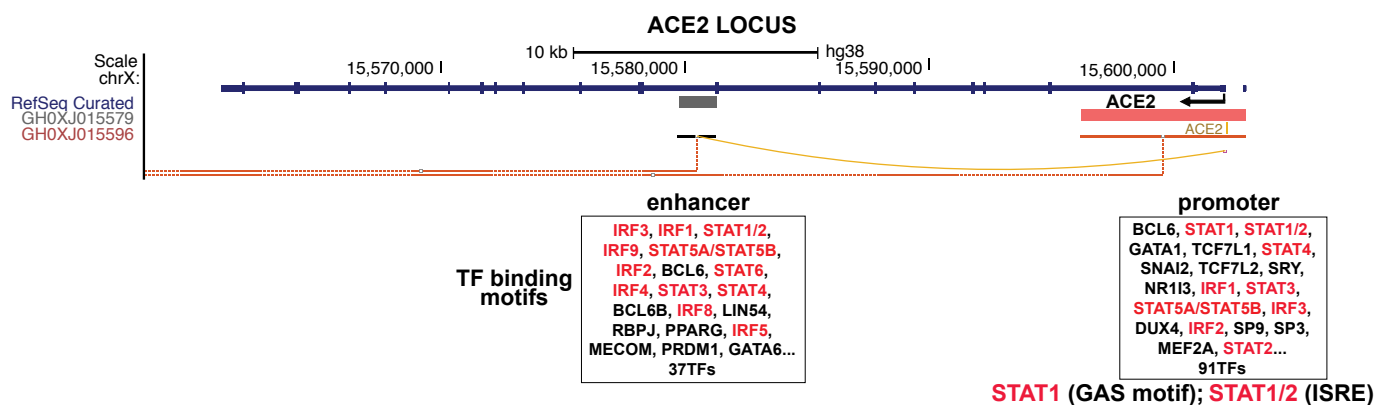**C**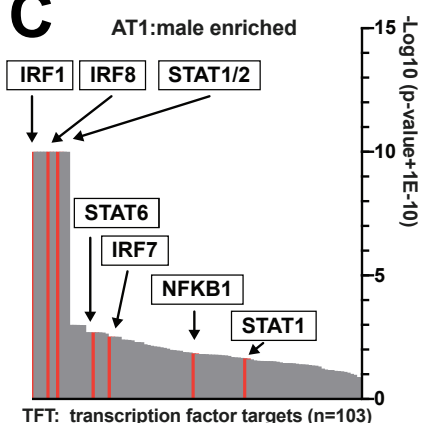**D**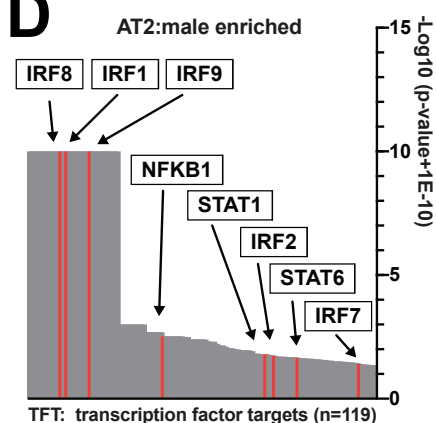**E**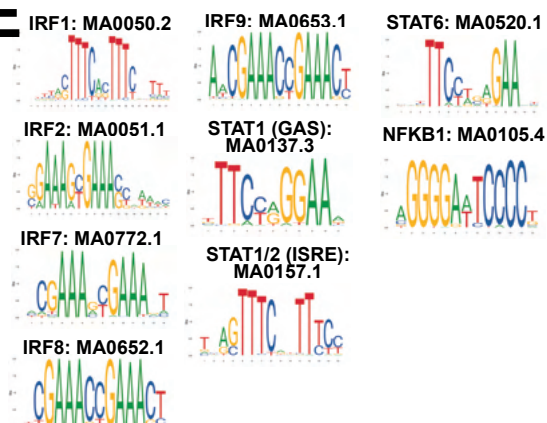**F**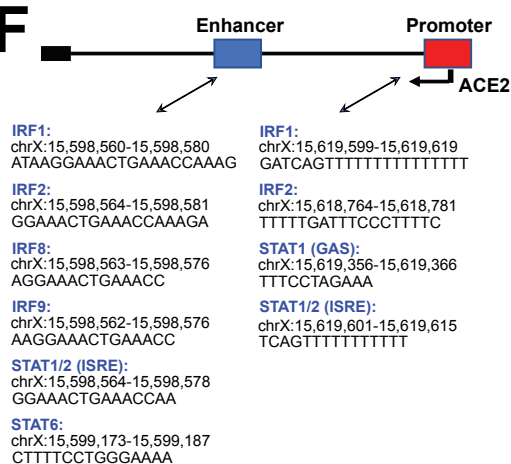**G**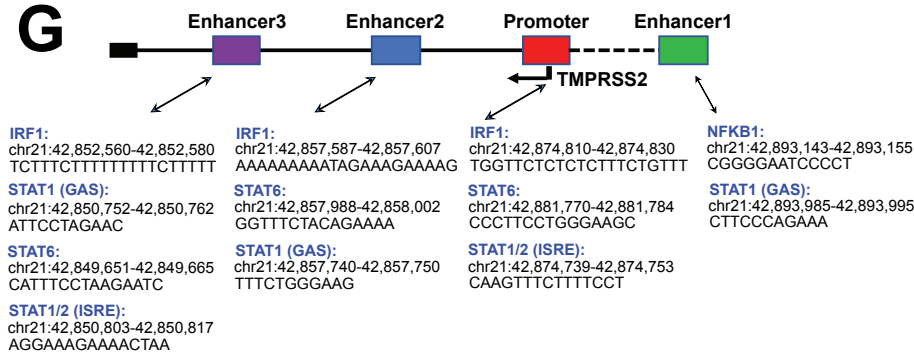**Figure 3**

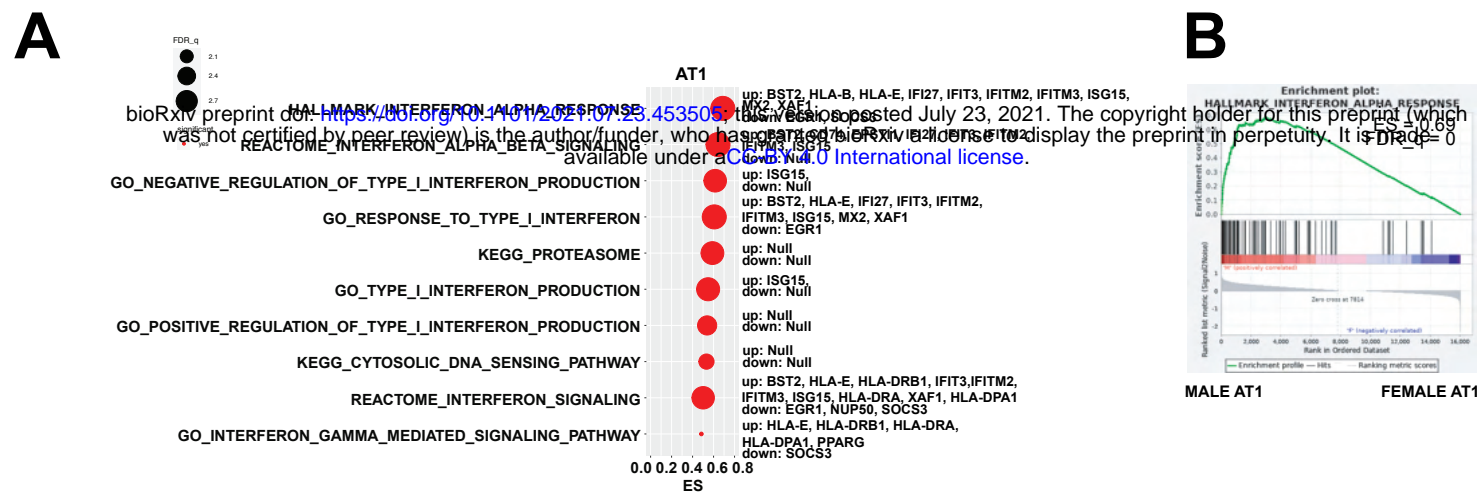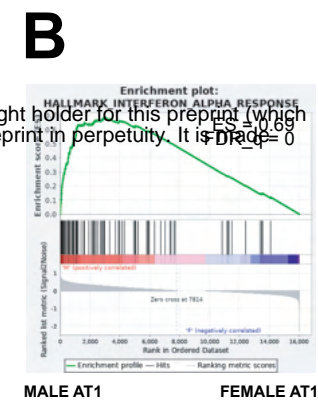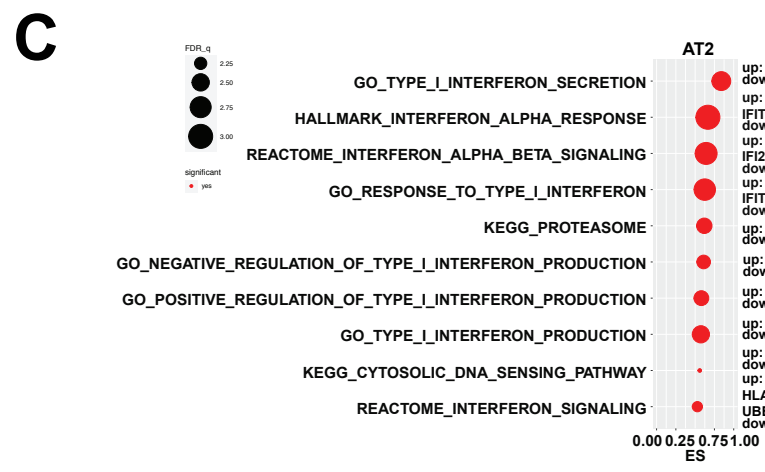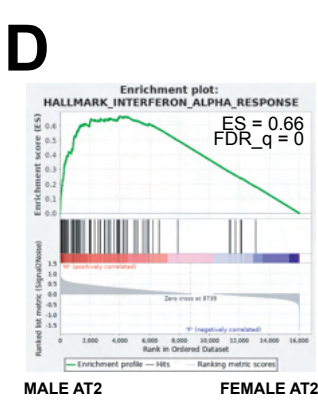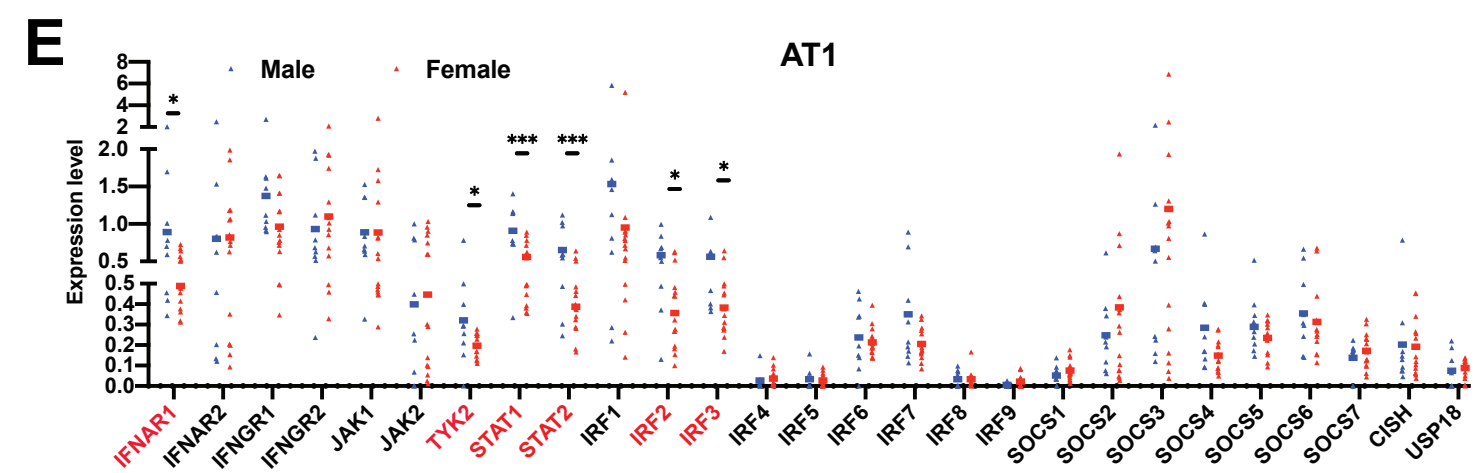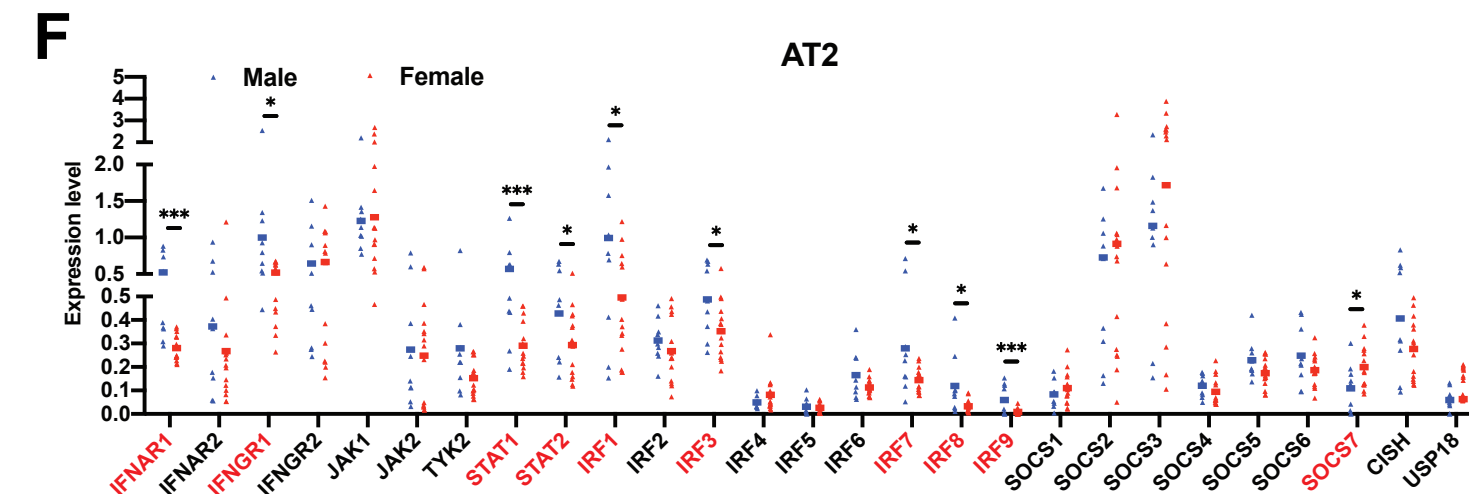

**Figure 4**

**A**

bioRxiv preprint doi: <https://doi.org/10.1101/2021.07.23.453505>; this version posted July 23, 2021. The copyright holder for this preprint (which was not certified by peer review) is the author/funder, who has granted bioRxiv a license to display the preprint in perpetuity. It is made available under aCC-BY 4.0 International license.

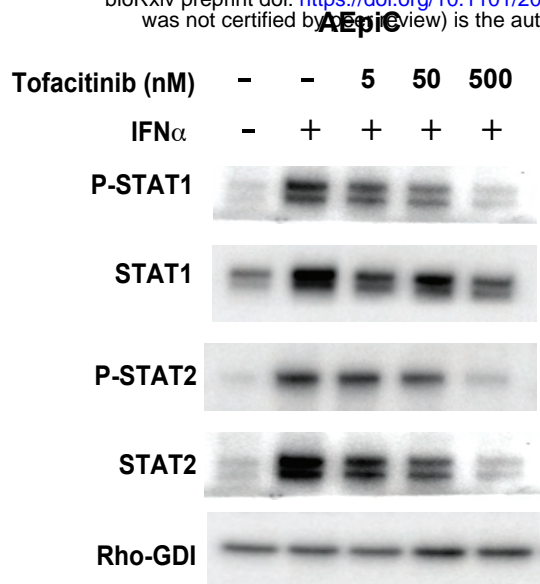**B**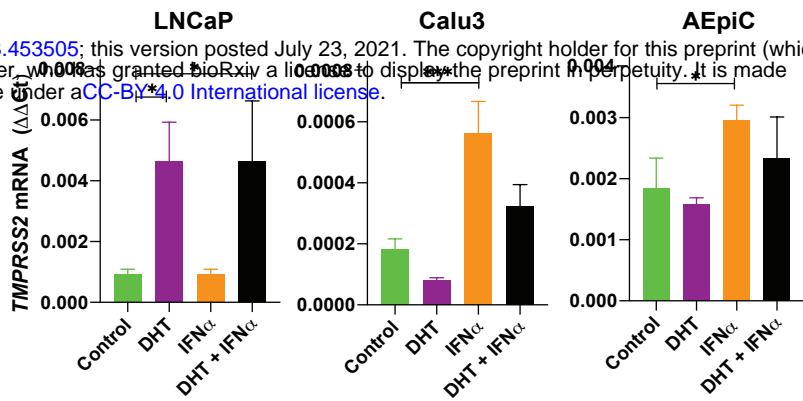**C**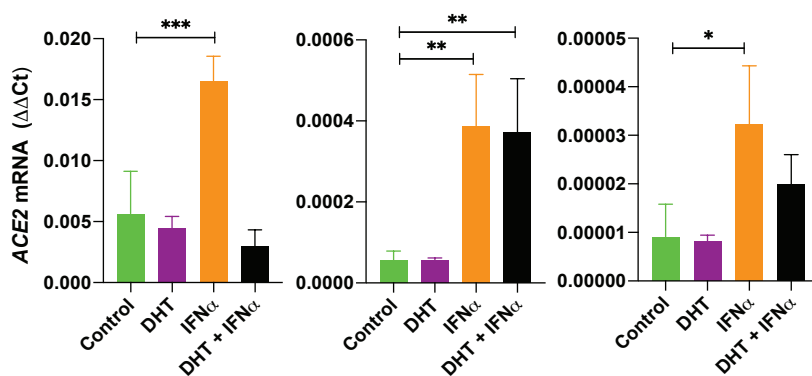**D**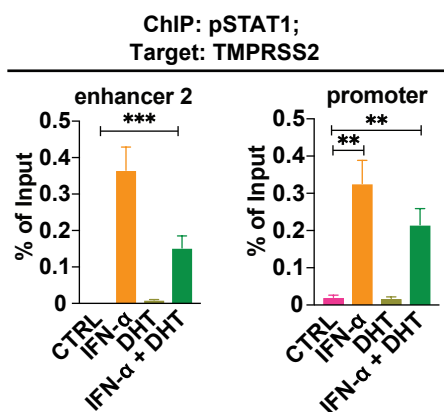**E**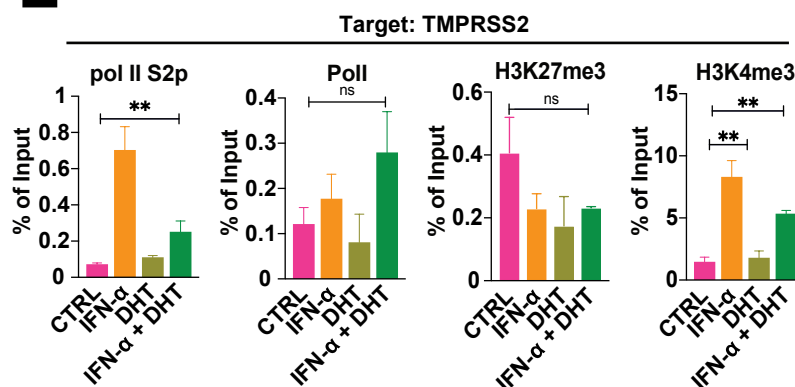**F**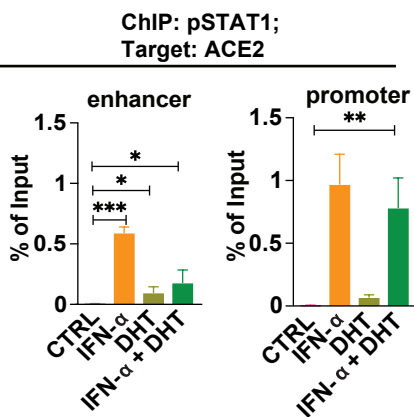**G**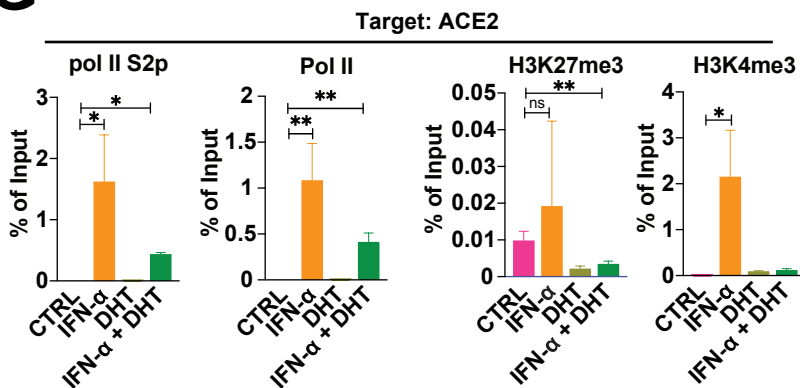**Figure 5**

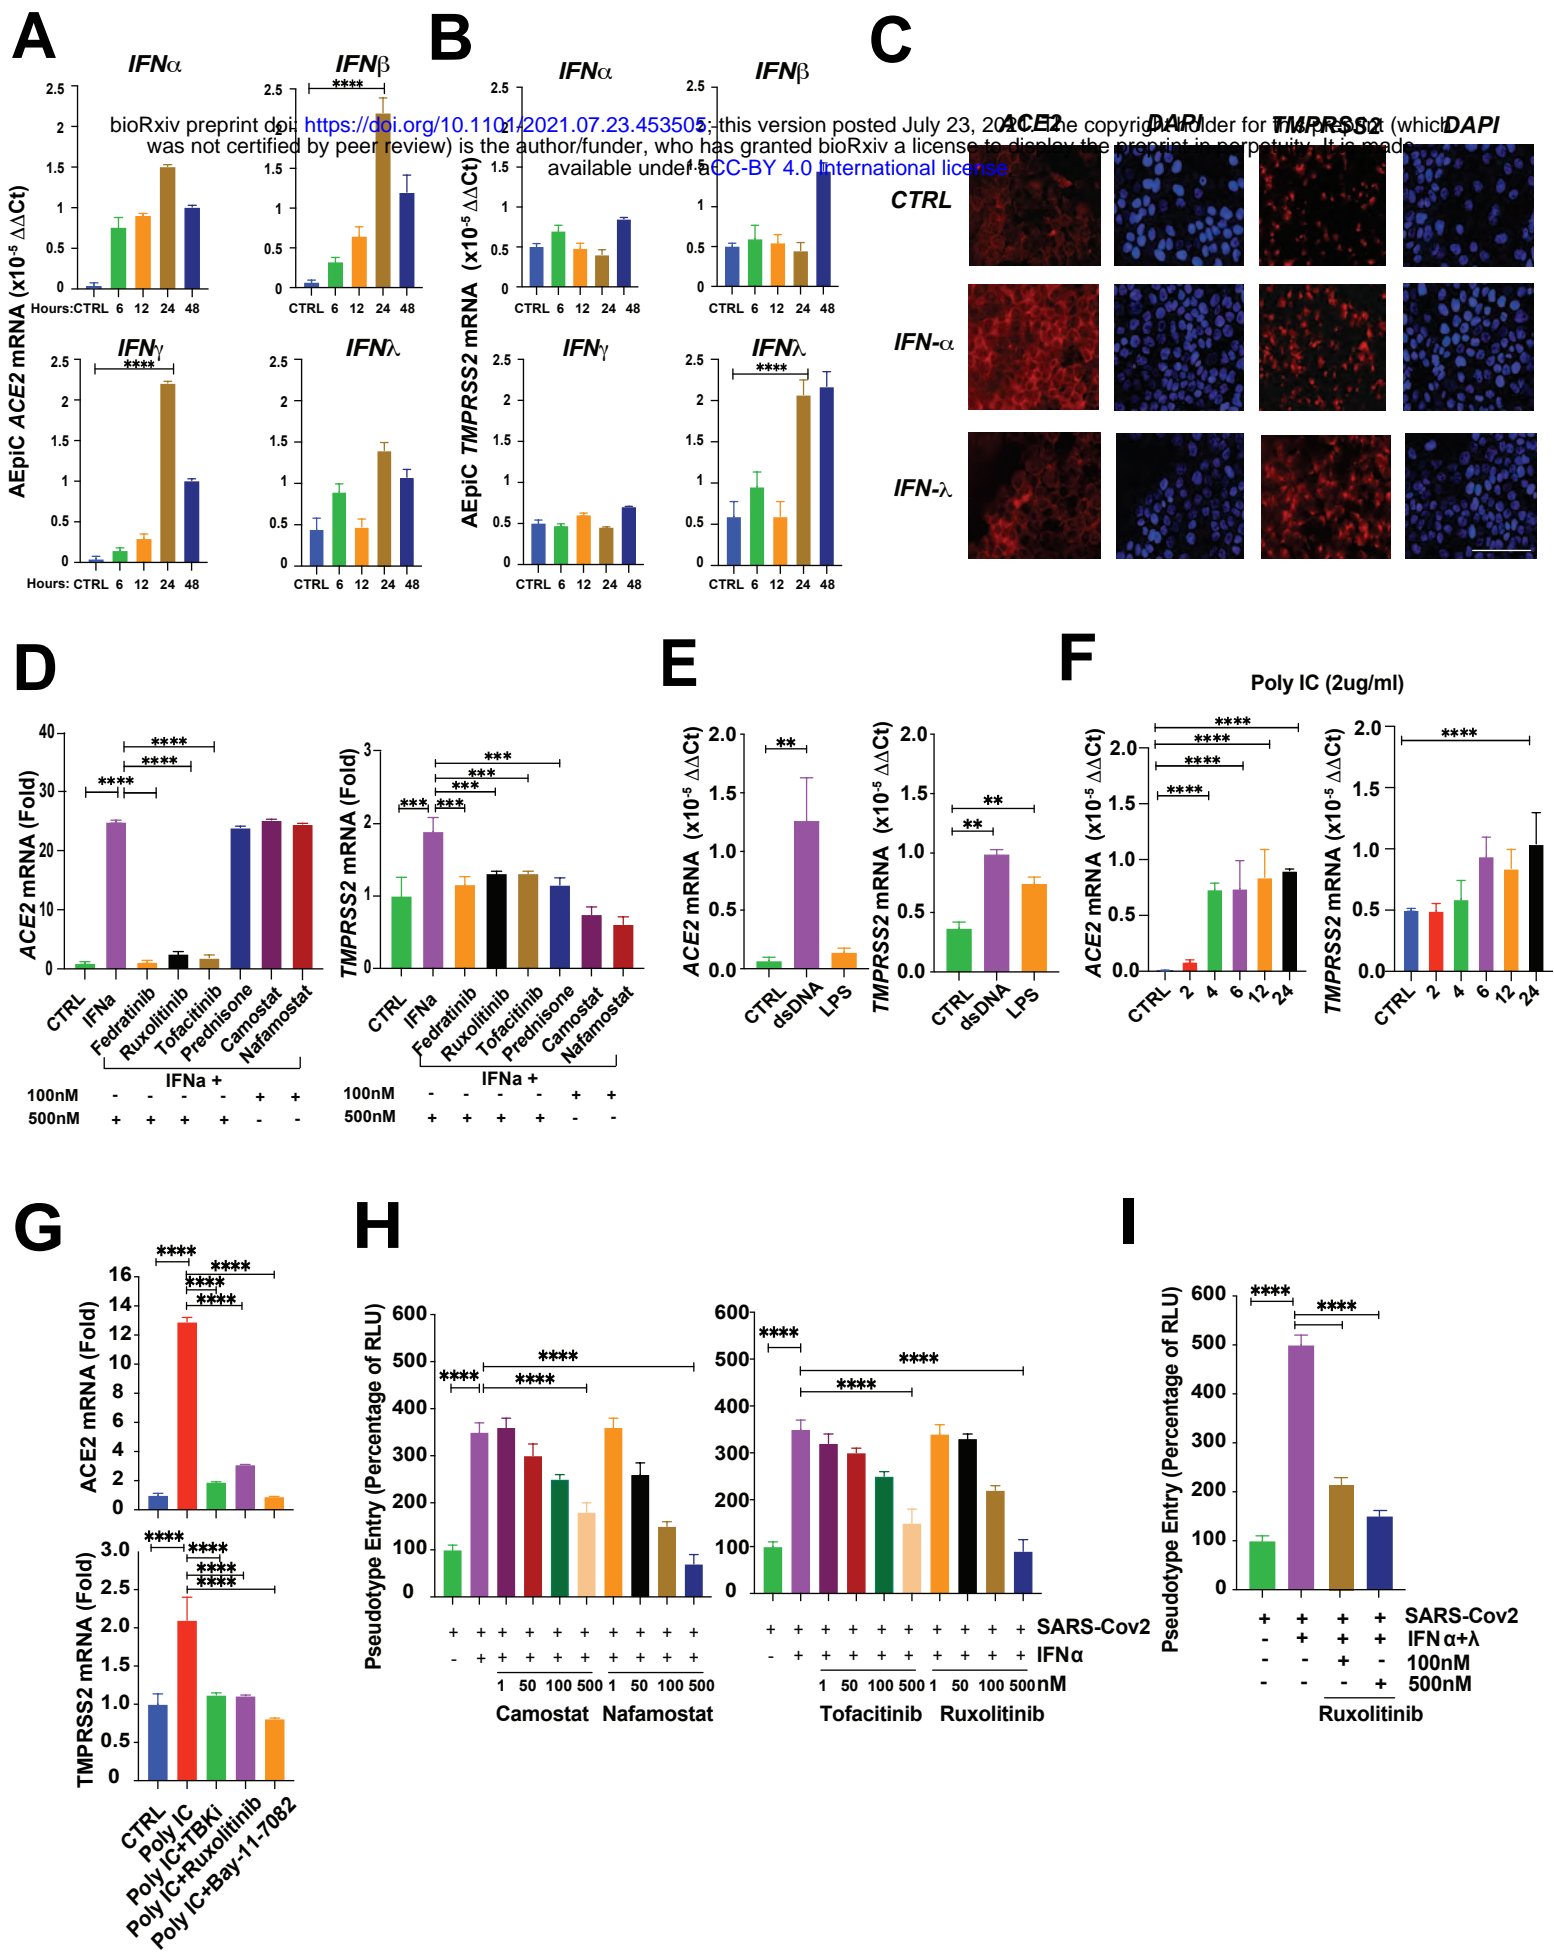

Figure 6



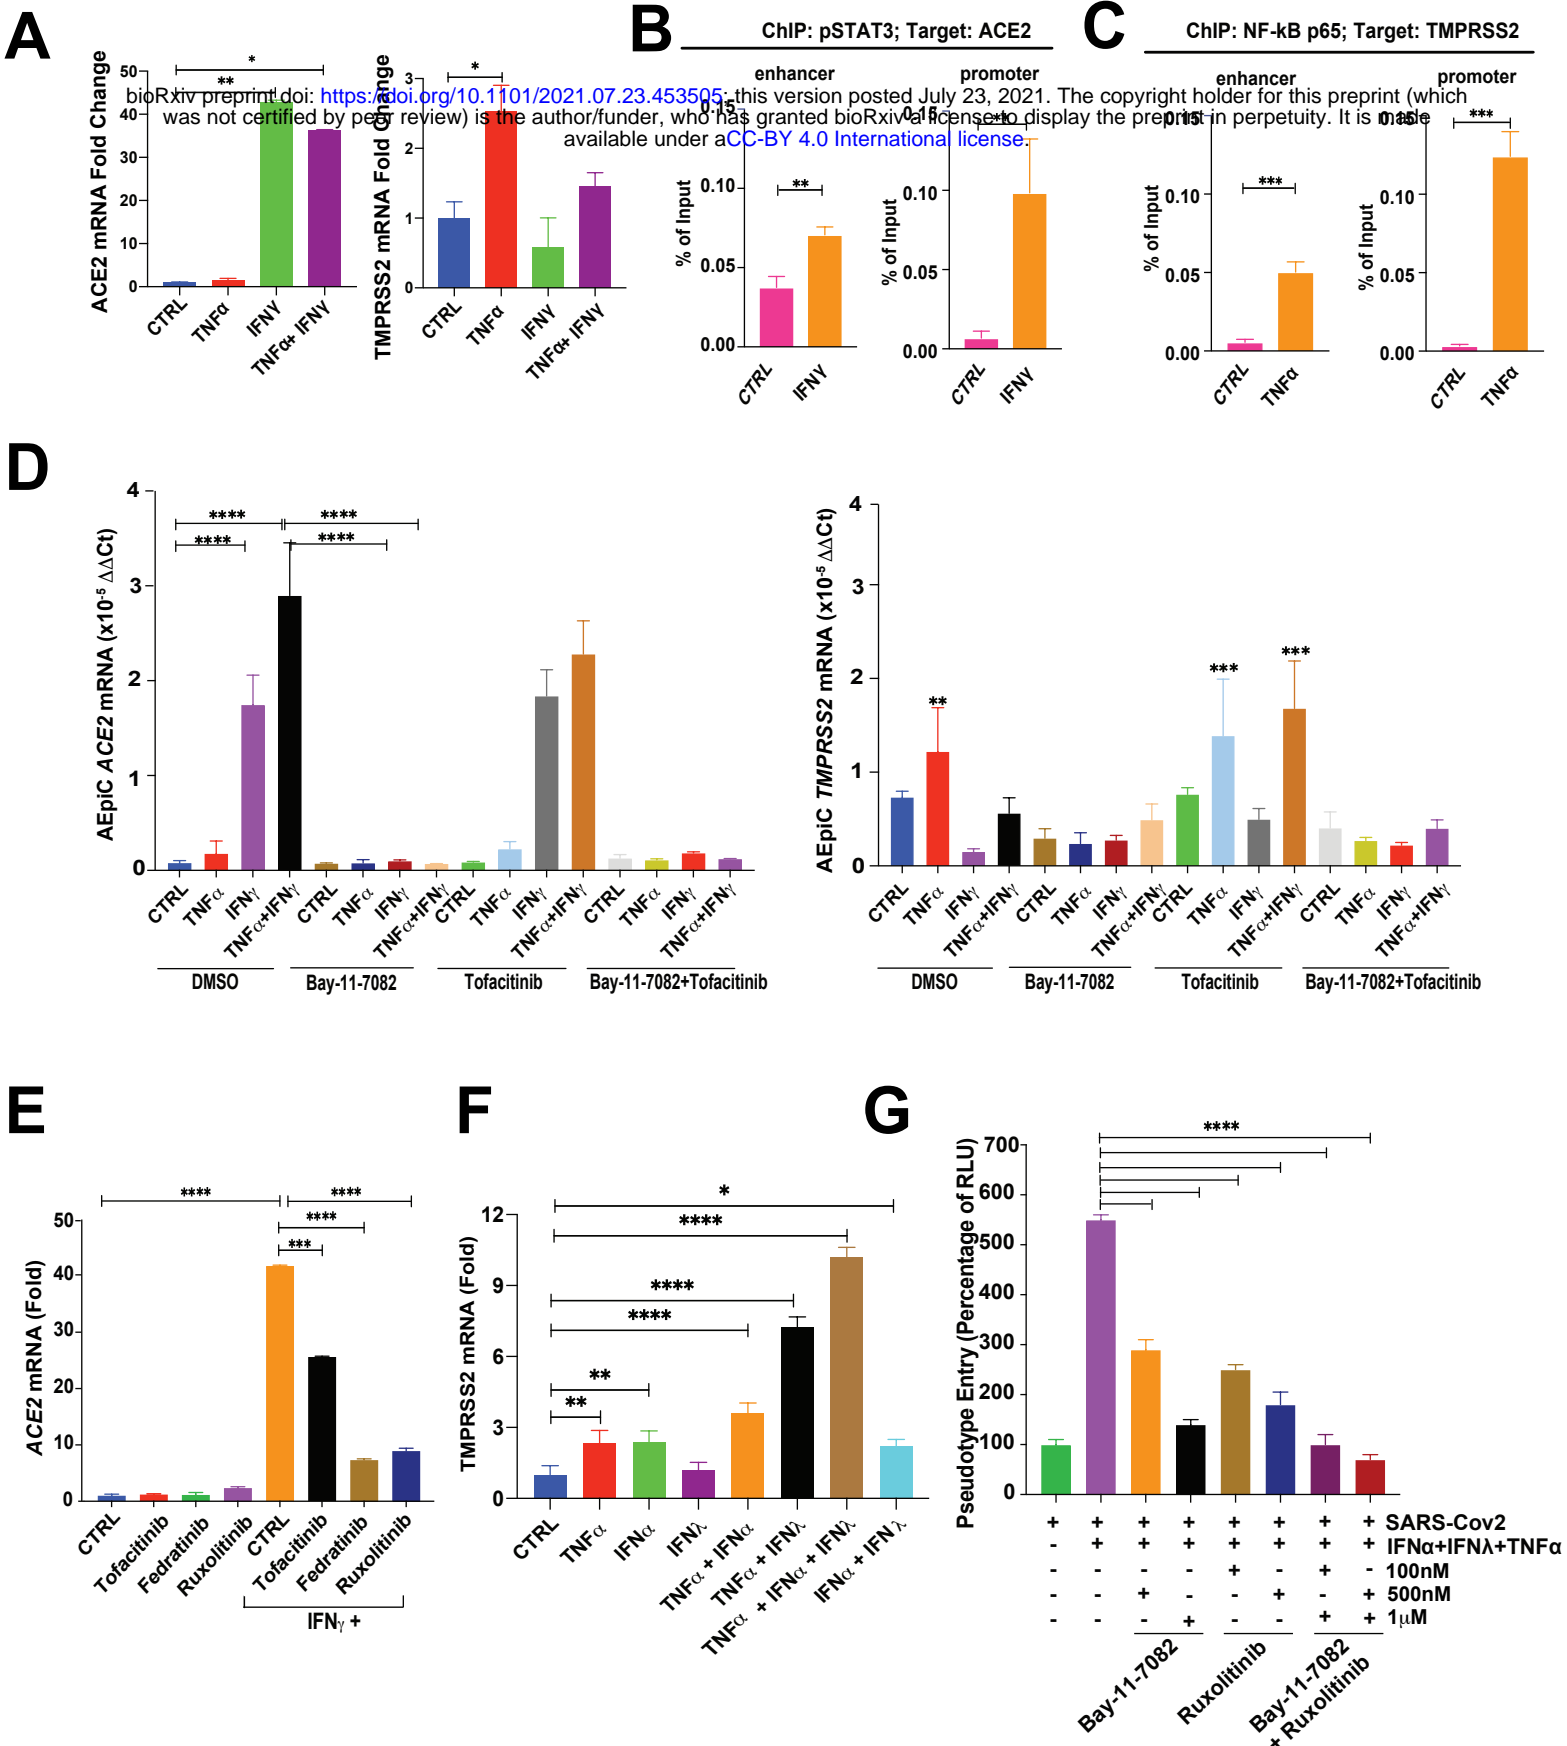

**Figure 7**

**A**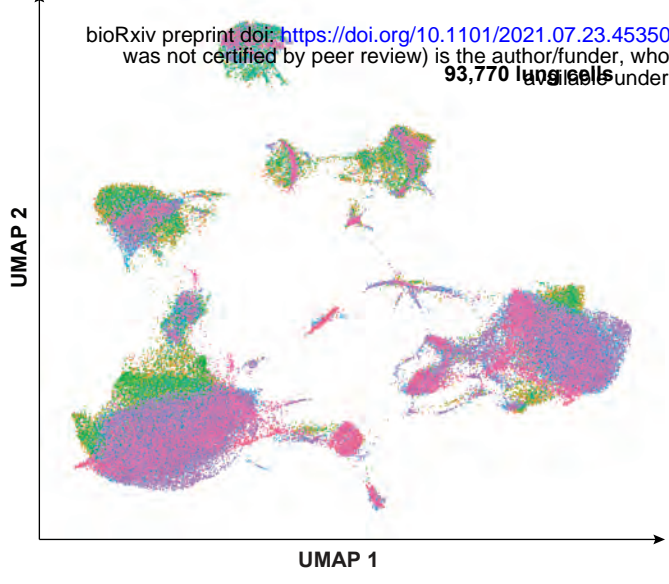**B**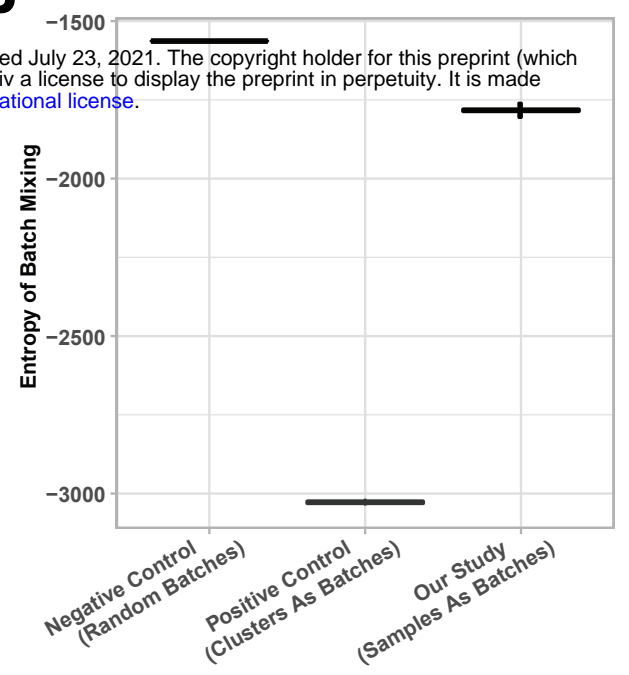**C**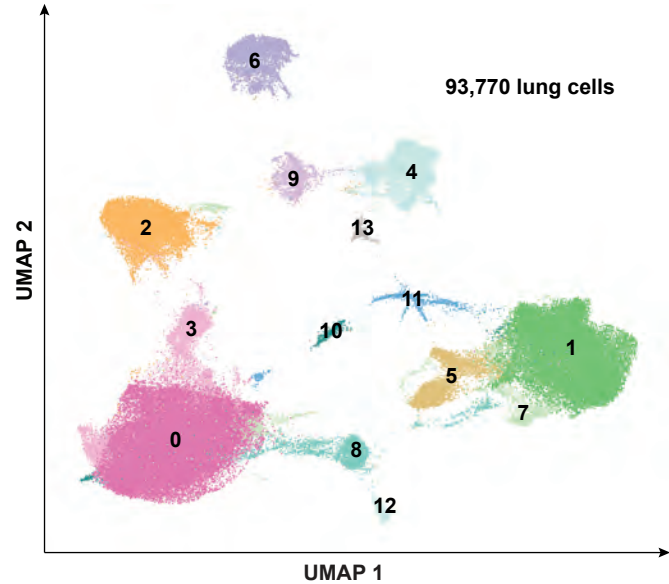**D**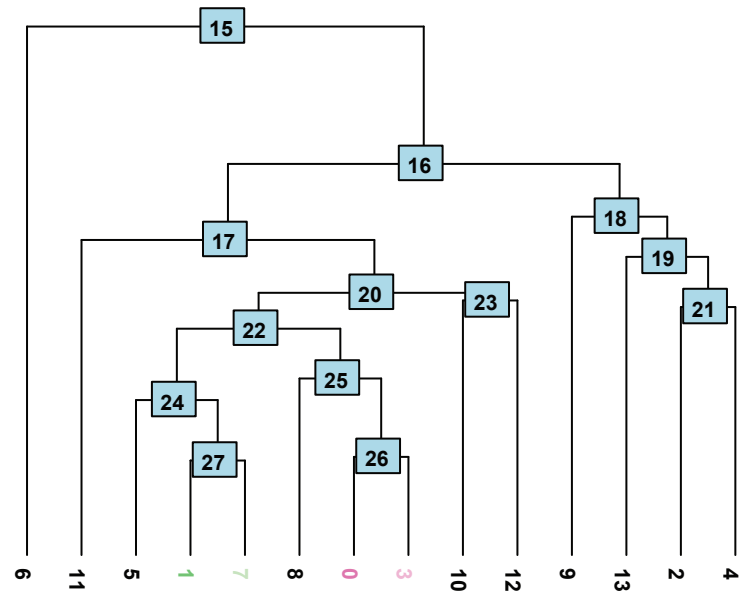**E**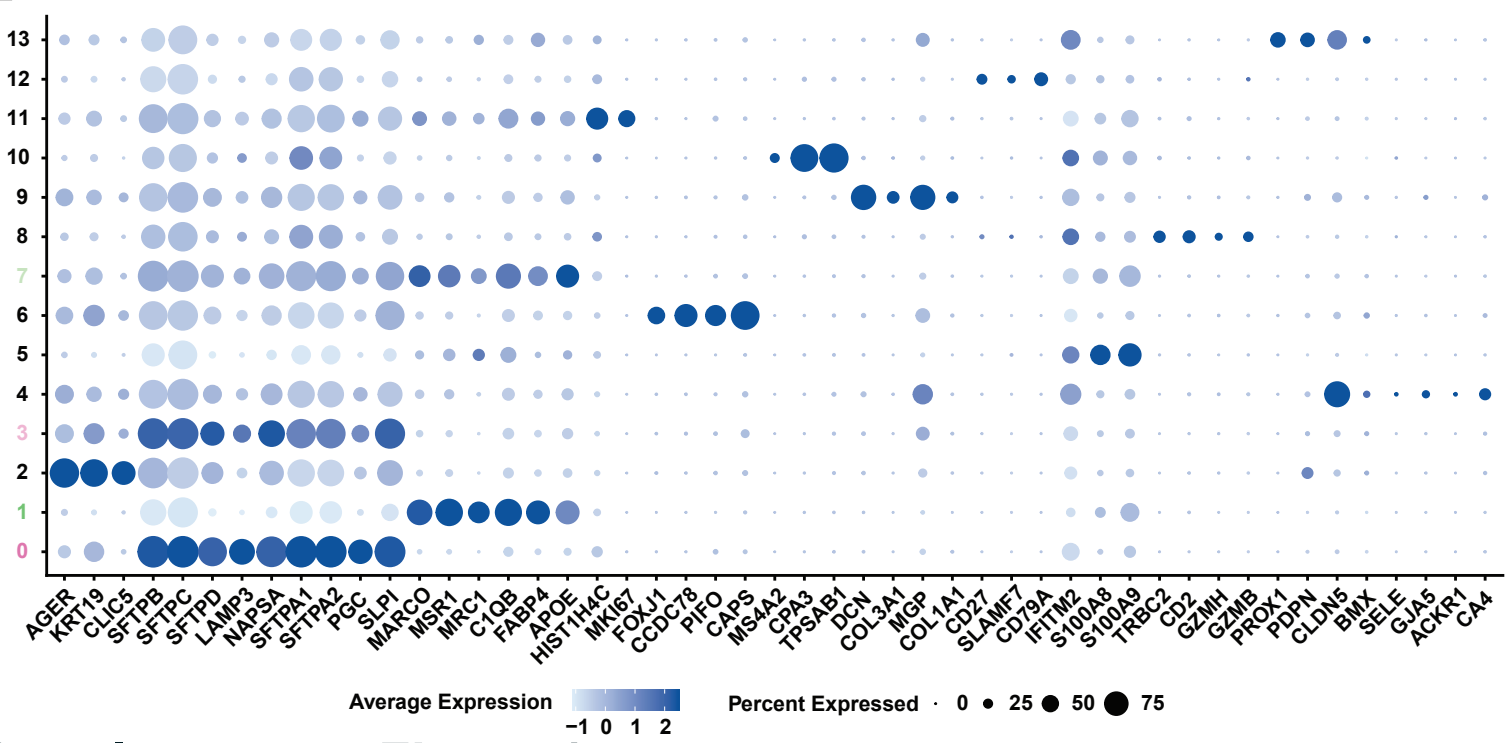**Supplementary Figure 1**

**A**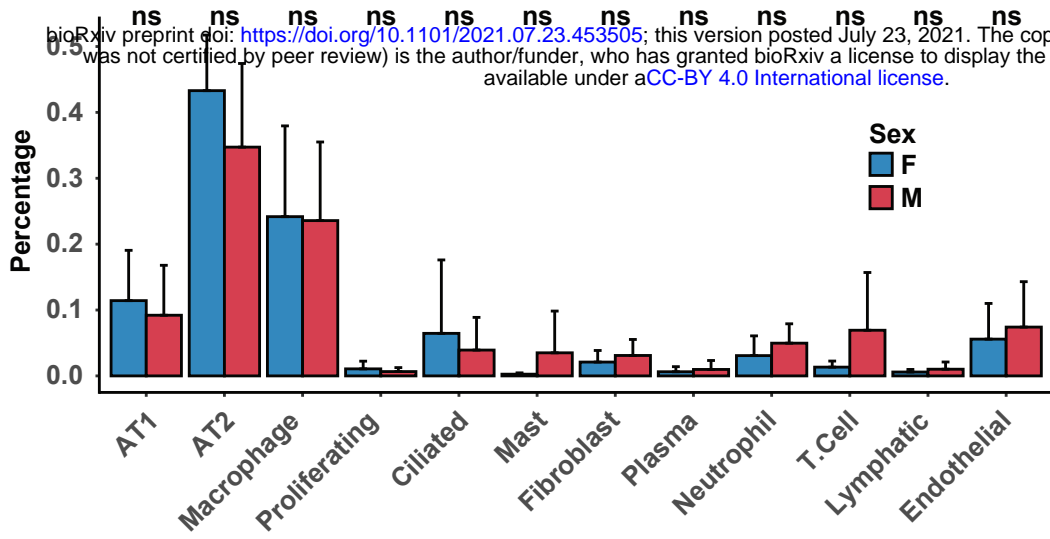**B**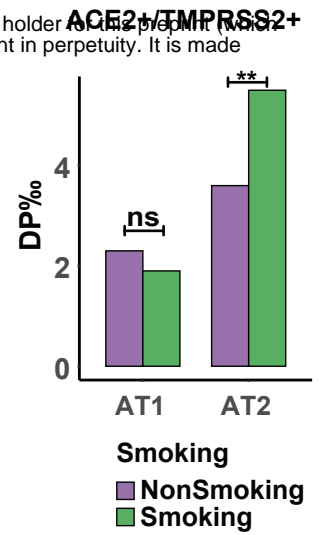**C**

Liao et al. Nat Med. 2020  
n = 13 (9 Patients/4 Controls)

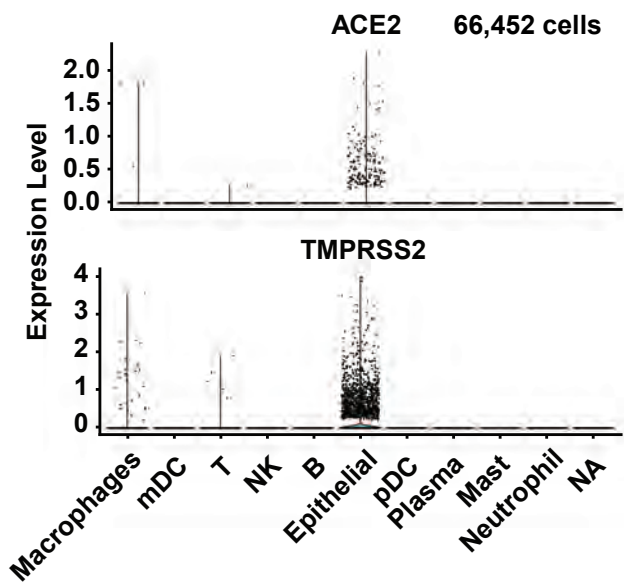**D**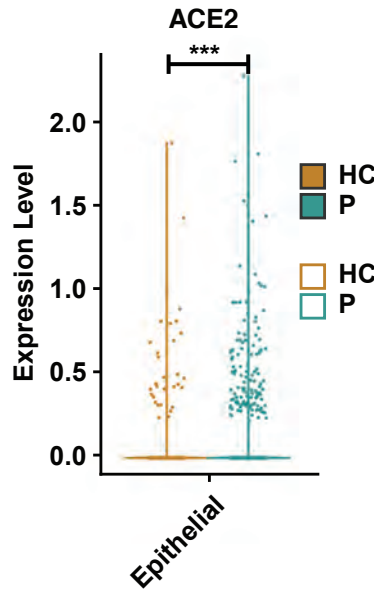**E**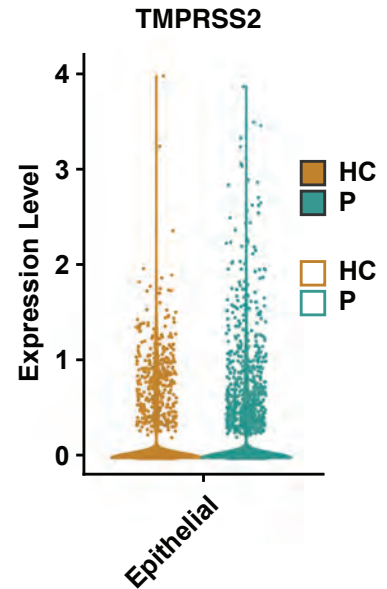**F**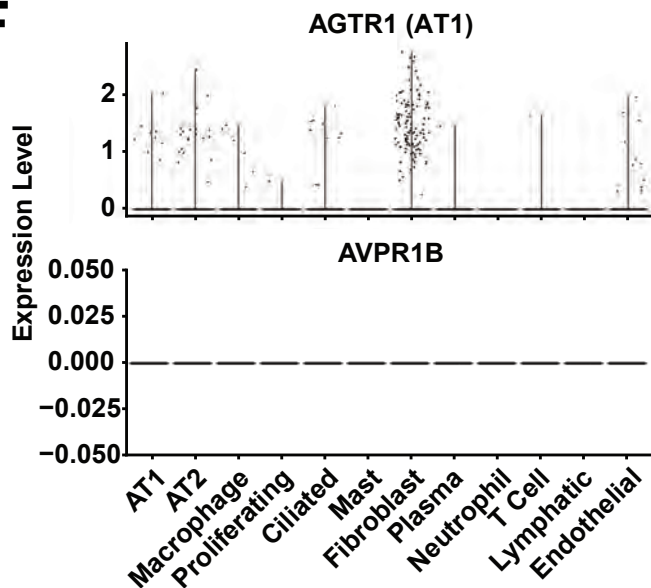**G**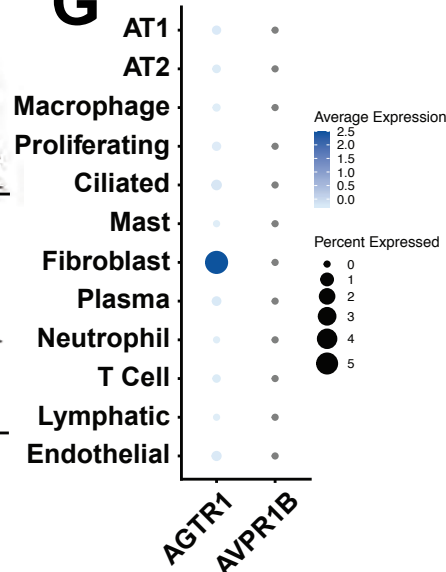**H**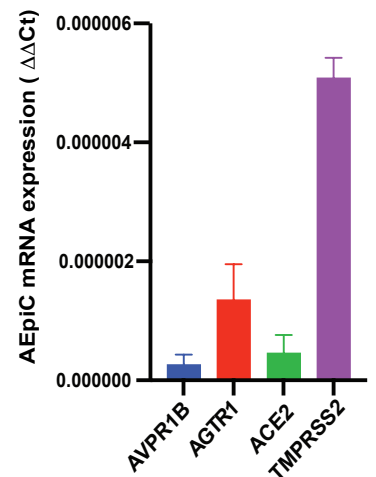

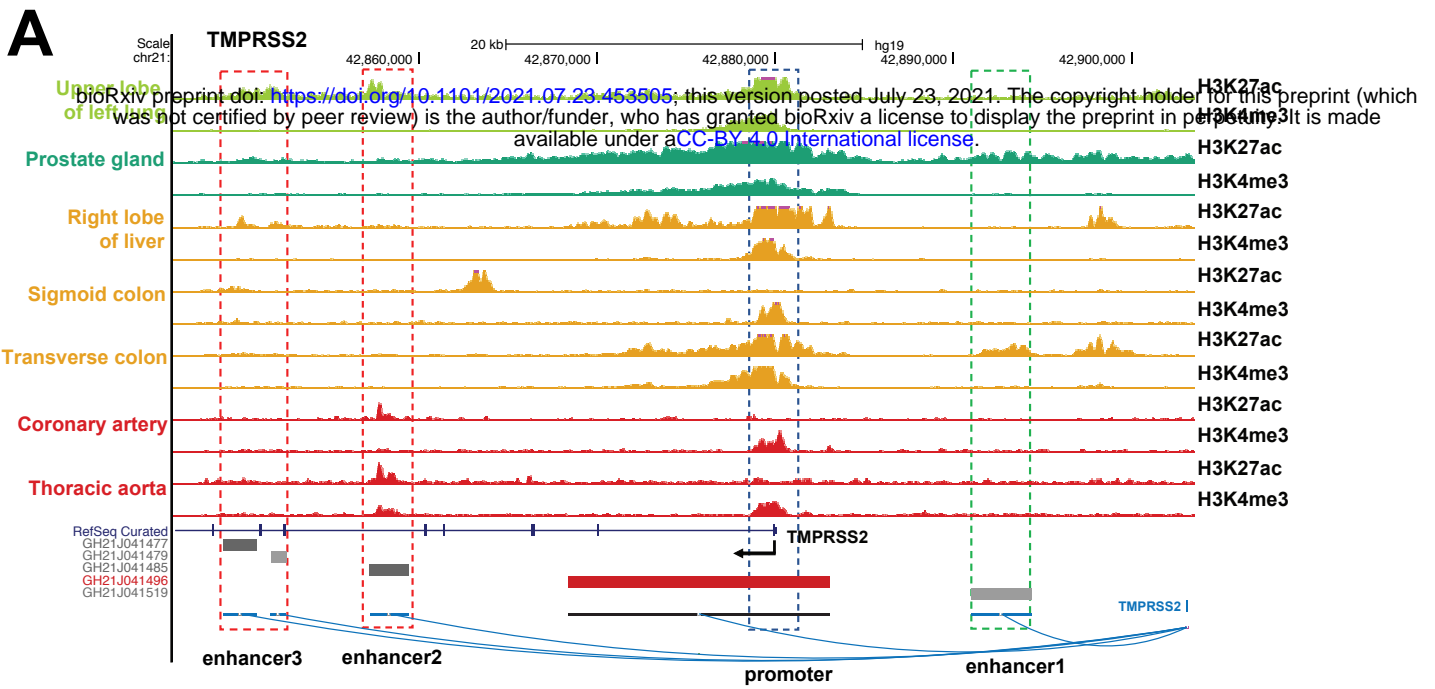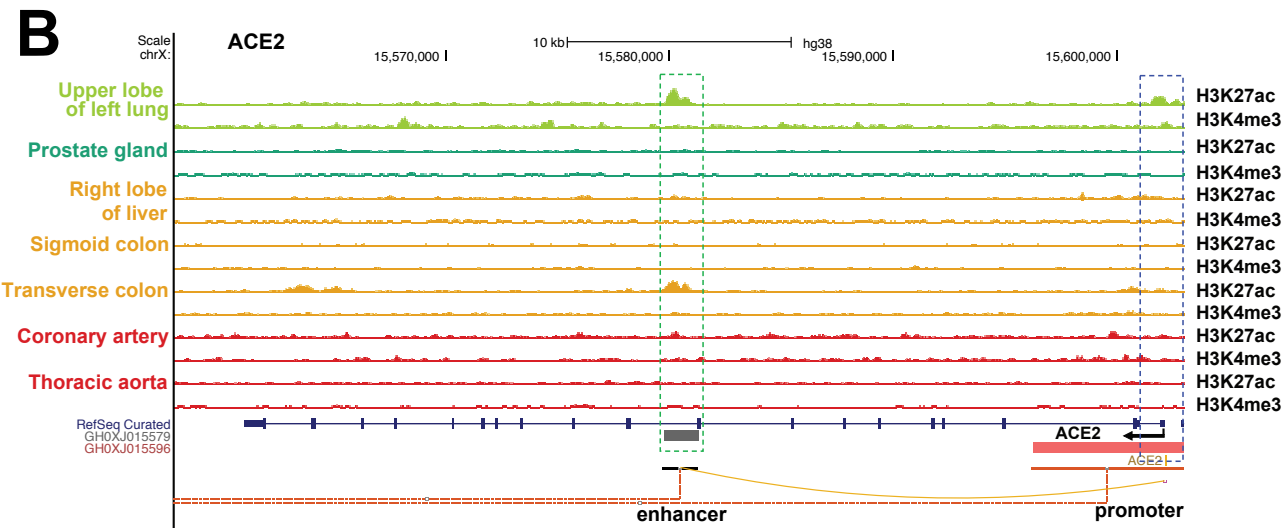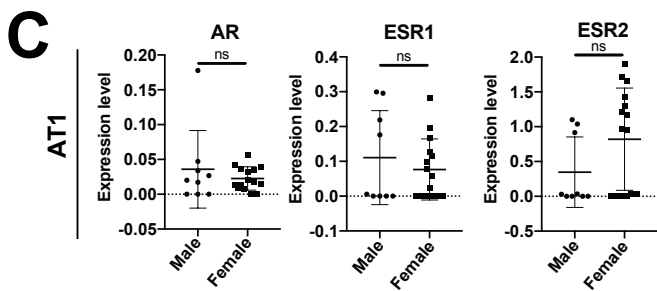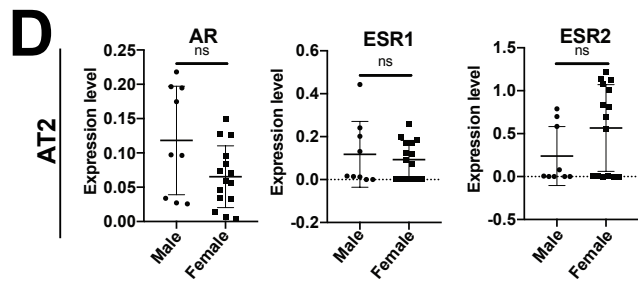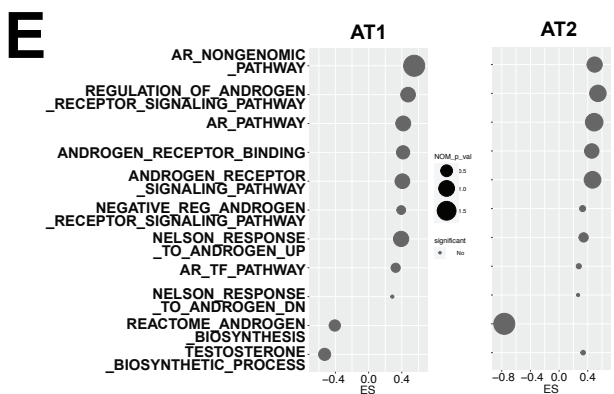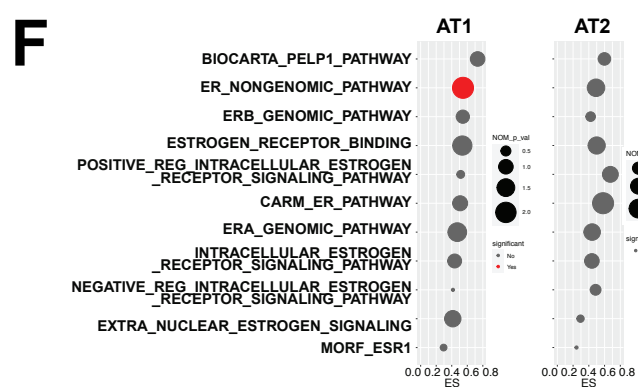

AT1

A

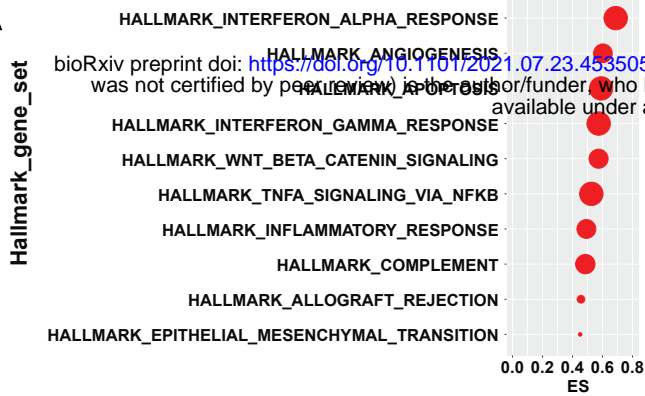

B

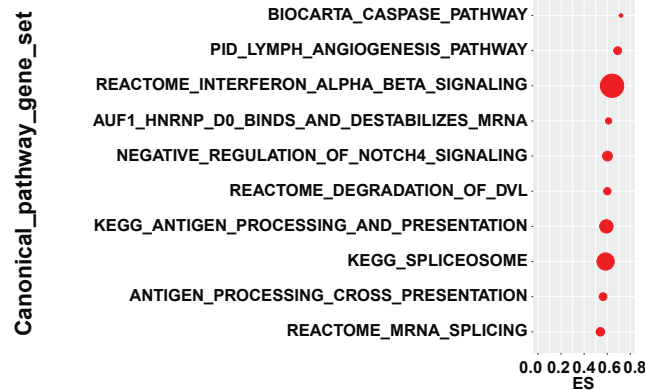

C

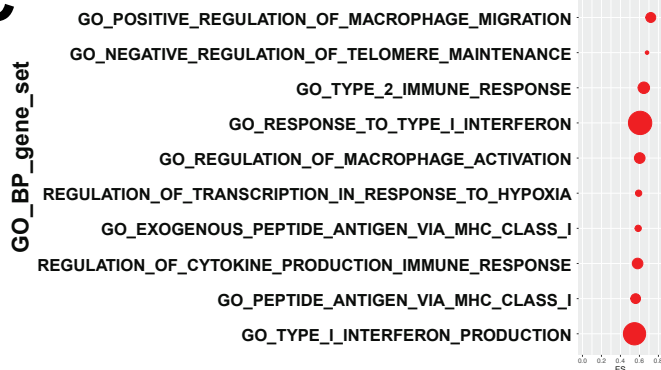

G

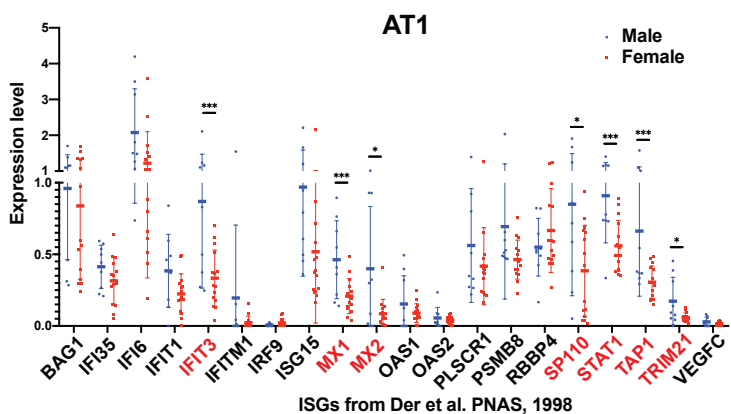

AT2

D

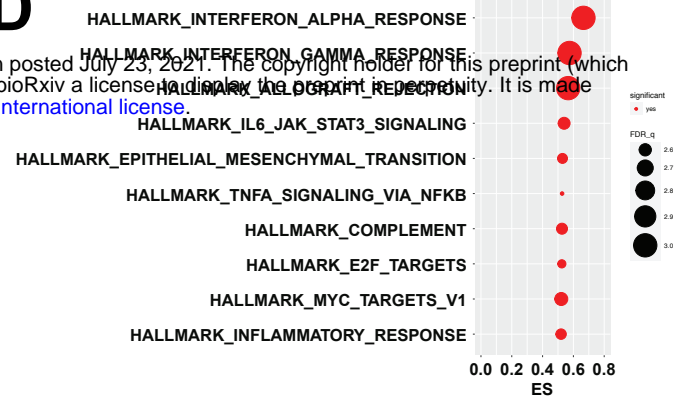

E

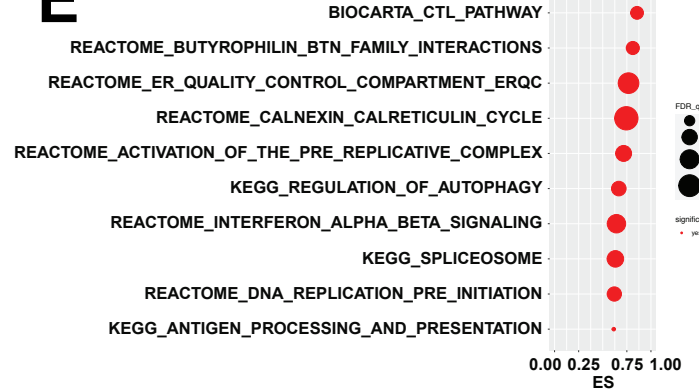

F

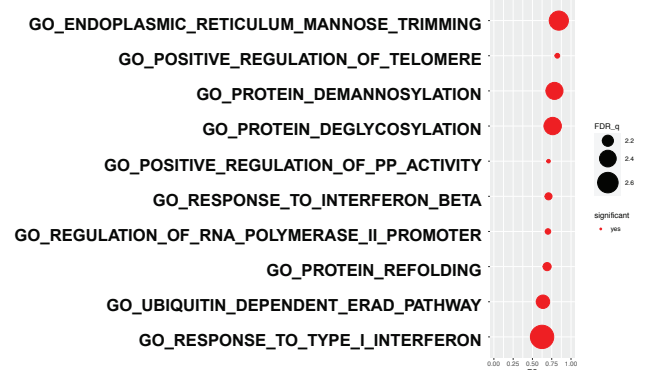

H

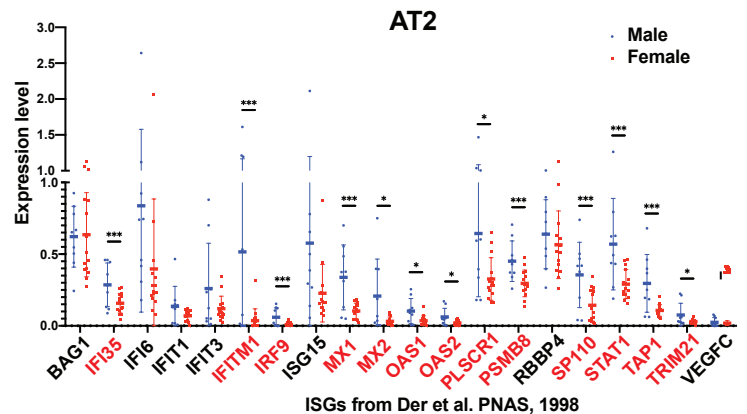

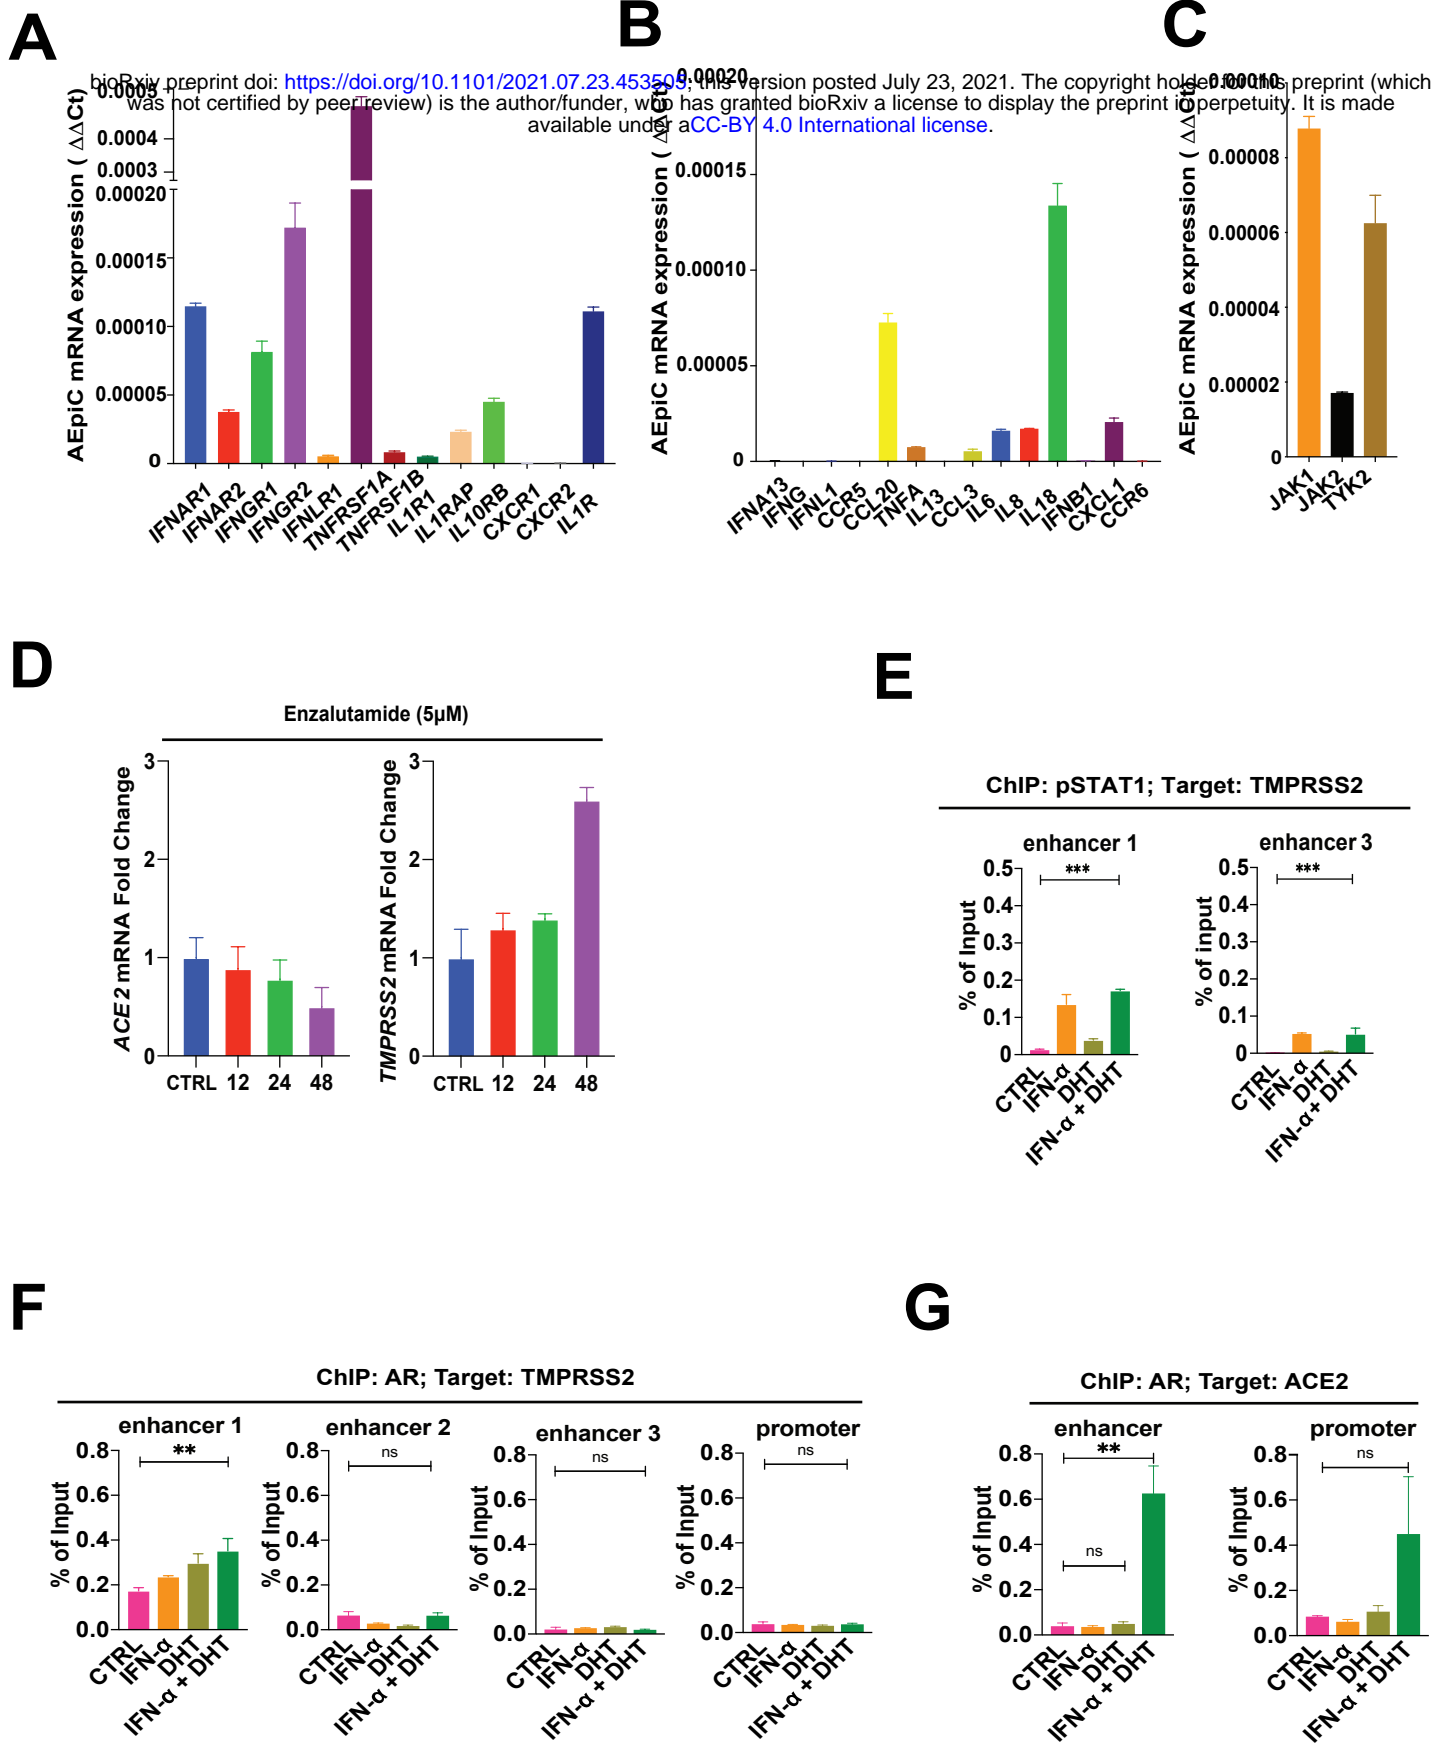

Supplementary Figure 5



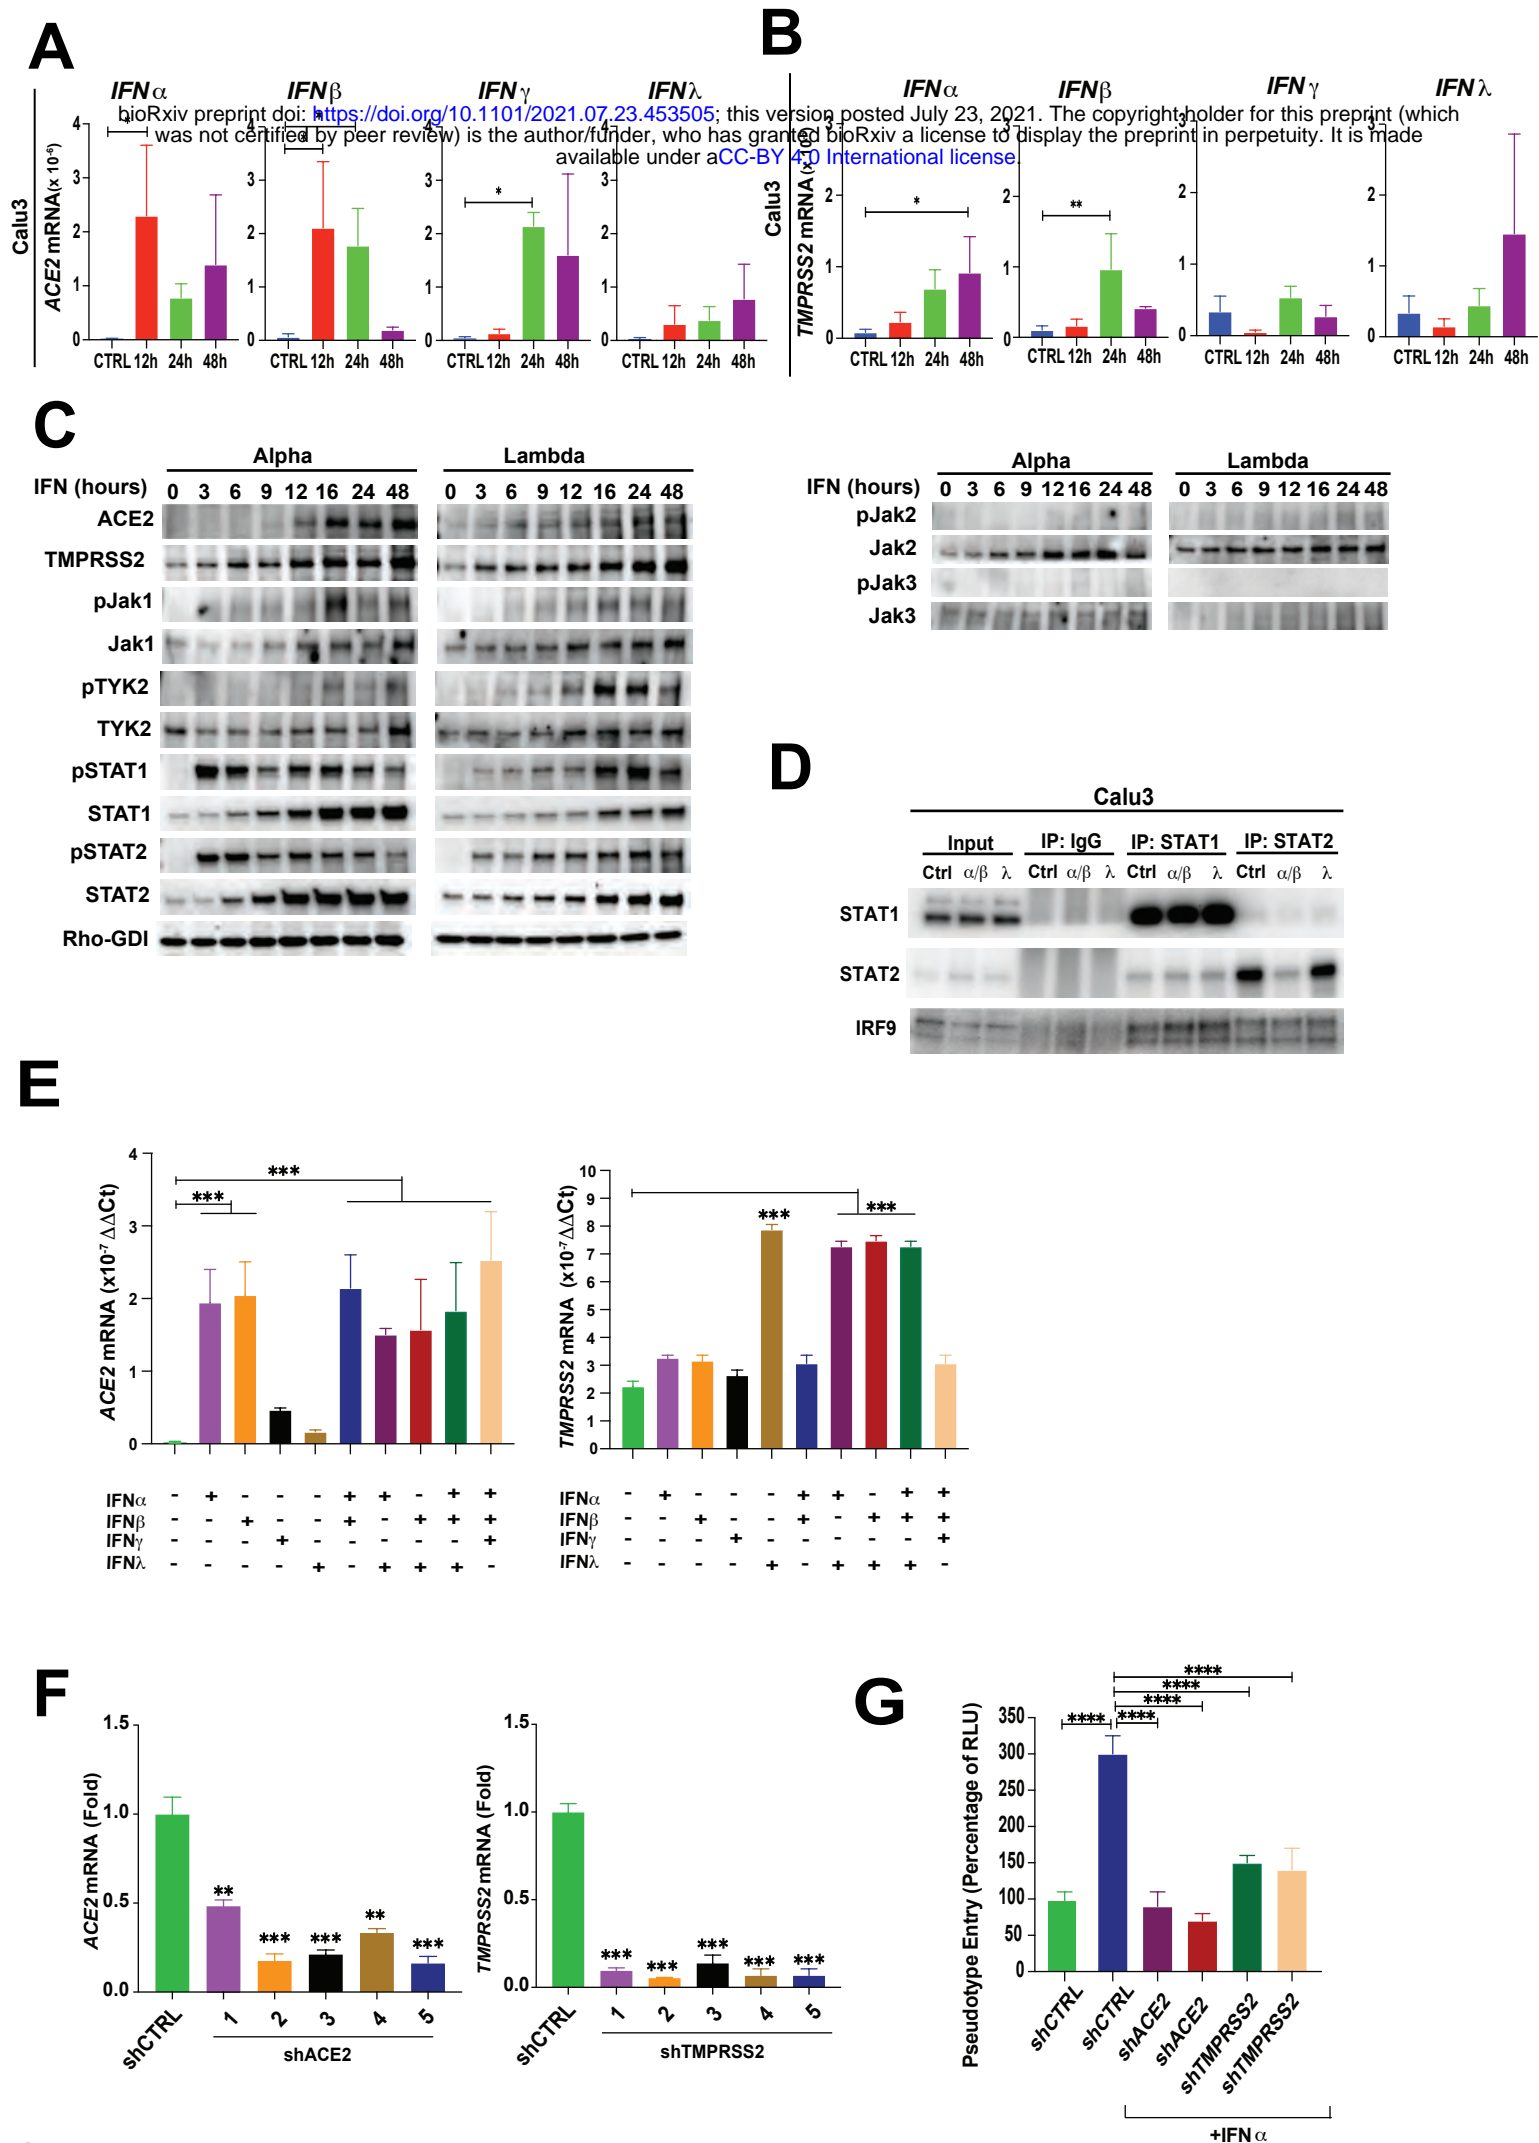

Supplementary Figure 6

**A**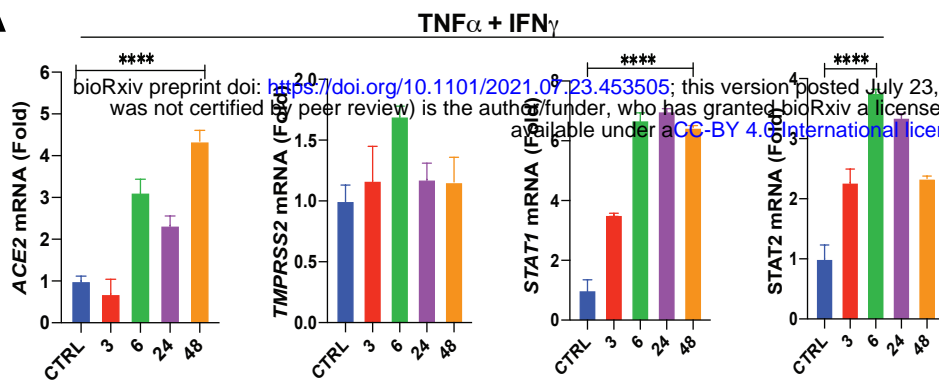**B**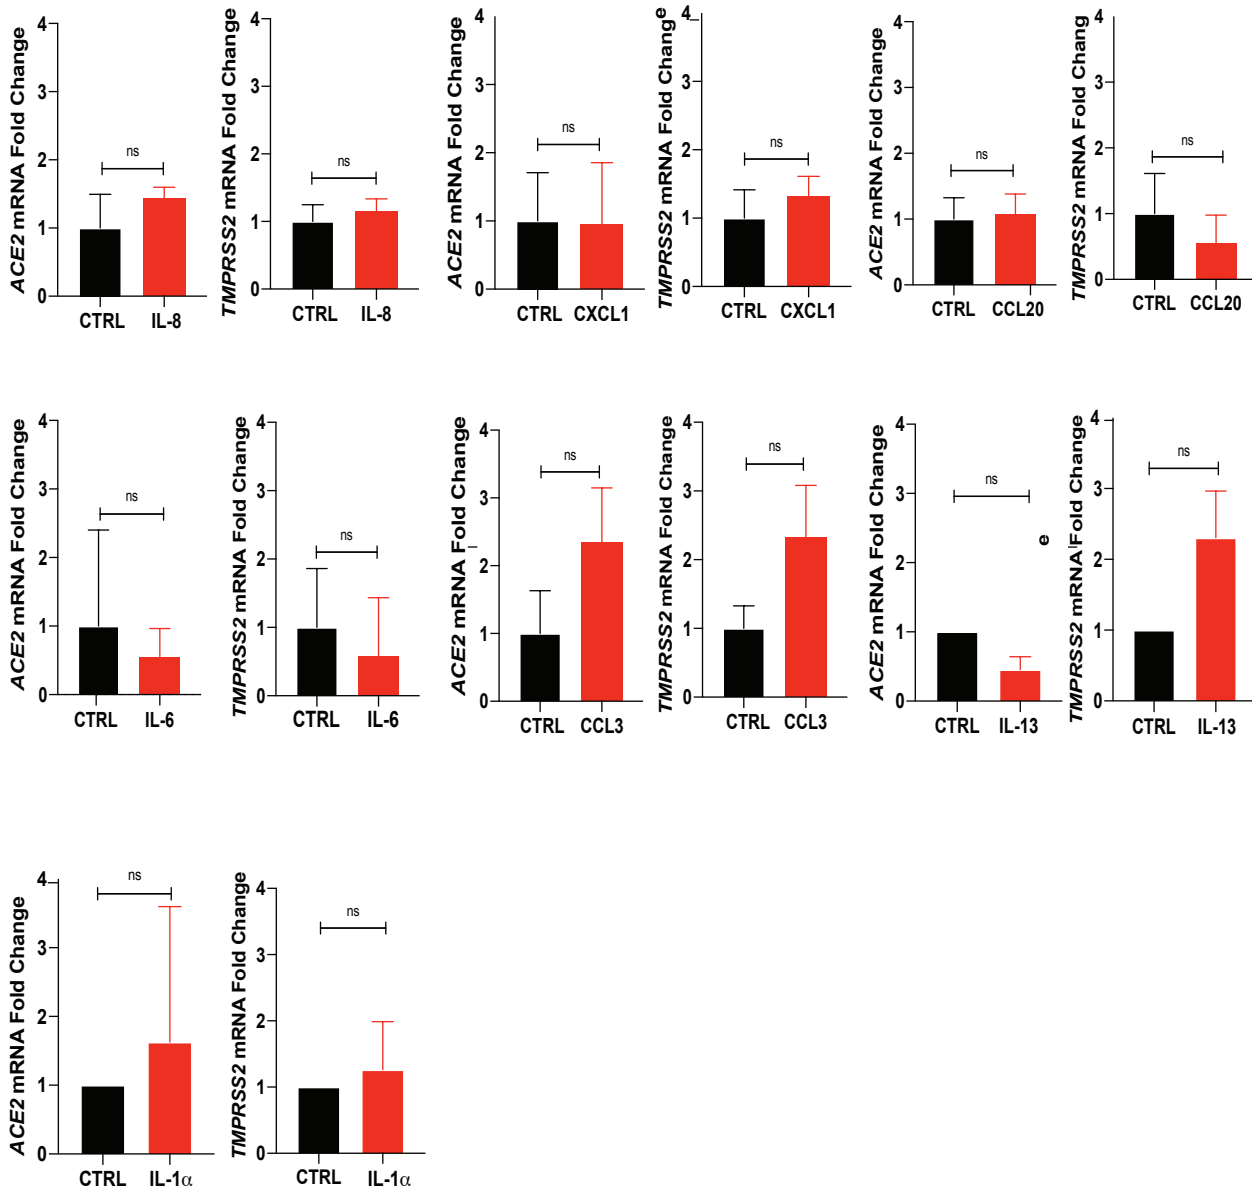**C**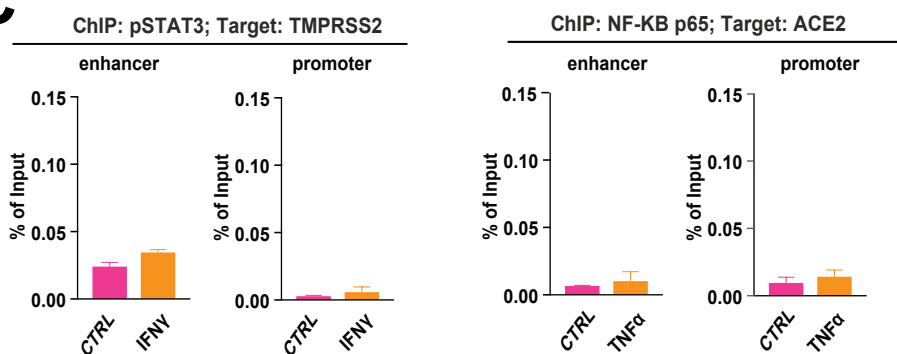**Supplementary Figure 7**
